# Supplementary material for: Plant traits and environment: floating leaf blade production and turnover of Nymphoides peltata (S.G. Gmel.) O. Kuntze (Menyanthaceae)
Source: PeerJ. 2022 Sep 1;10:e13976. doi: 10.7717/peerj.13976 (PMC9441140; doi:10.7717/peerj.13976)
Supplement: Supplemental Information 1 [file peerj-10-13976-s001.xlsx]

## Sheet: Basic data
Basic data: leaf type, date, leaf nr, leaf length, leaf width, surface, tot % damage, leaf status, leaf age, damage types of plts CB-1 1978-1979, CB-2 1978-1979, BS-1 1980, BS-2 1980
Leaf type	Date	Max temp	Min temp	Leaf #	Length	Width	Surface	Tot % dam	Status	Age	Pot Biom/m	Pot Biom/a	Abs grow	Rel grow	Crea date	Begin surf	Cataclysta %	Rem dam %	Micr dec %	Septoria %	Autolysis %
Plot 1, Nymphoides peltata, Tank 1, 1978
1	1978-05-25	140	125	1	62	55	2763.09	0	2	0	8345.53	898	0	0	1978-05-25	2763.09	0	0	0	0	0
1	1978-05-29	260	130	1	64	58	3004.3	0	2	4	9073.49	971	241.208	8.72964	1978-05-25	2763.09	0	0	0	0	0
1	1978-05-30	255	185	1	65	59	3103.61	0	2	5	9373.21		340.517	12.3238	1978-05-25	2763.09	0	0	0	0	0
1	1978-06-01	265	190	1	65	60	3153.87	0	2	7	9524.89		390.777	14.1427	1978-05-25	2763.09	0	0	0	0	0
1	1978-06-05	285	205	1	65	60	3153.87	0	2	11	9524.89		390.777	14.1427	1978-05-25	2763.09	0	0	0	0	0
1	1978-06-09	215	180	1	65	60	3153.87	0	2	15	9524.89		390.777	14.1427	1978-05-25	2763.09	0	0	0	0	0
1	1978-06-13	215	155	1	66	60	3204.54	0	2	19	9677.79		441.441	15.9763	1978-05-25	2763.09	0	0	0	0	0
1	1978-06-16	200	150	1	66	60	3204.54	0	2	22	9677.79		441.441	15.9763	1978-05-25	2763.09	0	0	0	0	0
1	1978-06-20	240	180	1	66	60	3204.54	10	2	26	9677.79		441.441	15.9763	1978-05-25	2763.09	0	0	0	0	10
1	1978-06-23	190	170	1	66	60	3204.54	55	2	29	9677.79		441.441	15.9763	1978-05-25	2763.09	0	0	5	0	50
1	1978-06-27	190	150	1	66	60	3204.54	70	2	33	9677.79		441.441	15.9763	1978-05-25	2763.09	0	0	30	0	40
1	1978-06-30	210	170	1	66	60	3204.54	70	3	36	9677.79		441.441	15.9763	1978-05-25	2763.09	0	0	30	0	40
1	1978-05-25	140	125	2	53	51	2183.19	0	2	0	6595.36	723	0	0	1978-05-25	2183.19	0	0	0	0	0
1	1978-05-29	260	130	2	54	52	2267.96	0	2	4	6851.21		84.7761	3.88314	1978-05-25	2183.19	0	0	0	0	0
1	1978-05-30	255	185	2	54	52	2267.96	10	2	5	6851.21		84.7761	3.88314	1978-05-25	2183.19	0	0	0	0	10
1	1978-06-01	265	190	2	54	52	2267.96	15	2	7	6851.21		84.7761	3.88314	1978-05-25	2183.19	0	0	0	0	15
1	1978-06-05	285	205	2	54	52	2267.96	40	2	11	6851.21		84.7761	3.88314	1978-05-25	2183.19	0	0	0	0	40
1	1978-06-09	215	180	2	54	52	2267.96	90	2	15	6851.21		84.7761	3.88314	1978-05-25	2183.19	0	0	10	0	80
1	1978-06-13	215	155	2	54	52	2267.96	90	3	19	6851.21		84.7761	3.88314	1978-05-25	2183.19	0	0	10	0	80
1	1978-05-25	140	125	3	57	52	2398.15	0	2	0	7244.13		0	0	1978-05-25	2398.15	0	0	0	0	0
1	1978-05-29	260	130	3	59	54	2577.39	0	2	4	7785.08		179.241	7.47412	1978-05-25	2398.15	0	0	0	0	0
1	1978-05-30	255	185	3	61	55	2716.06	0	2	5	8203.59		317.91	13.2565	1978-05-25	2398.15	0	0	0	0	0
1	1978-06-01	265	190	3	61	56	2763.09	0	2	7	8345.53		364.941	15.2176	1978-05-25	2398.15	0	0	0	0	0
1	1978-06-05	285	205	3	61	56	2763.09	0	2	11	8345.53		364.941	15.2176	1978-05-25	2398.15	0	0	0	0	0
1	1978-06-09	215	180	3	61	56	2763.09	0	2	15	8345.53		364.941	15.2176	1978-05-25	2398.15	0	0	0	0	0
1	1978-06-13	215	155	3	61	56	2763.09	15	2	19	8345.53		364.941	15.2176	1978-05-25	2398.15	0	0	0	0	15
1	1978-06-16	200	150	3	61	56	2763.09	60	2	22	8345.53		364.941	15.2176	1978-05-25	2398.15	0	0	0	0	60
1	1978-06-20	240	180	3	61	66	3255.6	90	2	26	9831.92		857.449	35.7546	1978-05-25	2398.15	0	0	0	0	90
1	1978-06-23	190	170	3	61	66	3255.6	90	2	29	9831.92		857.449	35.7546	1978-05-25	2398.15	0	0	10	0	80
1	1978-06-27	190	150	3	61	66	3255.6	100	2	33	9831.92		857.449	35.7546	1978-05-25	2398.15	0	0	30	0	70
1	1978-06-30	210	170	3	61	66	3255.6	100	2	36	9831.92		857.449	35.7546	1978-05-25	2398.15	0	0	40	0	60
1	1978-07-04	230	225	3	61	66	3255.6	100	3	40	9831.92		857.449	35.7546	1978-05-25	2398.15	0	0	40	0	60
1	1978-05-25	140	125	4	49	45	1783.53	0	2	0	5389.19		0	0	1978-05-25	1783.53	0	0	0	0	0
1	1978-05-29	260	130	4	50	46	1860.23	0	2	4	5620.68		76.7022	4.30059	1978-05-25	1783.53	0	0	0	0	0
1	1978-05-30	255	185	4	50	46	1860.23	0	2	5	5620.68		76.7022	4.30059	1978-05-25	1783.53	0	0	0	0	0
1	1978-06-01	265	190	4	51	46	1899.19	0	2	7	5738.25		115.659	6.48483	1978-05-25	1783.53	0	0	0	0	0
1	1978-06-05	285	205	4	52	47	1978.31	0	2	11	5977.05		194.783	10.9212	1978-05-25	1783.53	0	0	0	0	0
1	1978-06-09	215	180	4	52	47	1978.31	30	2	15	5977.05		194.783	10.9212	1978-05-25	1783.53	0	0	0	0	30
1	1978-06-13	215	155	4	52	47	1978.31	100	2	19	5977.05		194.783	10.9212	1978-05-25	1783.53	0	0	0	0	100
1	1978-06-16	200	150	4	52	47	1978.31	100	2	22	5977.05		194.783	10.9212	1978-05-25	1783.53	0	0	80	0	20
1	1978-06-20	240	180	4	52	47	1978.31	100	3	26	5977.05		194.783	10.9212	1978-05-25	1783.53	0	0	80	0	20
1	1978-05-25	140	140	5	63	63	3204.54	0	2	0	9677.79		0	0	1978-05-25	3204.54	0	0	0	0	0
1	1978-05-29	260	130	5	63	64	3255.6	0	2	4	9831.92		51.0675	1.5936	1978-05-25	3204.54	0	0	0	0	0
1	1978-05-30	255	185	5	63	64	3255.6	0	2	5	9831.92		51.0675	1.5936	1978-05-25	3204.54	0	0	0	0	0
1	1978-06-01	265	190	5	63	64	3255.6	0	2	7	9831.92		51.0675	1.5936	1978-05-25	3204.54	0	0	0	0	0
1	1978-06-05	285	205	5	63	64	3255.6	0	2	11	9831.92		51.0675	1.5936	1978-05-25	3204.54	0	0	0	0	0
1	1978-06-09	215	180	5	63	64	3255.6	0	2	15	9831.92		51.0675	1.5936	1978-05-25	3204.54	0	0	0	0	0
1	1978-06-13	215	155	5	63	64	3255.6	2	2	19	9831.92		51.0675	1.5936	1978-05-25	3204.54	2	0	0	0	0
1	1978-06-16	200	150	5	63	64	3255.6	30	2	22	9831.92		51.0675	1.5936	1978-05-25	3204.54	5	0	0	0	25
1	1978-06-20	240	180	5	63	64	3255.6	30	2	26	9831.92		51.0675	1.5936	1978-05-25	3204.54	5	0	0	0	25
1	1978-06-23	190	170	5	63	64	3255.6	40	2	29	9831.92		51.0675	1.5936	1978-05-25	3204.54	5	0	0	5	30
1	1978-06-27	190	150	5	63	64	3255.6	85	2	33	9831.92		51.0675	1.5936	1978-05-25	3204.54	5	0	5	15	60
1	1978-06-30	210	170	5	63	64	3255.6	100	2	36	9831.92		51.0675	1.5936	1978-05-25	3204.54	5	0	30	20	45
1	1978-07-04	230	225	5	63	64	3255.6	100	3	40	9831.92		51.0675	1.5936	1978-05-25	3204.54	5	0	30	20	45
1	1978-05-25	140	140	6	55	52	2310.96	0	2	0	6980.97		0	0	1978-05-25	2310.96	0	0	0	0	0
1	1978-05-29	140	125	6	55	52	2310.96	0	2	4	6980.97		0	0	1978-05-25	2310.96	0	0	0	0	0
1	1978-05-30	140	125	6	56	52	2354.35	0	2	5	7111.94		43.3973	1.87789	1978-05-25	2310.96	0	0	0	0	0
1	1978-06-01	265	190	6	56	52	2354.35	50	2	7	7111.94		43.3973	1.87789	1978-05-25	2310.96	0	0	0	0	50
1	1978-06-05	285	205	6	56	52	2354.35	100	2	11	7111.94		43.3973	1.87789	1978-05-25	2310.96	0	0	0	0	100
1	1978-06-09	215	180	6	56	52	2354.35	100	2	15	7111.94		43.3973	1.87789	1978-05-25	2310.96	0	0	0	0	100
1	1978-06-13	215	155	6	56	52	2354.35	100	2	19	7111.94		43.3973	1.87789	1978-05-25	2310.96	0	0	40	0	60
1	1978-06-16	200	150	6	56	52	2354.35	100	3	22	7111.94		43.3973	1.87789	1978-05-25	2310.96	0	0	40	0	60
1	1978-05-25	140	140	7	58	51	2398.15	0	2	0	7244.13		0	0	1978-05-25	2398.15	0	0	0	0	0
1	1978-05-29	140	125	7	60	52	2531.98	0	2	4	7648.02		133.825	5.58034	1978-05-25	2398.15	0	0	0	0	0
1	1978-05-30	140	125	7	60	52	2531.98	0	2	5	7648.02		133.825	5.58034	1978-05-25	2398.15	0	0	0	0	0
1	1978-06-01	265	190	7	61	54	2669.44	0	2	7	8062.87		271.283	11.3122	1978-05-25	2398.15	0	0	0	0	0
1	1978-06-05	285	205	7	63	54	2763.09	0	2	11	8345.53		364.941	15.2176	1978-05-25	2398.15	0	0	0	0	0
1	1978-06-09	215	180	7	63	55	2810.53	0	2	15	8488.68		412.375	17.1955	1978-05-25	2398.15	0	0	0	0	0
1	1978-06-13	215	155	7	63	55	2810.53	40	2	19	8488.68		412.375	17.1955	1978-05-25	2398.15	0	0	0	0	40
1	1978-06-16	200	150	7	63	55	2810.53	40	3	22	8488.68		412.375	17.1955	1978-05-25	2398.15	0	0	0	0	40
1	1978-05-25	140	140	8	40	42	1357.22	0	2	0	4102.61		0	0	1978-05-25	1357.22	0	0	0	0	0
1	1978-05-29	140	125	8	40	42	1357.22	0	2	4	4102.61		0	0	1978-05-25	1357.22	0	0	0	0	0
1	1978-05-30	140	125	8	41	42	1390.53	0	2	5	4203.12		33.3049	2.4539	1978-05-25	1357.22	0	0	0	0	0
1	1978-06-01	265	190	8	41	42	1390.53	0	2	7	4203.12		33.3049	2.4539	1978-05-25	1357.22	0	0	0	0	0
1	1978-06-05	285	205	8	41	43	1424.24	100	2	11	4304.86		67.0135	4.93754	1978-05-25	1357.22	0	0	0	0	100
1	1978-06-09	215	180	8	41	43	1424.24	100	2	15	4304.86		67.0135	4.93754	1978-05-25	1357.22	0	0	80	0	20
1	1978-06-13	215	155	8	41	43	1424.24	100	3	19	4304.86		67.0135	4.93754	1978-05-25	1357.22	0	0	80	0	20
1	1978-05-25	140	140	9	61	57	2810.53	0	2	0	8488.68		0	0	1978-05-25	2810.53	0	0	0	0	0
1	1978-05-29	140	125	9	62	57	2858.37	0	2	4	8633.06		47.8379	1.7021	1978-05-25	2810.53	0	0	0	0	0
1	1978-05-30	140	125	9	62	57	2858.37	0	2	5	8633.06		47.8379	1.7021	1978-05-25	2810.53	0	0	0	0	0
1	1978-06-01	265	190	9	62	58	2906.61	0	2	7	8778.65		96.0796	3.41856	1978-05-25	2810.53	0	0	0	0	0
1	1978-06-05	285	205	9	62	58	2906.61	0	2	11	8778.65		96.0796	3.41856	1978-05-25	2810.53	0	0	0	0	0
1	1978-06-09	215	180	9	62	58	2906.61	0	2	15	8778.65		96.0796	3.41856	1978-05-25	2810.53	0	0	0	0	0
1	1978-06-13	215	155	9	62	58	2906.61	2	2	19	8778.65		96.0796	3.41856	1978-05-25	2810.53	0	2	0	0	0
1	1978-06-16	200	150	9	62	58	2906.61	8	2	22	8778.65		96.0796	3.41856	1978-05-25	2810.53	0	2	5	1	0
1	1978-06-20	240	180	9	63	58	2955.25	22	2	26	8925.46		144.725	5.14938	1978-05-25	2810.53	0	2	5	5	10
1	1978-06-23	190	170	9	63	58	2955.25	62	2	29	8925.46		144.725	5.14938	1978-05-25	2810.53	0	2	10	20	30
1	1978-06-27	190	150	9	63	58	2955.25	62	3	33	8925.46		144.725	5.14938	1978-05-25	2810.53	0	2	10	20	30
1	1978-05-25	140	140	10	76	65	4012.94	0	2	0	12117.5		0	0	1978-05-25	4012.94	0	0	0	0	0
1	1978-05-29	140	125	10	80	59	3899.9	0	2	4	11776.4		-113.035	-2.81676	1978-05-25	4012.94	0	0	0	0	0
1	1978-05-30	140	125	10	81	70	4602.33	0	2	5	13896.3		589.396	14.6874	1978-05-25	4012.94	0	0	0	0	0
1	1978-06-01	265	190	10	83	71	4787.02	0	2	7	14453.7		774.086	19.2898	1978-05-25	4012.94	0	0	0	0	0
1	1978-06-05	285	205	10	83	72	4849.39	0	2	11	14642		836.457	20.844	1978-05-25	4012.94	0	0	0	0	0
1	1978-06-09	215	180	10	84	73	4975.35	0	2	15	15022.1		962.41	23.9827	1978-05-25	4012.94	0	0	0	0	0
1	1978-06-13	215	155	10	84	73	4975.35	0	2	19	15022.1		962.41	23.9827	1978-05-25	4012.94	0	0	0	0	0
1	1978-06-16	200	150	10	84	73	4975.35	0	2	22	15022.1		962.41	23.9827	1978-05-25	4012.94	0	0	0	0	0
1	1978-06-20	240	180	10	84	73	4975.35	20	2	26	15022.1		962.41	23.9827	1978-05-25	4012.94	0	0	0	0	20
1	1978-06-23	190	170	10	84	73	4975.35	100	2	29	15022.1		962.41	23.9827	1978-05-25	4012.94	0	0	0	0	100
1	1978-06-27	190	150	10	84	73	4975.35	100	2	33	15022.1		962.41	23.9827	1978-05-25	4012.94	0	0	10	0	90
1	1978-06-30	210	170	10	84	73	4975.35	100	2	36	15022.1		962.41	23.9827	1978-05-25	4012.94	0	0	25	0	75
1	1978-07-04	230	225	10	84	73	4975.35	100	3	40	15022.1		962.41	23.9827	1978-05-25	4012.94	0	0	25	0	75
1	1978-05-25	140	140	11	67	50	2763.09	0	2	0	8345.53		0	0	1978-05-25	2763.09	0	0	0	0	0
1	1978-05-29	140	125	11	67	51	2810.53	0	2	4	8488.68		47.4342	1.71671	1978-05-25	2763.09	0	0	0	0	0
1	1978-05-30	140	125	11	67	51	2810.53	0	2	5	8488.68		47.4342	1.71671	1978-05-25	2763.09	0	0	0	0	0
1	1978-06-01	265	190	11	67	51	2810.53	0	2	7	8488.68		47.4342	1.71671	1978-05-25	2763.09	0	0	0	0	0
1	1978-06-05	285	205	11	67	51	2810.53	0	2	11	8488.68		47.4342	1.71671	1978-05-25	2763.09	0	0	0	0	0
1	1978-06-09	215	180	11	67	51	2810.53	100	2	15	8488.68		47.4342	1.71671	1978-05-25	2763.09	0	0	0	0	100
1	1978-06-13	215	155	11	67	51	2810.53	100	2	19	8488.68		47.4342	1.71671	1978-05-25	2763.09	0	0	0	0	100
1	1978-06-16	200	150	11	67	51	2810.53	100	2	22	8488.68		47.4342	1.71671	1978-05-25	2763.09	0	0	0	0	100
1	1978-06-20	240	180	11	67	52	2858.37	100	2	26	8633.06		95.2722	3.44802	1978-05-25	2763.09	0	0	0	0	100
1	1978-06-23	190	170	11	67	52	2858.37	100	2	29	8633.06		95.2722	3.44802	1978-05-25	2763.09	0	0	5	0	95
1	1978-06-27	190	150	11	67	52	2858.37	100	2	33	8633.06		95.2722	3.44802	1978-05-25	2763.09	0	0	25	0	75
1	1978-06-30	210	170	11	67	52	2858.37	100	3	36	8633.06		95.2722	3.44802	1978-05-25	2763.09	0	0	25	0	75
1	1978-05-25	140	140	12	33	34	906.095	0	2	0	2741.1		0	0	1978-05-25	906.095	0	0	0	0	0
1	1978-05-29	140	125	12	33	34	906.095	0	2	4	2741.1		0	0	1978-05-25	906.095	0	0	0	0	0
1	1978-05-30	140	125	12	33	34	906.095	100	2	5	2741.1		0	0	1978-05-25	906.095	0	0	0	0	100
1	1978-06-01	265	190	12	33	34	906.095	100	2	7	2741.1		0	0	1978-05-25	906.095	0	0	40	0	60
1	1978-06-05	285	205	12	33	34	906.095	100	3	11	2741.1		0	0	1978-05-25	906.095	0	0	40	0	60
1	1978-05-25	140	140	13	28	28	632.995	0	2	0	1916.88		0	0	1978-05-25	632.995	0	0	0	0	0
1	1978-05-29	140	125	13	28	28	632.995	100	2	4	1916.88		0	0	1978-05-25	632.995	0	0	15	0	85
1	1978-05-30	140	125	13	28	28	632.995	100	2	5	1916.88		0	0	1978-05-25	632.995	0	0	20	0	80
1	1978-06-01	265	190	13	28	28	632.995	100	2	7	1916.88		0	0	1978-05-25	632.995	0	0	80	0	20
1	1978-06-05	285	205	13	28	28	632.995	100	3	11	1916.88		0	0	1978-05-25	632.995	0	0	80	0	20
1	1978-05-25	140	140	14	35	35	989.054	0	2	0	2991.47		0	0	1978-05-25	989.054	0	0	0	0	0
1	1978-05-29	140	125	14	35	35	989.054	0	2	4	2991.47		0	0	1978-05-25	989.054	0	0	0	0	0
1	1978-05-30	140	125	14	35	35	989.054	100	2	5	2991.47		0	0	1978-05-25	989.054	0	0	0	0	100
1	1978-06-01	265	190	14	35	35	989.054	100	2	7	2991.47		0	0	1978-05-25	989.054	0	0	0	0	100
1	1978-06-05	285	205	14	35	35	989.054	100	3	11	2991.47		0	0	1978-05-25	989.054	0	0	0	0	100
1	1978-05-25	140	140	15	23	23	427.11	100	2	0	1295.52		0	0	1978-05-25	427.11	0	0	0	0	100
1	1978-05-29	140	125	15	23	23	427.11	100	2	4	1295.52		0	0	1978-05-25	427.11	0	0	0	0	100
1	1978-05-30	140	125	15	23	23	427.11	100	2	5	1295.52		0	0	1978-05-25	427.11	0	0	0	0	100
1	1978-06-01	265	190	15	23	23	427.11	100	2	7	1295.52		0	0	1978-05-25	427.11	0	0	80	0	20
1	1978-06-05	285	205	15	23	23	427.11	100	3	11	1295.52		0	0	1978-05-25	427.11	0	0	80	0	20
1	1978-05-25	140	140	16	23	21	390.777	100	2	0	1185.87		0	0	1978-05-25	390.777	0	0	0	0	100
1	1978-05-29	140	125	16	23	21	390.777	100	2	4	1185.87		0	0	1978-05-25	390.777	0	0	0	0	100
1	1978-05-30	140	125	16	23	21	390.777	100	2	5	1185.87		0	0	1978-05-25	390.777	0	0	0	0	100
1	1978-06-01	265	190	16	23	21	390.777	100	2	7	1185.87		0	0	1978-05-25	390.777	0	0	0	0	100
1	1978-06-05	285	205	16	23	21	390.777	100	3	11	1185.87		0	0	1978-05-25	390.777	0	0	0	0	100
1	1978-05-25	140	140	17	22	23	408.742	100	2	0	1240.09		0	0	1978-05-25	408.742	0	0	0	0	100
1	1978-05-29	140	125	17	22	24	427.11	100	2	4	1295.52		18.3681	4.49383	1978-05-25	408.742	0	0	0	0	100
1	1978-05-30	140	125	17	22	24	427.11	100	2	5	1295.52		18.3681	4.49383	1978-05-25	408.742	0	0	0	0	100
1	1978-06-01	265	190	17	22	24	427.11	100	3	7	1295.52		18.3681	4.49383	1978-05-25	408.742	0	0	0	0	100
1	1978-05-25	140	140	18	44	38	1357.22	0	2	0	4102.61		0	0	1978-05-25	1357.22	0	0	0	0	0
1	1978-05-29	140	125	18	44	39	1390.53	0	2	4	4203.12		33.3049	2.4539	1978-05-25	1357.22	0	0	0	0	0
1	1978-05-30	140	125	18	44	39	1390.53	0	3	5	4203.12		33.3049	2.4539	1978-05-25	1357.22	0	0	0	0	0
1	1978-05-25	140	140	19	52	49	2059.05	0	2	0	6220.72		0	0	1978-05-25	2059.05	0	0	0	0	0
1	1978-05-29	140	125	19	53	50	2141.4	0	2	4	6469.26		82.3539	3.99961	1978-05-25	2059.05	0	0	0	0	0
1	1978-05-30	140	125	19	53	51	2183.19	0	2	5	6595.36		124.136	6.02882	1978-05-25	2059.05	0	0	0	0	0
1	1978-06-01	265	190	19	55	51	2267.96	0	2	7	6851.21		208.912	10.1461	1978-05-25	2059.05	0	0	0	0	0
1	1978-06-05	285	205	19	58	52	2442.36	0	2	11	7377.54		383.309	18.6158	1978-05-25	2059.05	0	0	0	0	0
1	1978-06-09	215	180	19	59	53	2531.98	0	2	15	7648.02		472.929	22.9683	1978-05-25	2059.05	0	0	0	0	0
1	1978-06-13	215	155	19	59	53	2531.98	50	2	19	7648.02		472.929	22.9683	1978-05-25	2059.05	0	0	0	0	50
1	1978-06-16	200	150	19	59	53	2531.98	100	2	22	7648.02		472.929	22.9683	1978-05-25	2059.05	0	0	0	0	100
1	1978-06-20	240	180	19	59	53	2531.98	100	2	26	7648.02		472.929	22.9683	1978-05-25	2059.05	0	0	20	0	80
1	1978-06-23	190	170	19	59	53	2531.98	100	2	29	7648.02		472.929	22.9683	1978-05-25	2059.05	0	0	30	0	70
1	1978-06-27	190	150	19	59	53	2531.98	100	3	33	7648.02		472.929	22.9683	1978-05-25	2059.05	0	0	30	0	70
1	1978-05-25	140	140	20	19	19	291.468	100	2	0	886.157		0	0	1978-05-25	291.468	0	0	0	0	100
1	1978-05-29	140	125	20	19	20	307.011	100	2	4	933.064		15.5423	5.33241	1978-05-25	291.468	0	0	0	0	100
1	1978-05-30	140	125	20	19	20	307.011	100	2	5	933.064		15.5423	5.33241	1978-05-25	291.468	0	0	0	0	100
1	1978-06-01	265	190	20	19	20	307.011	100	3	7	933.064		15.5423	5.33241	1978-05-25	291.468	0	0	0	0	100
1	1978-05-25	140	140	21	54	48	2100.02	0	2	0	6344.38		0	0	1978-05-25	2100.02	0	0	0	0	0
1	1978-05-29	140	125	21	55	49	2183.19	0	2	4	6595.36		83.1613	3.96002	1978-05-25	2100.02	0	0	0	0	0
1	1978-05-30	140	125	21	55	49	2183.19	0	2	5	6595.36		83.1613	3.96002	1978-05-25	2100.02	0	0	0	0	0
1	1978-06-01	265	190	21	56	49	2225.37	0	2	7	6722.68		125.347	5.96886	1978-05-25	2100.02	0	0	0	0	0
1	1978-06-05	285	205	21	56	50	2267.96	10	2	11	6851.21		167.937	7.99692	1978-05-25	2100.02	0	0	0	0	10
1	1978-06-09	215	180	21	56	50	2267.96	100	2	15	6851.21		167.937	7.99692	1978-05-25	2100.02	0	0	0	0	100
1	1978-06-13	215	155	21	56	50	2267.96	100	2	19	6851.21		167.937	7.99692	1978-05-25	2100.02	0	0	20	0	80
1	1978-06-16	200	150	21	56	50	2267.96	100	3	22	6851.21		167.937	7.99692	1978-05-25	2100.02	0	0	20	0	80
1	1978-05-25	140	140	22	46	39	1458.35	0	2	0	4407.81		0	0	1978-05-25	1458.35	0	0	0	0	0
1	1978-05-29	140	125	22	47	40	1527.79	0	2	4	4617.36		69.4356	4.76125	1978-05-25	1458.35	0	0	0	0	0
1	1978-05-30	140	125	22	47	41	1563.11	0	2	5	4723.97		104.759	7.18339	1978-05-25	1458.35	0	0	0	0	0
1	1978-06-01	265	190	22	48	43	1671.5	0	2	7	5051.1		213.151	14.6159	1978-05-25	1458.35	0	0	0	0	0
1	1978-06-05	285	205	22	49	43	1708.44	0	2	11	5162.58		250.089	17.1488	1978-05-25	1458.35	0	0	0	0	0
1	1978-06-09	215	180	22	49	43	1708.44	100	2	15	5162.58		250.089	17.1488	1978-05-25	1458.35	0	0	0	0	100
1	1978-06-13	215	155	22	49	43	1708.44	100	2	19	5162.58		250.089	17.1488	1978-05-25	1458.35	0	0	0	0	100
1	1978-06-16	200	150	22	49	43	1708.44	100	3	22	5162.58		250.089	17.1488	1978-05-25	1458.35	0	0	0	0	100
1	1978-05-25	140	140	23	28	31	702.632	0	2	0	2127.05		0	0	1978-05-25	702.632	0	0	0	0	0
1	1978-05-29	140	125	23	28	32	726.652	0	2	4	2199.54		24.0199	3.41856	1978-05-25	702.632	0	0	0	0	0
1	1978-05-30	140	125	23	28	32	726.652	100	2	5	2199.54		24.0199	3.41856	1978-05-25	702.632	0	0	0	0	100
1	1978-06-01	265	190	23	28	32	726.652	100	3	7	2199.54		24.0199	3.41856	1978-05-25	702.632	0	0	0	0	100
1	1978-05-25	140	140	24	39	38	1196.76	0	2	0	3618.31		0	0	1978-05-25	1196.76	0	0	0	0	0
1	1978-05-29	140	125	24	39	39	1228.04	0	2	4	3712.74		31.2864	2.61427	1978-05-25	1196.76	0	0	0	0	0
1	1978-05-30	140	125	24	39	39	1228.04	100	2	5	3712.74		31.2864	2.61427	1978-05-25	1196.76	0	0	0	0	100
1	1978-06-01	265	190	24	40	39	1259.73	100	2	7	3808.38		62.9765	5.26227	1978-05-25	1196.76	0	0	0	0	100
1	1978-06-05	285	205	24	40	39	1259.73	100	3	11	3808.38		62.9765	5.26227	1978-05-25	1196.76	0	0	0	0	100
1	1978-05-25	140	140	25	18	19	276.33	100	2	0	840.469		0	0	1978-05-25	276.33	0	0	0	0	100
1	1978-05-29	140	125	25	20	20	322.956	100	2	4	981.189		46.6268	16.8736	1978-05-25	276.33	0	0	0	0	100
1	1978-05-30	140	125	25	20	20	322.956	100	2	5	981.189		46.6268	16.8736	1978-05-25	276.33	0	0	0	0	100
1	1978-06-01	265	190	25	20	20	322.956	100	3	7	981.189		46.6268	16.8736	1978-05-25	276.33	0	0	0	0	100
1	1978-05-25	140	140	26	46	41	1527.79	0	2	0	4617.36		0	0	1978-05-25	1527.79	0	0	0	0	0
1	1978-05-29	140	125	26	46	41	1527.79	0	2	4	4617.36		0	0	1978-05-25	1527.79	0	0	0	0	0
1	1978-05-30	140	125	26	46	41	1527.79	0	2	5	4617.36		0	0	1978-05-25	1527.79	0	0	0	0	0
1	1978-06-01	265	190	26	47	41	1563.11	0	2	7	4723.97		35.3234	2.31206	1978-05-25	1527.79	0	0	0	0	0
1	1978-06-05	285	205	26	47	41	1563.11	0	2	11	4723.97		35.3234	2.31206	1978-05-25	1527.79	0	0	0	0	0
1	1978-06-09	215	180	26	47	43	1634.97	100	2	15	4940.84		107.181	7.01546	1978-05-25	1527.79	0	0	0	0	100
1	1978-06-13	215	155	26	47	43	1634.97	100	2	19	4940.84		107.181	7.01546	1978-05-25	1527.79	0	0	0	0	100
1	1978-06-16	200	150	26	47	43	1634.97	100	2	22	4940.84		107.181	7.01546	1978-05-25	1527.79	0	0	0	0	100
1	1978-06-20	240	180	26	47	43	1634.97	100	2	26	4940.84		107.181	7.01546	1978-05-25	1527.79	0	0	20	0	80
1	1978-06-23	190	170	26	47	43	1634.97	100	3	29	4940.84		107.181	7.01546	1978-05-25	1527.79	0	0	20	0	80
1	1978-05-25	140	140	27	44	44	1563.11	0	2	0	4723.97		0	0	1978-05-25	1563.11	0	0	0	0	0
1	1978-05-29	140	125	27	44	44	1563.11	0	2	4	4723.97		0	0	1978-05-25	1563.11	0	0	0	0	0
1	1978-05-30	140	125	27	44	44	1563.11	100	2	5	4723.97		0	0	1978-05-25	1563.11	0	0	0	0	100
1	1978-06-01	265	190	27	44	44	1563.11	100	2	7	4723.97		0	0	1978-05-25	1563.11	0	0	0	0	100
1	1978-06-05	285	205	27	44	44	1563.11	100	2	11	4723.97		0	0	1978-05-25	1563.11	0	0	20	0	80
1	1978-06-09	215	180	27	44	44	1563.11	100	3	15	4723.97		0	0	1978-05-25	1563.11	0	0	20	0	80
1	1978-05-25	140	140	28	54	49	2141.4	0	2	0	6469.26		0	0	1978-05-25	2141.4	0	0	0	0	0
1	1978-05-29	140	125	28	54	50	2183.19	0	2	4	6595.36		41.7825	1.95117	1978-05-25	2141.4	0	0	0	0	0
1	1978-05-30	140	125	28	54	50	2183.19	0	2	5	6595.36		41.7825	1.95117	1978-05-25	2141.4	0	0	0	0	0
1	1978-06-01	265	190	28	54	50	2183.19	0	2	7	6595.36		41.7825	1.95117	1978-05-25	2141.4	0	0	0	0	0
1	1978-06-05	285	205	28	54	50	2183.19	100	2	11	6595.36		41.7825	1.95117	1978-05-25	2141.4	0	0	0	0	100
1	1978-06-09	215	180	28	54	50	2183.19	100	2	15	6595.36		41.7825	1.95117	1978-05-25	2141.4	0	0	0	0	100
1	1978-06-13	215	155	28	54	51	2225.37	100	2	19	6722.68		83.9687	3.9212	1978-05-25	2141.4	0	0	0	0	100
1	1978-06-16	200	150	28	54	51	2225.37	100	3	22	6722.68		83.9687	3.9212	1978-05-25	2141.4	0	0	0	0	100
1	1978-05-25	140	140	29	38	38	1165.87	0	2	0	3525.11		0	0	1978-05-25	1165.87	0	0	0	0	0
1	1978-05-29	140	125	29	38	38	1165.87	100	2	4	3525.11		0	0	1978-05-25	1165.87	0	0	0	0	100
1	1978-05-30	140	125	29	38	38	1165.87	100	2	5	3525.11		0	0	1978-05-25	1165.87	0	0	0	0	100
1	1978-06-01	265	190	29	38	38	1165.87	100	2	7	3525.11		0	0	1978-05-25	1165.87	0	0	0	0	100
1	1978-06-05	285	205	29	38	38	1165.87	100	3	11	3525.11		0	0	1978-05-25	1165.87	0	0	0	0	100
1	1978-05-25	140	140	30	61	53	2623.21	0	2	0	7923.37		0	0	1978-05-25	2623.21	0	0	0	0	0
1	1978-05-29	140	125	30	62	53	2669.44	0	2	4	8062.87		46.2231	1.76208	1978-05-25	2623.21	0	0	0	0	0
1	1978-05-30	140	125	30	62	53	2669.44	0	2	5	8062.87		46.2231	1.76208	1978-05-25	2623.21	0	0	0	0	0
1	1978-06-01	265	190	30	62	55	2763.09	0	2	7	8345.53		139.881	5.33241	1978-05-25	2623.21	0	0	0	0	0
1	1978-06-05	285	205	30	64	55	2858.37	30	2	11	8633.06		235.153	8.9643	1978-05-25	2623.21	0	0	0	0	30
1	1978-06-09	215	180	30	64	55	2858.37	100	2	15	8633.06		235.153	8.9643	1978-05-25	2623.21	0	0	0	0	100
1	1978-06-13	215	155	30	64	55	2858.37	100	3	19	8633.06		235.153	8.9643	1978-05-25	2623.21	0	0	0	0	100
1	1978-05-25	140	125	31	74	66	3956.22	0	2	0	11946.4		0	0	1978-05-25	3956.22	0	0	0	0	0
1	1978-05-29	260	130	31	76	66	4070.06	0	2	4	12289.9		113.842	2.87755	1978-05-25	3956.22	0	0	0	0	0
1	1978-05-30	255	185	31	76	66	4070.06	0	2	5	12289.9		113.842	2.87755	1978-05-25	3956.22	0	0	0	0	0
1	1978-06-01	265	190	31	76	67	4127.59	0	2	7	12463.6		171.369	4.33163	1978-05-25	3956.22	0	0	0	0	0
1	1978-06-05	285	205	31	76	68	4185.52	0	2	11	12638.4		229.299	5.79592	1978-05-25	3956.22	0	0	0	0	0
1	1978-06-09	215	180	31	77	69	4302.59	0	2	15	12991.7		346.371	8.7551	1978-05-25	3956.22	0	0	0	0	0
1	1978-06-13	215	155	31	77	69	4302.59	0	2	19	12991.7		346.371	8.7551	1978-05-25	3956.22	0	0	0	0	0
1	1978-06-16	200	150	31	77	69	4302.59	1	2	22	12991.7		346.371	8.7551	1978-05-25	3956.22	0	0	0	1	0
1	1978-06-20	240	180	31	77	69	4302.59	25	2	26	12991.7		346.371	8.7551	1978-05-25	3956.22	0	0	0	5	20
1	1978-06-23	190	170	31	77	69	4302.59	45	2	29	12991.7		346.371	8.7551	1978-05-25	3956.22	0	0	0	5	40
1	1978-06-27	190	150	31	77	69	4302.59	100	2	33	12991.7		346.371	8.7551	1978-05-25	3956.22	0	0	0	10	90
1	1978-06-30	210	170	31	77	69	4302.59	100	2	36	12991.7		346.371	8.7551	1978-05-25	3956.22	0	0	20	15	65
1	1978-07-04	230	225	31	77	69	4302.59	100	3	40	12991.7		346.371	8.7551	1978-05-25	3956.22	0	0	20	15	65
1	1978-05-25	140	125	32	37	39	1165.87	0	2	0	3525.11		0	0	1978-05-25	1165.87	0	0	0	0	0
1	1978-05-29	260	130	32	37	39	1165.87	0	2	4	3525.11		0	0	1978-05-25	1165.87	0	0	0	0	0
1	1978-05-30	255	185	32	37	39	1165.87	0	2	5	3525.11		0	0	1978-05-25	1165.87	0	0	0	0	0
1	1978-06-01	265	190	32	37	39	1165.87	100	2	7	3525.11		0	0	1978-05-25	1165.87	0	0	0	0	100
1	1978-06-05	285	205	32	38	39	1196.76	100	2	11	3618.31		30.8827	2.64889	1978-05-25	1165.87	0	0	0	0	100
1	1978-06-09	215	180	32	38	39	1196.76	100	2	15	3618.31		30.8827	2.64889	1978-05-25	1165.87	0	0	0	0	100
1	1978-06-13	215	155	32	38	39	1196.76	100	2	19	3618.31		30.8827	2.64889	1978-05-25	1165.87	0	0	0	0	100
1	1978-06-16	200	150	32	38	39	1196.76	100	3	22	3618.31		30.8827	2.64889	1978-05-25	1165.87	0	0	0	0	100
1	1978-05-25	140	125	33	62	55	2763.09	0	2	0	8345.53		0	0	1978-05-25	2763.09	0	0	0	0	0
1	1978-05-29	260	130	33	63	57	2906.61	0	2	4	8778.65		143.514	5.19395	1978-05-25	2763.09	0	0	0	0	0
1	1978-05-30	255	185	33	63	57	2906.61	0	2	5	8778.65		143.514	5.19395	1978-05-25	2763.09	0	0	0	0	0
1	1978-06-01	265	190	33	64	58	3004.3	0	2	7	9073.49		241.208	8.72964	1978-05-25	2763.09	0	0	0	0	0
1	1978-06-05	285	205	33	64	58	3004.3	0	2	11	9073.49		241.208	8.72964	1978-05-25	2763.09	0	0	0	0	0
1	1978-06-09	215	180	33	64	58	3004.3	100	2	15	9073.49		241.208	8.72964	1978-05-25	2763.09	0	0	0	0	100
1	1978-06-13	215	155	33	64	58	3004.3	100	2	19	9073.49		241.208	8.72964	1978-05-25	2763.09	0	0	0	0	100
1	1978-06-16	200	150	33	64	58	3004.3	100	3	22	9073.49		241.208	8.72964	1978-05-25	2763.09	0	0	0	0	100
1	1978-05-25	140	125	34	55	59	2623.21	0	2	0	7923.37		0	0	1978-05-25	2623.21	0	0	0	0	0
1	1978-05-29	260	130	34	57	59	2716.06	0	2	4	8203.59		92.85	3.53955	1978-05-25	2623.21	0	0	0	0	0
1	1978-05-30	255	185	34	57	59	2716.06	0	2	5	8203.59		92.85	3.53955	1978-05-25	2623.21	0	0	0	0	0
1	1978-06-01	265	190	34	58	59	2763.09	0	2	7	8345.53		139.881	5.33241	1978-05-25	2623.21	0	0	0	0	0
1	1978-06-05	285	205	34	58	59	2763.09	70	2	11	8345.53		139.881	5.33241	1978-05-25	2623.21	0	0	0	0	70
1	1978-06-09	215	180	34	58	59	2763.09	100	2	15	8345.53		139.881	5.33241	1978-05-25	2623.21	0	0	50	0	50
1	1978-06-13	215	155	34	58	59	2763.09	100	3	19	8345.53		139.881	5.33241	1978-05-25	2623.21	0	0	50	0	50
1	1978-05-25	140	125	35	41	41	1357.22	0	2	0	4102.61		0	0	1978-05-25	1357.22	0	0	0	0	0
1	1978-05-29	260	130	35	41	41	1357.22	0	2	4	4102.61		0	0	1978-05-25	1357.22	0	0	0	0	0
1	1978-05-30	255	185	35	41	41	1357.22	0	2	5	4102.61		0	0	1978-05-25	1357.22	0	0	0	0	0
1	1978-06-01	265	190	35	41	42	1390.53	100	2	7	4203.12		33.3049	2.4539	1978-05-25	1357.22	0	0	0	0	100
1	1978-06-05	285	205	35	41	42	1390.53	100	2	11	4203.12		33.3049	2.4539	1978-05-25	1357.22	0	0	40	0	60
1	1978-06-09	215	180	35	41	42	1390.53	100	3	15	4203.12		33.3049	2.4539	1978-05-25	1357.22	0	0	40	0	60
1	1978-05-25	140	125	36	46	45	1671.5	0	2	0	5051.1		0	0	1978-05-25	1671.5	0	0	0	0	0
1	1978-05-29	260	130	36	46	45	1671.5	0	2	4	5051.1		0	0	1978-05-25	1671.5	0	0	0	0	0
1	1978-05-30	255	185	36	46	46	1708.44	0	2	5	5162.58		36.9381	2.20988	1978-05-25	1671.5	0	0	0	0	0
1	1978-06-01	265	190	36	46	46	1708.44	100	2	7	5162.58		36.9381	2.20988	1978-05-25	1671.5	0	0	0	0	100
1	1978-06-05	285	205	36	46	46	1708.44	100	3	11	5162.58		36.9381	2.20988	1978-05-25	1671.5	0	0	0	0	100
1	1978-05-25	140	125	37	50	45	1821.68	0	2	0	5504.33		0	0	1978-05-25	1821.68	0	0	0	0	0
1	1978-05-29	260	130	37	50	45	1821.68	0	2	4	5504.33		0	0	1978-05-25	1821.68	0	0	0	0	0
1	1978-05-30	255	185	37	50	45	1821.68	0	2	5	5504.33		0	0	1978-05-25	1821.68	0	0	0	0	0
1	1978-06-01	265	190	37	50	45	1821.68	0	2	7	5504.33		0	0	1978-05-25	1821.68	0	0	0	0	0
1	1978-06-05	285	205	37	50	45	1821.68	80	2	11	5504.33		0	0	1978-05-25	1821.68	0	0	0	0	80
1	1978-06-09	215	180	37	50	46	1860.23	80	2	15	5620.68		38.5529	2.11634	1978-05-25	1821.68	0	0	0	0	80
1	1978-06-13	215	155	37	50	46	1860.23	100	2	19	5620.68		38.5529	2.11634	1978-05-25	1821.68	0	0	75	0	25
1	1978-06-16	200	150	37	50	46	1860.23	100	3	22	5620.68		38.5529	2.11634	1978-05-25	1821.68	0	0	75	0	25
1	1978-05-25	140	125	38	24	25	484.637	100	2	0	1469.14		0	0	1978-05-25	484.637	0	0	0	0	100
1	1978-05-29	260	130	38	24	25	484.637	100	2	4	1469.14		0	0	1978-05-25	484.637	0	0	0	0	100
1	1978-05-30	255	185	38	24	25	484.637	100	2	5	1469.14		0	0	1978-05-25	484.637	0	0	0	0	100
1	1978-06-01	265	190	38	24	25	484.637	100	2	7	1469.14		0	0	1978-05-25	484.637	0	0	50	0	50
1	1978-06-05	285	205	38	24	25	484.637	100	3	11	1469.14		0	0	1978-05-25	484.637	0	0	50	0	50
1	1978-05-25	140	125	39	59	54	2577.39	0	2	0	7785.08		0	0	1978-05-25	2577.39	0	0	0	0	0
1	1978-05-29	260	130	39	61	54	2669.44	0	2	4	8062.87		92.0426	3.57115	1978-05-25	2577.39	0	0	0	0	0
1	1978-05-30	255	185	39	63	54	2763.09	0	2	5	8345.53		185.7	7.20495	1978-05-25	2577.39	0	0	0	0	0
1	1978-06-01	265	190	39	63	54	2763.09	0	2	7	8345.53		185.7	7.20495	1978-05-25	2577.39	0	0	0	0	0
1	1978-06-05	285	205	39	63	54	2763.09	10	2	11	8345.53		185.7	7.20495	1978-05-25	2577.39	0	0	0	0	10
1	1978-06-09	215	180	39	63	54	2763.09	15	2	15	8345.53		185.7	7.20495	1978-05-25	2577.39	0	0	0	0	15
1	1978-06-13	215	155	39	63	54	2763.09	20	2	19	8345.53		185.7	7.20495	1978-05-25	2577.39	0	0	0	0	20
1	1978-06-16	200	150	39	63	54	2763.09	100	2	22	8345.53		185.7	7.20495	1978-05-25	2577.39	0	0	0	0	100
1	1978-06-20	240	180	39	63	54	2763.09	100	2	26	8345.53		185.7	7.20495	1978-05-25	2577.39	0	0	10	0	90
1	1978-06-23	190	170	39	63	54	2763.09	100	2	29	8345.53		185.7	7.20495	1978-05-25	2577.39	0	0	40	0	60
1	1978-06-27	190	150	39	63	54	2763.09	100	3	33	8345.53		185.7	7.20495	1978-05-25	2577.39	0	0	40	0	60
1	1978-05-25	140	125	40	56	52	2354.35	0	2	0	7111.94		0	0	1978-05-25	2354.35	0	0	0	0	0
1	1978-05-29	260	130	40	57	53	2442.36	0	2	4	7377.54		88.0056	3.738	1978-05-25	2354.35	0	0	0	0	0
1	1978-05-30	255	185	40	57	53	2442.36	0	2	5	7377.54		88.0056	3.738	1978-05-25	2354.35	0	0	0	0	0
1	1978-06-01	265	190	40	57	53	2442.36	0	2	7	7377.54		88.0056	3.738	1978-05-25	2354.35	0	0	0	0	0
1	1978-06-05	285	205	40	57	53	2442.36	0	2	11	7377.54		88.0056	3.738	1978-05-25	2354.35	0	0	0	0	0
1	1978-06-09	215	180	40	57	53	2442.36	100	2	15	7377.54		88.0056	3.738	1978-05-25	2354.35	0	0	0	0	100
1	1978-06-13	215	155	40	57	53	2442.36	100	2	19	7377.54		88.0056	3.738	1978-05-25	2354.35	0	0	0	0	100
1	1978-06-16	200	150	40	57	53	2442.36	100	2	22	7377.54		88.0056	3.738	1978-05-25	2354.35	0	0	0	0	100
1	1978-06-20	240	180	40	57	53	2442.36	100	2	26	7377.54		88.0056	3.738	1978-05-25	2354.35	0	0	15	0	85
1	1978-06-23	190	170	40	57	53	2442.36	100	2	29	7377.54		88.0056	3.738	1978-05-25	2354.35	0	0	20	0	80
1	1978-06-27	190	150	40	57	53	2442.36	100	3	33	7377.54		88.0056	3.738	1978-05-25	2354.35	0	0	20	0	80
1	1978-05-25	140	125	41	36	34	989.054	0	2	0	2991.47		0	0	1978-05-25	989.054	0	0	0	0	0
1	1978-05-29	260	130	41	36	34	989.054	0	2	4	2991.47		0	0	1978-05-25	989.054	0	0	0	0	0
1	1978-05-30	255	185	41	37	34	1017.51	0	2	5	3077.37		28.4605	2.87755	1978-05-25	989.054	0	0	0	0	0
1	1978-06-01	265	190	41	37	34	1017.51	0	2	7	3077.37		28.4605	2.87755	1978-05-25	989.054	0	0	0	0	0
1	1978-06-05	285	205	41	37	35	1046.38	100	2	11	3164.48		57.3248	5.79592	1978-05-25	989.054	0	0	20	0	80
1	1978-06-09	215	180	41	37	35	1046.38	100	3	15	3164.48		57.3248	5.79592	1978-05-25	989.054	0	0	20	0	80
1	1978-05-25	140	125	42	44	39	1390.53	0	2	0	4203.12		0	0	1978-05-25	1390.53	0	0	0	0	0
1	1978-05-29	260	130	42	44	39	1390.53	0	2	4	4203.12		0	0	1978-05-25	1390.53	0	0	0	0	0
1	1978-05-30	255	185	42	44	39	1390.53	0	2	5	4203.12		0	0	1978-05-25	1390.53	0	0	0	0	0
1	1978-06-01	265	190	42	44	39	1390.53	0	2	7	4203.12		0	0	1978-05-25	1390.53	0	0	0	0	0
1	1978-06-05	285	205	42	44	39	1390.53	100	2	11	4203.12		0	0	1978-05-25	1390.53	0	0	0	0	100
1	1978-06-09	215	180	42	44	39	1390.53	100	2	15	4203.12		0	0	1978-05-25	1390.53	0	0	90	0	10
1	1978-06-13	215	155	42	44	39	1390.53	100	3	19	4203.12		0	0	1978-05-25	1390.53	0	0	90	0	10
1	1978-05-25	140	125	43	32	35	906.095	0	2	0	2741.1		0	0	1978-05-25	906.095	0	0	0	0	0
1	1978-05-29	260	130	43	33	35	933.344	100	2	4	2823.34		27.2495	3.00735	1978-05-25	906.095	0	0	0	0	100
1	1978-05-30	255	185	43	33	35	933.344	100	2	5	2823.34		27.2495	3.00735	1978-05-25	906.095	0	0	0	0	100
1	1978-06-01	265	190	43	33	35	933.344	100	2	7	2823.34		27.2495	3.00735	1978-05-25	906.095	0	0	0	0	100
1	1978-06-05	285	205	43	33	35	933.344	100	3	11	2823.34		27.2495	3.00735	1978-05-25	906.095	0	0	0	0	100
1	1978-05-25	140	125	44	54	54	2354.35	0	2	0	7111.94		0	0	1978-05-25	2354.35	0	0	0	0	0
1	1978-05-29	260	130	44	54	54	2354.35	0	2	4	7111.94		0	0	1978-05-25	2354.35	0	0	0	0	0
1	1978-05-30	255	185	44	54	54	2354.35	0	2	5	7111.94		0	0	1978-05-25	2354.35	0	0	0	0	0
1	1978-06-01	265	190	44	55	54	2398.15	0	2	7	7244.13		43.801	1.86043	1978-05-25	2354.35	0	0	0	0	0
1	1978-06-05	285	205	44	55	54	2398.15	0	2	11	7244.13		43.801	1.86043	1978-05-25	2354.35	0	0	0	0	0
1	1978-06-09	215	180	44	55	55	2442.36	100	2	15	7377.54		88.0056	3.738	1978-05-25	2354.35	0	0	0	0	100
1	1978-06-13	215	155	44	55	55	2442.36	100	2	19	7377.54		88.0056	3.738	1978-05-25	2354.35	0	0	0	0	100
1	1978-06-16	200	150	44	55	55	2442.36	100	3	22	7377.54		88.0056	3.738	1978-05-25	2354.35	0	0	0	0	100
1	1978-05-25	140	125	45	23	24	445.882	0	2	0	1352.18		0	0	1978-05-25	445.882	0	0	0	0	0
1	1978-05-29	260	130	45	24	24	465.057	100	2	4	1410.05		19.1755	4.30059	1978-05-25	445.882	0	0	0	0	100
1	1978-05-30	255	185	45	24	24	465.057	100	2	5	1410.05		19.1755	4.30059	1978-05-25	445.882	0	0	0	0	100
1	1978-06-01	265	190	45	24	24	465.057	100	3	7	1410.05		19.1755	4.30059	1978-05-25	445.882	0	0	0	0	100
1	1978-05-25	140	140	46	46	67	2577.39	0	2	0	7785.08		0	0	1978-05-25	2577.39	0	0	0	0	0
1	1978-05-29	140	125	46	53	68	2955.25	0	2	4	8925.46		377.859	14.6605	1978-05-25	2577.39	0	0	0	0	0
1	1978-05-30	140	125	46	54	68	3004.3	0	2	5	9073.49		426.908	16.5636	1978-05-25	2577.39	0	0	0	0	0
1	1978-06-01	265	190	46	54	69	3053.76	0	2	7	9222.74		476.361	18.4823	1978-05-25	2577.39	0	0	0	0	0
1	1978-06-05	285	205	46	54	69	3053.76	0	2	11	9222.74		476.361	18.4823	1978-05-25	2577.39	0	0	0	0	0
1	1978-06-09	215	180	46	55	70	3153.87	0	2	15	9524.89		576.477	22.3667	1978-05-25	2577.39	0	0	0	0	0
1	1978-06-13	215	155	46	55	70	3153.87	0	2	19	9524.89		576.477	22.3667	1978-05-25	2577.39	0	0	0	0	0
1	1978-06-16	200	150	46	55	70	3153.87	0	2	22	9524.89		576.477	22.3667	1978-05-25	2577.39	0	0	0	0	0
1	1978-06-20	240	180	46	55	70	3153.87	20	2	26	9524.89		576.477	22.3667	1978-05-25	2577.39	0	0	0	0	20
1	1978-06-23	190	170	46	56	70	3204.54	100	2	29	9677.79		627.141	24.3324	1978-05-25	2577.39	0	0	0	0	100
1	1978-06-27	190	150	46	56	70	3204.54	100	2	33	9677.79		627.141	24.3324	1978-05-25	2577.39	0	0	5	0	95
1	1978-06-30	210	170	46	56	70	3204.54	100	2	36	9677.79		627.141	24.3324	1978-05-25	2577.39	0	0	20	0	80
1	1978-07-04	230	225	46	56	70	3204.54	100	3	40	9677.79		627.141	24.3324	1978-05-25	2577.39	0	0	20	0	80
1	1978-05-25	140	140	47	59	54	2577.39	0	2	0	7785.08		0	0	1978-05-25	2577.39	0	0	0	0	0
1	1978-05-29	140	125	47	59	55	2623.21	0	2	4	7923.37		45.8195	1.77774	1978-05-25	2577.39	0	0	0	0	0
1	1978-05-30	140	125	47	59	55	2623.21	0	2	5	7923.37		45.8195	1.77774	1978-05-25	2577.39	0	0	0	0	0
1	1978-06-01	265	190	47	59	56	2669.44	0	2	7	8062.87		92.0426	3.57115	1978-05-25	2577.39	0	0	0	0	0
1	1978-06-05	285	205	47	59	56	2669.44	0	2	11	8062.87		92.0426	3.57115	1978-05-25	2577.39	0	0	0	0	0
1	1978-06-09	215	180	47	59	56	2669.44	50	2	15	8062.87		92.0426	3.57115	1978-05-25	2577.39	0	0	0	0	50
1	1978-06-13	215	155	47	59	56	2669.44	60	2	19	8062.87		92.0426	3.57115	1978-05-25	2577.39	0	0	0	0	60
1	1978-06-16	200	150	47	59	56	2669.44	100	2	22	8062.87		92.0426	3.57115	1978-05-25	2577.39	0	0	50	0	50
1	1978-06-20	240	180	47	59	56	2669.44	100	3	26	8062.87		92.0426	3.57115	1978-05-25	2577.39	0	0	50	0	50
1	1978-05-25	140	140	48	40	40	1291.83	0	2	0	3905.24		0	0	1978-05-25	1291.83	0	0	0	0	0
1	1978-05-29	140	125	48	41	40	1324.32	100	2	4	4003.31		32.4975	2.51563	1978-05-25	1291.83	0	0	0	0	100
1	1978-05-30	140	125	48	41	40	1324.32	100	2	5	4003.31		32.4975	2.51563	1978-05-25	1291.83	0	0	0	0	100
1	1978-06-01	265	190	48	42	41	1390.53	100	2	7	4203.12		98.7036	7.64062	1978-05-25	1291.83	0	0	0	0	100
1	1978-06-05	285	205	48	42	41	1390.53	100	2	11	4203.12		98.7036	7.64062	1978-05-25	1291.83	0	0	70	0	30
1	1978-06-09	215	180	48	42	41	1390.53	100	3	15	4203.12		98.7036	7.64062	1978-05-25	1291.83	0	0	70	0	30
1	1978-05-25	140	140	49	36	36	1046.38	0	2	0	3164.48		0	0	1978-05-25	1046.38	0	0	0	0	0
1	1978-05-29	140	125	49	36	36	1046.38	100	2	4	3164.48		0	0	1978-05-25	1046.38	0	0	0	0	100
1	1978-05-30	140	125	49	36	36	1046.38	100	2	5	3164.48		0	0	1978-05-25	1046.38	0	0	0	0	100
1	1978-06-01	265	190	49	36	36	1046.38	100	2	7	3164.48		0	0	1978-05-25	1046.38	0	0	3	0	97
1	1978-06-05	285	205	49	36	36	1046.38	100	3	11	3164.48		0	0	1978-05-25	1046.38	0	0	3	0	97
1	1978-05-25	140	140	50	64	54	2810.53	0	2	0	8488.68		0	0	1978-05-25	2810.53	0	0	0	0	0
1	1978-05-29	140	125	50	64	56	2906.61	0	2	4	8778.65		96.0796	3.41856	1978-05-25	2810.53	0	0	0	0	0
1	1978-05-30	140	125	50	64	56	2906.61	0	2	5	8778.65		96.0796	3.41856	1978-05-25	2810.53	0	0	0	0	0
1	1978-06-01	265	190	50	64	56	2906.61	0	2	7	8778.65		96.0796	3.41856	1978-05-25	2810.53	0	0	0	0	0
1	1978-06-05	285	205	50	64	56	2906.61	0	2	11	8778.65		96.0796	3.41856	1978-05-25	2810.53	0	0	0	0	0
1	1978-06-09	215	180	50	64	56	2906.61	0	2	15	8778.65		96.0796	3.41856	1978-05-25	2810.53	0	0	0	0	0
1	1978-06-13	215	155	50	64	56	2906.61	100	2	19	8778.65		96.0796	3.41856	1978-05-25	2810.53	0	0	0	0	100
1	1978-06-16	200	150	50	64	57	2955.25	100	2	22	8925.46		144.725	5.14938	1978-05-25	2810.53	0	0	0	0	100
1	1978-06-20	240	180	50	64	57	2955.25	100	2	26	8925.46		144.725	5.14938	1978-05-25	2810.53	0	0	0	0	100
1	1978-06-23	190	170	50	64	57	2955.25	100	2	29	8925.46		144.725	5.14938	1978-05-25	2810.53	0	0	20	0	80
1	1978-06-27	190	150	50	64	57	2955.25	100	2	33	8925.46		144.725	5.14938	1978-05-25	2810.53	0	0	80	0	20
1	1978-06-30	210	170	50	64	57	2955.25	100	3	36	8925.46		144.725	5.14938	1978-05-25	2810.53	0	0	80	0	20
1	1978-05-25	140	125	51	52	48	2018.48	0	2	0	6098.27		0	0	1978-05-25	2018.48	0	0	0	0	0
1	1978-05-29	260	130	51	54	48	2100.02	0	2	4	6344.38		81.5465	4.04	1978-05-25	2018.48	0	0	0	0	0
1	1978-05-30	255	185	51	54	48	2100.02	0	2	5	6344.38		81.5465	4.04	1978-05-25	2018.48	0	0	0	0	0
1	1978-06-01	265	190	51	54	48	2100.02	0	2	7	6344.38		81.5465	4.04	1978-05-25	2018.48	0	0	0	0	0
1	1978-06-05	285	205	51	54	49	2141.4	0	2	11	6469.26		122.925	6.09	1978-05-25	2018.48	0	0	0	0	0
1	1978-06-09	215	180	51	54	51	2225.37	0	2	15	6722.68		206.894	10.25	1978-05-25	2018.48	0	0	0	0	0
1	1978-06-13	215	155	51	54	51	2225.37	0	2	19	6722.68		206.894	10.25	1978-05-25	2018.48	0	0	0	0	0
1	1978-06-16	200	150	51	55	51	2267.96	50	2	22	6851.21		249.484	12.36	1978-05-25	2018.48	0	0	0	0	50
1	1978-06-20	240	180	51	55	51	2267.96	50	2	26	6851.21		249.484	12.36	1978-05-25	2018.48	0	0	0	0	50
1	1978-06-23	190	170	51	55	51	2267.96	100	2	29	6851.21		249.484	12.36	1978-05-25	2018.48	0	0	0	0	100
1	1978-06-27	190	150	51	55	51	2267.96	100	2	33	6851.21		249.484	12.36	1978-05-25	2018.48	0	0	0	0	100
1	1978-06-30	210	170	51	55	51	2267.96	100	2	36	6851.21		249.484	12.36	1978-05-25	2018.48	0	0	10	0	90
1	1978-07-04	230	225	51	55	51	2267.96	100	2	40	6851.21		249.484	12.36	1978-05-25	2018.48	0	0	60	0	40
1	1978-07-07	245	230	51	55	51	2267.96	100	3	43	6851.21		249.484	12.36	1978-05-25	2018.48	0	0	60	0	40
1	1978-05-25	140	125	52	29	30	702.632	0	2	0	2127.05		0	0	1978-05-25	702.632	0	0	0	0	0
1	1978-05-29	260	130	52	30	30	726.652	100	2	4	2199.54		24.0199	3.41856	1978-05-25	702.632	0	0	0	0	100
1	1978-05-30	255	185	52	30	30	726.652	100	2	5	2199.54		24.0199	3.41856	1978-05-25	702.632	0	0	0	0	100
1	1978-06-01	265	190	52	30	31	751.076	100	2	7	2273.25		48.4435	6.89457	1978-05-25	702.632	0	0	0	0	100
1	1978-06-05	285	205	52	30	31	751.076	100	3	11	2273.25		48.4435	6.89457	1978-05-25	702.632	0	0	0	0	100
1	1978-05-25	140	125	53	33	40	1075.65	0	2	0	3252.81		0	0	1978-05-25	1075.65	0	0	0	0	0
1	1978-05-29	260	130	53	33	40	1075.65	0	2	4	3252.81		0	0	1978-05-25	1075.65	0	0	0	0	0
1	1978-05-30	255	185	53	33	41	1105.32	0	2	5	3342.36		29.6716	2.75849	1978-05-25	1075.65	0	0	0	0	0
1	1978-06-01	265	190	53	33	41	1105.32	100	2	7	3342.36		29.6716	2.75849	1978-05-25	1075.65	0	0	0	0	100
1	1978-06-05	285	205	53	33	41	1105.32	100	2	11	3342.36		29.6716	2.75849	1978-05-25	1075.65	0	0	0	0	100
1	1978-06-09	215	180	53	33	41	1105.32	100	2	15	3342.36		29.6716	2.75849	1978-05-25	1075.65	0	0	0	0	100
1	1978-06-13	215	155	53	33	41	1105.32	100	3	19	3342.36		29.6716	2.75849	1978-05-25	1075.65	0	0	0	0	100
1	1978-05-25	140	125	54	60	55	2669.44	0	2	0	8062.87		0	0	1978-05-25	2669.44	0	0	0	0	0
1	1978-05-29	260	130	54	60	55	2669.44	0	2	4	8062.87		0	0	1978-05-25	2669.44	0	0	0	0	0
1	1978-05-30	255	185	54	61	56	2763.09	0	2	5	8345.53		93.6574	3.50851	1978-05-25	2669.44	0	0	0	0	0
1	1978-06-01	265	190	54	61	58	2858.37	0	2	7	8633.06		188.93	7.0775	1978-05-25	2669.44	0	0	0	0	0
1	1978-06-05	285	205	54	61	58	2858.37	0	3	11	8633.06		188.93	7.0775	1978-05-25	2669.44	0	0	0	0	0
1	1978-05-25	140	125	55	50	50	2018.48	0	2	0	6098.27		0	0	1978-05-25	2018.48	0	0	0	0	0
1	1978-05-29	260	130	55	50	50	2018.48	0	2	4	6098.27		0	0	1978-05-25	2018.48	0	0	0	0	0
1	1978-05-30	255	185	55	51	50	2059.05	0	2	5	6220.72		40.5714	2.01	1978-05-25	2018.48	0	0	0	0	0
1	1978-06-01	265	190	55	52	50	2100.02	0	2	7	6344.38		81.5465	4.04	1978-05-25	2018.48	0	0	0	0	0
1	1978-06-05	285	205	55	54	51	2225.37	100	2	11	6722.68		206.894	10.25	1978-05-25	2018.48	0	0	0	0	100
1	1978-06-09	215	180	55	54	51	2225.37	100	2	15	6722.68		206.894	10.25	1978-05-25	2018.48	0	0	0	0	100
1	1978-06-13	215	155	55	54	51	2225.37	100	3	19	6722.68		206.894	10.25	1978-05-25	2018.48	0	0	0	0	100
1	1978-05-25	140	125	56	40	43	1390.53	0	2	0	4203.12		0	0	1978-05-25	1390.53	0	0	0	0	0
1	1978-05-29	260	130	56	41	42	1390.53	0	2	4	4203.12		0	0	1978-05-25	1390.53	0	0	0	0	0
1	1978-05-30	255	185	56	42	43	1458.35	0	2	5	4407.81		67.8209	4.87734	1978-05-25	1390.53	0	0	0	0	0
1	1978-06-01	265	190	56	42	43	1458.35	0	2	7	4407.81		67.8209	4.87734	1978-05-25	1390.53	0	0	0	0	0
1	1978-06-05	285	205	56	42	43	1458.35	30	2	11	4407.81		67.8209	4.87734	1978-05-25	1390.53	0	0	0	0	30
1	1978-06-09	215	180	56	42	43	1458.35	100	2	15	4407.81		67.8209	4.87734	1978-05-25	1390.53	0	0	0	0	100
1	1978-06-13	215	155	56	42	43	1458.35	100	3	19	4407.81		67.8209	4.87734	1978-05-25	1390.53	0	0	0	0	100
1	1978-05-25	140	125	57	55	50	2225.37	0	2	0	6722.68		0	0	1978-05-25	2225.37	0	0	0	0	0
1	1978-05-29	260	130	57	55	50	2225.37	0	2	4	6722.68		0	0	1978-05-25	2225.37	0	0	0	0	0
1	1978-05-30	255	185	57	55	50	2225.37	0	2	5	6722.68		0	0	1978-05-25	2225.37	0	0	0	0	0
1	1978-06-01	265	190	57	55	50	2225.37	0	2	7	6722.68		0	0	1978-05-25	2225.37	0	0	0	0	0
1	1978-06-05	285	205	57	55	50	2225.37	0	2	11	6722.68		0	0	1978-05-25	2225.37	0	0	0	0	0
1	1978-06-09	215	180	57	55	50	2225.37	0	3	15	6722.68		0	0	1978-05-25	2225.37	0	0	0	0	0
1	1978-05-25	140	125	58	47	47	1783.53	0	2	0	5389.19		0	0	1978-05-25	1783.53	0	0	0	0	0
1	1978-05-29	260	130	58	47	47	1783.53	0	2	4	5389.19		0	0	1978-05-25	1783.53	0	0	0	0	0
1	1978-05-30	255	185	58	47	47	1783.53	0	2	5	5389.19		0	0	1978-05-25	1783.53	0	0	0	0	0
1	1978-06-01	265	190	58	47	47	1783.53	0	2	7	5389.19		0	0	1978-05-25	1783.53	0	0	0	0	0
1	1978-06-05	285	205	58	47	47	1783.53	0	2	11	5389.19		0	0	1978-05-25	1783.53	0	0	0	0	0
1	1978-06-09	215	180	58	47	47	1783.53	100	2	15	5389.19		0	0	1978-05-25	1783.53	0	0	0	0	100
1	1978-06-13	215	155	58	47	47	1783.53	100	2	19	5389.19		0	0	1978-05-25	1783.53	0	0	0	0	100
1	1978-06-16	200	150	58	47	47	1783.53	100	2	22	5389.19		0	0	1978-05-25	1783.53	0	0	0	0	100
1	1978-06-20	240	180	58	47	47	1783.53	100	2	26	5389.19		0	0	1978-05-25	1783.53	0	0	15	0	85
1	1978-06-23	190	170	58	47	47	1783.53	100	3	29	5389.19		0	0	1978-05-25	1783.53	0	0	15	0	85
1	1978-05-25	140	125	59	53	48	2059.05	0	2	0	6220.72		0	0	1978-05-25	2059.05	0	0	0	0	0
1	1978-05-29	260	130	59	60	53	2577.39	0	2	4	7785.08		518.345	25.174	1978-05-25	2059.05	0	0	0	0	0
1	1978-05-30	255	185	59	61	55	2716.06	0	2	5	8203.59		657.015	31.9086	1978-05-25	2059.05	0	0	0	0	0
1	1978-06-01	265	190	59	62	57	2858.37	0	2	7	8633.06		799.317	38.8197	1978-05-25	2059.05	0	0	0	0	0
1	1978-06-05	285	205	59	65	59	3103.61	0	2	11	9373.21		1044.56	50.7303	1978-05-25	2059.05	0	0	0	0	0
1	1978-06-09	215	180	59	65	60	3153.87	0	2	15	9524.89		1094.82	53.1713	1978-05-25	2059.05	0	0	0	0	0
1	1978-06-13	215	155	59	65	60	3153.87	0	2	19	9524.89		1094.82	53.1713	1978-05-25	2059.05	0	0	0	0	0
1	1978-06-16	200	150	59	65	60	3153.87	0	2	22	9524.89		1094.82	53.1713	1978-05-25	2059.05	0	0	0	0	0
1	1978-06-20	240	180	59	65	61	3204.54	40	2	26	9677.79		1145.49	55.6318	1978-05-25	2059.05	0	0	0	0	40
1	1978-06-23	190	170	59	65	61	3204.54	40	2	29	9677.79		1145.49	55.6318	1978-05-25	2059.05	0	0	0	0	40
1	1978-06-27	190	150	59	65	61	3204.54	100	2	33	9677.79		1145.49	55.6318	1978-05-25	2059.05	0	0	30	0	70
1	1978-06-30	210	170	59	65	61	3204.54	100	3	36	9677.79		1145.49	55.6318	1978-05-25	2059.05	0	0	30	0	70
1	1978-05-25	140	125	60	43	40	1390.53	0	2	0	4203.12		0	0	1978-05-25	1390.53	0	0	0	0	0
1	1978-05-29	260	130	60	44	40	1424.24	0	2	4	4304.86		33.7086	2.42415	1978-05-25	1390.53	0	0	0	0	0
1	1978-05-30	255	185	60	44	41	1458.35	100	2	5	4407.81		67.8209	4.87734	1978-05-25	1390.53	0	0	0	0	100
1	1978-06-01	265	190	60	44	41	1458.35	100	2	7	4407.81		67.8209	4.87734	1978-05-25	1390.53	0	0	0	0	100
1	1978-06-05	285	205	60	44	41	1458.35	100	3	11	4407.81		67.8209	4.87734	1978-05-25	1390.53	0	0	0	0	100
1	1978-05-25	140	125	61	56	57	2577.39	0	2	0	7785.08		0	0	1978-05-25	2577.39	0	0	0	0	0
1	1978-05-29	260	130	61	57	57	2623.21	20	2	4	7923.37		45.8195	1.77774	1978-05-25	2577.39	0	0	0	0	20
1	1978-05-30	255	185	61	57	57	2623.21	40	2	5	7923.37		45.8195	1.77774	1978-05-25	2577.39	0	0	0	0	40
1	1978-06-01	265	190	61	57	57	2623.21	100	2	7	7923.37		45.8195	1.77774	1978-05-25	2577.39	0	0	0	0	100
1	1978-06-05	285	205	61	57	57	2623.21	100	2	11	7923.37		45.8195	1.77774	1978-05-25	2577.39	0	0	0	0	100		?? V
1	1978-06-09	215	180	61	58	58	2716.06	100	2	15	8203.59		138.669	5.38022	1978-05-25	2577.39	0	0	0	0	100
1	1978-06-13	215	155	61	58	58	2716.06	100	3	19	8203.59		138.669	5.38022	1978-05-25	2577.39	0	0	0	0	100
1	1978-05-25	140	125	62	37	35	1046.38	0	2	0	3164.48		0	0	1978-05-25	1046.38	0	0	0	0	0
1	1978-05-29	260	130	62	37	36	1075.65	0	2	4	3252.81		29.2679	2.79707	1978-05-25	1046.38	0	0	0	0	0
1	1978-05-30	255	185	62	37	36	1075.65	0	2	5	3252.81		29.2679	2.79707	1978-05-25	1046.38	0	0	0	0	0
1	1978-06-01	265	190	62	37	36	1075.65	100	2	7	3252.81		29.2679	2.79707	1978-05-25	1046.38	0	0	0	0	100
1	1978-06-05	285	205	62	37	36	1075.65	100	3	11	3252.81		29.2679	2.79707	1978-05-25	1046.38	0	0	0	0	100
1	1978-05-25	140	125	63	54	49	2141.4	0	2	0	6469.26		0	0	1978-05-25	2141.4	0	0	0	0	0
1	1978-05-29	260	130	63	54	49	2141.4	0	2	4	6469.26		0	0	1978-05-25	2141.4	0	0	0	0	0
1	1978-05-30	255	185	63	54	50	2183.19	0	2	5	6595.36		41.7825	1.95117	1978-05-25	2141.4	0	0	0	0	0
1	1978-06-01	265	190	63	54	50	2183.19	0	2	7	6595.36		41.7825	1.95117	1978-05-25	2141.4	0	0	0	0	0
1	1978-06-05	285	205	63	54	50	2183.19	0	2	11	6595.36		41.7825	1.95117	1978-05-25	2141.4	0	0	0	0	0
1	1978-06-09	215	180	63	55	50	2225.37	0	2	15	6722.68		83.9687	3.9212	1978-05-25	2141.4	0	0	0	0	0
1	1978-06-13	215	155	63	56	50	2267.96	0	2	19	6851.21		126.559	5.91008	1978-05-25	2141.4	0	0	0	0	0
1	1978-06-16	200	150	63	56	51	2310.96	100	2	22	6980.97		169.552	7.91781	1978-05-25	2141.4	0	0	5	0	95
1	1978-06-20	240	180	63	56	51	2310.96	100	2	26	6980.97		169.552	7.91781	1978-05-25	2141.4	0	0	5	0	95
1	1978-06-23	190	170	63	56	51	2310.96	100	2	29	6980.97		169.552	7.91781	1978-05-25	2141.4	0	0	5	0	95
1	1978-06-27	190	150	63	56	51	2310.96	100	2	33	6980.97		169.552	7.91781	1978-05-25	2141.4	0	0	15	0	85
1	1978-06-30	210	170	63	56	51	2310.96	100	2	36	6980.97		169.552	7.91781	1978-05-25	2141.4	0	0	15	0	85
1	1978-07-04	230	225	63	56	51	2310.96	100	2	40	6980.97		169.552	7.91781	1978-05-25	2141.4	0	0	40	0	60
1	1978-07-07	245	230	63	56	51	2310.96	100	3	43	6980.97		169.552	7.91781	1978-05-25	2141.4	0	0	40	0	60
1	1978-05-25	140	125	64	27	25	545.796	100	2	0	1653.72		0	0	1978-05-25	545.796	0	0	0	0	100
1	1978-05-29	260	130	64	27	25	545.796	100	2	4	1653.72		0	0	1978-05-25	545.796	0	0	0	0	100
1	1978-05-30	255	185	64	27	25	545.796	100	2	5	1653.72		0	0	1978-05-25	545.796	0	0	0	0	100
1	1978-06-01	265	190	64	27	25	545.796	100	2	7	1653.72		0	0	1978-05-25	545.796	0	0	80	0	20
1	1978-06-05	285	205	64	27	25	545.796	100	3	11	1653.72		0	0	1978-05-25	545.796	0	0	80	0	20
1	1978-05-25	140	125	65	25	25	504.62	100	2	0	1529.45		0	0	1978-05-25	504.62	0	0	0	0	100
1	1978-05-29	260	130	65	25	25	504.62	100	2	4	1529.45		0	0	1978-05-25	504.62	0	0	0	0	100
1	1978-05-30	255	185	65	25	25	504.62	100	2	5	1529.45		0	0	1978-05-25	504.62	0	0	0	0	100
1	1978-06-01	265	190	65	25	25	504.62	100	2	7	1529.45		0	0	1978-05-25	504.62	0	0	90	0	10
1	1978-06-05	285	205	65	25	25	504.62	100	3	11	1529.45		0	0	1978-05-25	504.62	0	0	90	0	10
1	1978-05-25	140	125	66	21	20	339.306	100	2	0	1030.53		0	0	1978-05-25	339.306	0	0	0	0	100
1	1978-05-29	260	130	66	21	20	339.306	100	2	4	1030.53		0	0	1978-05-25	339.306	0	0	0	0	100
1	1978-05-30	255	185	66	21	20	339.306	100	2	5	1030.53		0	0	1978-05-25	339.306	0	0	0	0	100
1	1978-06-01	265	190	66	21	20	339.306	100	2	7	1030.53		0	0	1978-05-25	339.306	0	0	90	0	10
1	1978-06-05	285	205	66	21	20	339.306	100	3	11	1030.53		0	0	1978-05-25	339.306	0	0	90	0	10
1	1978-05-25	140	125	67	34	33	906.095	0	2	0	2741.1		0	0	1978-05-25	906.095	0	0	0	0	0
1	1978-05-29	260	130	67	34	34	933.344	0	2	4	2823.34		27.2495	3.00735	1978-05-25	906.095	0	0	0	0	0
1	1978-05-30	255	185	67	34	35	960.997	0	2	5	2906.8		54.9026	6.05926	1978-05-25	906.095	0	0	0	0	0
1	1978-06-01	265	190	67	34	35	960.997	0	2	7	2906.8		54.9026	6.05926	1978-05-25	906.095	0	0	0	0	0
1	1978-06-05	285	205	67	34	35	960.997	10	2	11	2906.8		54.9026	6.05926	1978-05-25	906.095	0	0	0	0	10
1	1978-06-09	215	180	67	34	35	960.997	100	2	15	2906.8		54.9026	6.05926	1978-05-25	906.095	0	0	0	0	100
1	1978-06-13	215	155	67	34	35	960.997	100	3	19	2906.8		54.9026	6.05926	1978-05-25	906.095	0	0	0	0	100
1	1978-05-25	140	125	68	53	46	1978.31	0	2	0	5977.05		0	0	1978-05-25	1978.31	0	0	0	0	0
1	1978-05-29	260	130	68	53	46	1978.31	0	2	4	5977.05		0	0	1978-05-25	1978.31	0	0	0	0	0
1	1978-05-30	255	185	68	53	47	2018.48	0	2	5	6098.27		40.1677	2.03041	1978-05-25	1978.31	0	0	0	0	0
1	1978-06-01	265	190	68	53	47	2018.48	0	2	7	6098.27		40.1677	2.03041	1978-05-25	1978.31	0	0	0	0	0
1	1978-06-05	285	205	68	53	47	2018.48	0	2	11	6098.27		40.1677	2.03041	1978-05-25	1978.31	0	0	0	0	0
1	1978-06-09	215	180	68	53	48	2059.05	0	2	15	6220.72		80.7391	4.08122	1978-05-25	1978.31	0	0	0	0	0
1	1978-06-13	215	155	68	53	48	2059.05	0	2	19	6220.72		80.7391	4.08122	1978-05-25	1978.31	0	0	0	0	0
1	1978-06-16	200	150	68	53	48	2059.05	0	3	22	6220.72		80.7391	4.08122	1978-05-25	1978.31	0	0	0	0	0
1	1978-05-25	140	125	69	38	39	1196.76	0	2	0	3618.31		0	0	1978-05-25	1196.76	0	0	0	0	0
1	1978-05-29	260	130	69	40	39	1259.73	0	2	4	3808.38		62.9765	5.26227	1978-05-25	1196.76	0	0	0	0	0
1	1978-05-30	255	185	69	40	40	1291.83	0	2	5	3905.24		95.0703	7.944	1978-05-25	1196.76	0	0	0	0	0
1	1978-06-01	265	190	69	41	40	1324.32	100	2	7	4003.31		127.568	10.6595	1978-05-25	1196.76	0	0	0	0	100
1	1978-06-05	285	205	69	41	40	1324.32	100	2	11	4003.31		127.568	10.6595	1978-05-25	1196.76	0	0	0	0	100
1	1978-06-09	215	180	69	41	40	1324.32	100	3	15	4003.31		127.568	10.6595	1978-05-25	1196.76	0	0	0	0	100
1	1978-05-25	140	125	70	45	45	1634.97	0	2	0	4940.84		0	0	1978-05-25	1634.97	0	0	0	0	0
1	1978-05-29	260	130	70	45	45	1634.97	0	2	4	4940.84		0	0	1978-05-25	1634.97	0	0	0	0	0
1	1978-05-30	255	185	70	45	45	1634.97	95	2	5	4940.84		0	0	1978-05-25	1634.97	0	95	0	0	0
1	1978-06-01	265	190	70	45	45	1634.97	95	2	7	4940.84		0	0	1978-05-25	1634.97	0	95	0	0	0
1	1978-06-05	285	205	70	45	45	1634.97	95	3	11	4940.84		0	0	1978-05-25	1634.97	0	95	0	0	0
1	1978-05-25	140	125	71	57	50	2310.96	0	2	0	6980.97		0	0	1978-05-25	2310.96	0	0	0	0	0
1	1978-05-29	260	130	71	58	50	2354.35	0	2	4	7111.94		43.3973	1.87789	1978-05-25	2310.96	0	0	0	0	0
1	1978-05-30	255	185	71	58	51	2398.15	0	2	5	7244.13		87.1982	3.77326	1978-05-25	2310.96	0	0	0	0	0
1	1978-06-01	265	190	71	58	51	2398.15	0	2	7	7244.13		87.1982	3.77326	1978-05-25	2310.96	0	0	0	0	0
1	1978-06-05	285	205	71	58	52	2442.36	0	2	11	7377.54		131.403	5.68609	1978-05-25	2310.96	0	0	0	0	0
1	1978-06-09	215	180	71	58	53	2486.97	0	2	15	7512.17		176.011	7.61639	1978-05-25	2310.96	0	0	0	0	0
1	1978-06-13	215	155	71	58	53	2486.97	0	3	19	7512.17		176.011	7.61639	1978-05-25	2310.96	0	0	0	0	0
1	1978-05-25	140	125	72	50	46	1860.23	0	2	0	5620.68		0	0	1978-05-25	1860.23	0	0	0	0	0
1	1978-05-29	260	130	72	50	46	1860.23	0	2	4	5620.68		0	0	1978-05-25	1860.23	0	0	0	0	0
1	1978-05-30	255	185	72	50	46	1860.23	0	2	5	5620.68		0	0	1978-05-25	1860.23	0	0	0	0	0
1	1978-06-01	265	190	72	50	47	1899.19	20	2	7	5738.25		38.9566	2.09418	1978-05-25	1860.23	0	0	0	0	20
1	1978-06-05	285	205	72	50	47	1899.19	70	2	11	5738.25		38.9566	2.09418	1978-05-25	1860.23	0	0	0	0	70
1	1978-06-09	215	180	72	50	47	1899.19	70	3	15	5738.25		38.9566	2.09418	1978-05-25	1860.23	0	0	0	0	70
1	1978-05-25	140	125	73	54	50	2183.19	0	2	0	6595.36		0	0	1978-05-25	2183.19	0	0	0	0	0
1	1978-05-29	260	130	73	59	58	2763.09	0	2	4	8345.53		579.909	26.5625	1978-05-25	2183.19	0	0	0	0	0
1	1978-05-30	255	185	73	60	58	2810.53	0	2	5	8488.68		627.343	28.7352	1978-05-25	2183.19	0	0	0	0	0
1	1978-06-01	265	190	73	60	58	2810.53	0	2	7	8488.68		627.343	28.7352	1978-05-25	2183.19	0	0	0	0	0
1	1978-06-05	285	205	73	60	58	2810.53	0	2	11	8488.68		627.343	28.7352	1978-05-25	2183.19	0	0	0	0	0
1	1978-06-09	215	180	73	60	58	2810.53	0	2	15	8488.68		627.343	28.7352	1978-05-25	2183.19	0	0	0	0	0
1	1978-06-13	215	155	73	60	58	2810.53	30	2	19	8488.68		627.343	28.7352	1978-05-25	2183.19	0	0	0	0	30
1	1978-06-16	200	150	73	60	58	2810.53	30	3	22	8488.68		627.343	28.7352	1978-05-25	2183.19	0	0	0	0	30
1	1978-05-25	140	125	74	52	45	1899.19	0	2	0	5738.25		0	0	1978-05-25	1899.19	0	0	0	0	0
1	1978-05-29	260	130	74	54	48	2100.02	0	2	4	6344.38		200.839	10.575	1978-05-25	1899.19	0	0	0	0	0
1	1978-05-30	255	185	74	54	48	2100.02	0	2	5	6344.38		200.839	10.575	1978-05-25	1899.19	0	0	0	0	0
1	1978-06-01	265	190	74	54	48	2100.02	0	2	7	6344.38		200.839	10.575	1978-05-25	1899.19	0	0	0	0	0
1	1978-06-05	285	205	74	56	48	2183.19	0	2	11	6595.36		284	14.9538	1978-05-25	1899.19	0	0	0	0	0
1	1978-06-09	215	180	74	56	49	2225.37	0	2	15	6722.68		326.186	17.175	1978-05-25	1899.19	0	0	0	0	0
1	1978-06-13	215	155	74	56	49	2225.37	0	2	19	6722.68		326.186	17.175	1978-05-25	1899.19	0	0	0	0	0
1	1978-06-16	200	150	74	56	49	2225.37	21	2	22	6722.68		326.186	17.175	1978-05-25	1899.19	0	0	1	0	20
1	1978-06-20	240	180	74	56	49	2225.37	100	2	26	6722.68		326.186	17.175	1978-05-25	1899.19	0	0	5	0	95
1	1978-06-23	190	170	74	56	49	2225.37	100	2	29	6722.68		326.186	17.175	1978-05-25	1899.19	0	0	20	0	80
1	1978-06-27	190	150	74	56	49	2225.37	100	2	33	6722.68		326.186	17.175	1978-05-25	1899.19	0	0	60	0	40
1	1978-06-30	210	170	74	56	49	2225.37	100	3	36	6722.68		326.186	17.175	1978-05-25	1899.19	0	0	60	0	40
1	1978-05-25	140	125	75	58	50	2354.35	0	2	0	7111.94		0	0	1978-05-25	2354.35	0	0	0	0	0
1	1978-05-29	260	130	75	59	52	2486.97	0	2	4	7512.17		132.614	5.63272	1978-05-25	2354.35	0	0	0	0	0
1	1978-05-30	255	185	75	59	53	2531.98	0	2	5	7648.02		177.626	7.54458	1978-05-25	2354.35	0	0	0	0	0
1	1978-06-01	265	190	75	59	53	2531.98	0	2	7	7648.02		177.626	7.54458	1978-05-25	2354.35	0	0	0	0	0
1	1978-06-05	285	205	75	60	53	2577.39	30	2	11	7785.08		223.042	9.47359	1978-05-25	2354.35	0	0	0	0	30
1	1978-06-09	215	180	75	60	53	2577.39	100	2	15	7785.08		223.042	9.47359	1978-05-25	2354.35	0	0	30	0	70
1	1978-06-13	215	155	75	60	53	2577.39	100	2	19	7785.08		223.042	9.47359	1978-05-25	2354.35	0	0	50	0	50
1	1978-06-16	200	150	75	60	53	2577.39	100	3	22	7785.08		223.042	9.47359	1978-05-25	2354.35	0	0	50	0	50
1	1978-05-25	140	125	76	52	44	1860.23	0	2	0	5620.68		0	0	1978-05-25	1860.23	0	0	0	0	0
1	1978-05-29	260	130	76	53	45	1938.55	0	2	4	5857.04		78.3169	4.21007	1978-05-25	1860.23	0	0	0	0	0
1	1978-05-30	255	185	76	53	45	1938.55	0	2	5	5857.04		78.3169	4.21007	1978-05-25	1860.23	0	0	0	0	0
1	1978-06-01	265	190	76	53	46	1978.31	0	2	7	5977.05		118.081	6.34766	1978-05-25	1860.23	0	0	0	0	0
1	1978-06-05	285	205	76	54	48	2100.02	0	2	11	6344.38		239.795	12.8906	1978-05-25	1860.23	0	0	0	0	0
1	1978-06-09	215	180	76	54	48	2100.02	0	2	15	6344.38		239.795	12.8906	1978-05-25	1860.23	0	0	0	0	0
1	1978-06-13	215	155	76	54	48	2100.02	50	2	19	6344.38		239.795	12.8906	1978-05-25	1860.23	0	0	0	0	50
1	1978-06-16	200	150	76	54	48	2100.02	100	2	22	6344.38		239.795	12.8906	1978-05-25	1860.23	0	0	0	0	100
1	1978-06-20	240	180	76	54	48	2100.02	100	2	26	6344.38		239.795	12.8906	1978-05-25	1860.23	0	0	0	0	100
1	1978-06-23	190	170	76	54	48	2100.02	100	2	29	6344.38		239.795	12.8906	1978-05-25	1860.23	0	0	20	0	80
1	1978-06-27	190	150	76	54	48	2100.02	100	2	33	6344.38		239.795	12.8906	1978-05-25	1860.23	0	0	60	0	40
1	1978-06-30	210	170	76	54	48	2100.02	100	3	36	6344.38		239.795	12.8906	1978-05-25	1860.23	0	0	60	0	40
1	1978-05-25	140	125	77	45	44	1598.84	0	2	0	4831.79		0	0	1978-05-25	1598.84	0	0	0	0	0
1	1978-05-29	260	130	77	45	44	1598.84	0	2	4	4831.79		0	0	1978-05-25	1598.84	0	0	0	0	0
1	1978-05-30	255	185	77	45	44	1598.84	0	2	5	4831.79		0	0	1978-05-25	1598.84	0	0	0	0	0
1	1978-06-01	265	190	77	45	44	1598.84	50	2	7	4831.79		0	0	1978-05-25	1598.84	0	0	0	0	50
1	1978-06-05	285	205	77	45	44	1598.84	50	3	11	4831.79		0	0	1978-05-25	1598.84	0	0	0	0	50
1	1978-05-25	140	125	78	52	44	1860.23	0	2	0	5620.68		0	0	1978-05-25	1860.23	0	0	0	0	0
1	1978-05-29	260	130	78	52	44	1860.23	0	2	4	5620.68		0	0	1978-05-25	1860.23	0	0	0	0	0
1	1978-05-30	255	185	78	52	44	1860.23	0	2	5	5620.68		0	0	1978-05-25	1860.23	0	0	0	0	0
1	1978-06-01	265	190	78	52	44	1860.23	0	2	7	5620.68		0	0	1978-05-25	1860.23	0	0	0	0	0
1	1978-06-05	285	205	78	52	44	1860.23	0	2	11	5620.68		0	0	1978-05-25	1860.23	0	0	0	0	0
1	1978-06-09	215	180	78	53	44	1899.19	100	2	15	5738.25		38.9566	2.09418	1978-05-25	1860.23	0	0	0	0	100
1	1978-06-13	215	155	78	53	44	1899.19	100	2	19	5738.25		38.9566	2.09418	1978-05-25	1860.23	0	0	0	0	100
1	1978-06-16	200	150	78	53	44	1899.19	100	3	22	5738.25		38.9566	2.09418	1978-05-25	1860.23	0	0	0	0	100
1	1978-05-25	140	125	79	50	48	1938.55	0	2	0	5857.04		0	0	1978-05-25	1938.55	0	0	0	0	0
1	1978-05-29	260	130	79	50	48	1938.55	0	2	4	5857.04		0	0	1978-05-25	1938.55	0	0	0	0	0
1	1978-05-30	255	185	79	50	48	1938.55	0	2	5	5857.04		0	0	1978-05-25	1938.55	0	0	0	0	0
1	1978-06-01	265	190	79	50	48	1938.55	100	2	7	5857.04		0	0	1978-05-25	1938.55	0	0	0	0	100
1	1978-06-05	285	205	79	50	48	1938.55	100	3	11	5857.04		0	0	1978-05-25	1938.55	0	0	0	0	100
1	1978-05-25	140	125	80	42	38	1291.83	0	2	0	3905.24		0	0	1978-05-25	1291.83	0	0	0	0	0
1	1978-05-29	260	130	80	49	40	1598.84	0	2	4	4831.79		307.011	23.7656	1978-05-25	1291.83	0	0	0	0	0
1	1978-05-30	255	185	80	50	41	1671.5	0	2	5	5051.1		379.676	29.3906	1978-05-25	1291.83	0	0	0	0	0
1	1978-06-01	265	190	80	50	41	1671.5	0	2	7	5051.1		379.676	29.3906	1978-05-25	1291.83	0	0	0	0	0
1	1978-06-05	285	205	80	50	41	1671.5	0	2	11	5051.1		379.676	29.3906	1978-05-25	1291.83	0	0	0	0	0
1	1978-06-09	215	180	80	50	41	1671.5	0	2	15	5051.1		379.676	29.3906	1978-05-25	1291.83	0	0	0	0	0
1	1978-06-13	215	155	80	54	41	1821.68	0	2	19	5504.33		529.85	41.0156	1978-05-25	1291.83	0	0	0	0	0
1	1978-06-16	200	150	80	55	41	1860.23	30	2	22	5620.68		568.403	44	1978-05-25	1291.83	0	0	0	0	30
1	1978-06-20	240	180	80	55	41	1860.23	40	2	26	5620.68		568.403	44	1978-05-25	1291.83	0	0	0	0	40
1	1978-06-23	190	170	80	55	41	1860.23	100	2	29	5620.68		568.403	44	1978-05-25	1291.83	0	0	0	0	100
1	1978-06-27	190	150	80	55	41	1860.23	100	2	33	5620.68		568.403	44	1978-05-25	1291.83	0	0	0	0	100
1	1978-06-30	210	170	80	55	41	1860.23	100	2	36	5620.68		568.403	44	1978-05-25	1291.83	0	0	30	0	70
1	1978-07-04	230	225	80	55	41	1860.23	100	2	40	5620.68		568.403	44	1978-05-25	1291.83	0	0	70	0	30
1	1978-07-07	245	230	80	55	41	1860.23	100	3	43	5620.68		568.403	44	1978-05-25	1291.83	0	0	70	0	30
1	1978-05-25	140	125	81	54	46	2018.48	0	2	0	6098.27		0	0	1978-05-25	2018.48	0	0	0	0	0
1	1978-05-29	260	130	81	54	46	2018.48	0	2	4	6098.27		0	0	1978-05-25	2018.48	0	0	0	0	0
1	1978-05-30	255	185	81	54	46	2018.48	0	2	5	6098.27		0	0	1978-05-25	2018.48	0	0	0	0	0
1	1978-06-01	265	190	81	54	46	2018.48	0	2	7	6098.27		0	0	1978-05-25	2018.48	0	0	0	0	0
1	1978-06-05	285	205	81	54	47	2059.05	0	2	11	6220.72		40.5714	2.01	1978-05-25	2018.48	0	0	0	0	0
1	1978-06-09	215	180	81	54	47	2059.05	100	2	15	6220.72		40.5714	2.01	1978-05-25	2018.48	0	0	0	0	100
1	1978-06-13	215	155	81	54	47	2059.05	100	2	19	6220.72		40.5714	2.01	1978-05-25	2018.48	0	0	0	0	100
1	1978-06-16	200	150	81	54	47	2059.05	100	2	22	6220.72		40.5714	2.01	1978-05-25	2018.48	0	0	50	0	50
1	1978-06-20	240	180	81	54	47	2059.05	100	3	26	6220.72		40.5714	2.01	1978-05-25	2018.48	0	0	50	0	50
1	1978-05-25	140	125	82	58	53	2486.97	0	2	0	7512.17		0	0	1978-05-25	2486.97	0	0	0	0	0
1	1978-05-29	260	130	82	65	60	3153.87	0	2	4	9524.89		666.905	26.816	1978-05-25	2486.97	0	0	0	0	0
1	1978-05-30	255	185	82	69	62	3463.91	0	2	5	10460.6		976.943	39.2825	1978-05-25	2486.97	0	0	0	0	0
1	1978-06-01	265	190	82	71	68	3899.9	0	2	7	11776.4		1412.93	56.8136	1978-05-25	2486.97	0	0	0	0	0
1	1978-06-05	285	205	82	73	69	4070.06	0	2	11	12289.9		1583.09	63.6555	1978-05-25	2486.97	0	0	0	0	0
1	1978-06-09	215	180	82	75	72	4361.73	0	2	15	13170.2		1874.76	75.3835	1978-05-25	2486.97	0	0	0	0	0
1	1978-06-13	215	155	82	76	72	4421.27	0	2	19	13349.9		1934.31	77.7778	1978-05-25	2486.97	0	0	0	0	0
1	1978-06-16	200	150	82	77	72	4481.22	0	2	22	13530.8		1994.26	80.1883	1978-05-25	2486.97	0	0	0	0	0
1	1978-06-20	240	180	82	77	72	4481.22	0	2	26	13530.8		1994.26	80.1883	1978-05-25	2486.97	0	0	0	0	0
1	1978-06-23	190	170	82	77	72	4481.22	0	2	29	13530.8		1994.26	80.1883	1978-05-25	2486.97	0	0	0	0	0
1	1978-06-27	190	150	82	77	72	4481.22	20	2	33	13530.8		1994.26	80.1883	1978-05-25	2486.97	0	0	0	0	20
1	1978-06-30	210	170	82	77	72	4481.22	10	2	36	13530.8		1994.26	80.1883	1978-05-25	2486.97	0	0	0	0	10
1	1978-07-04	230	225	82	77	72	4481.22	46	2	40	13530.8		1994.26	80.1883	1978-05-25	2486.97	0	0	5	1	40
1	1978-07-07	245	230	82	77	73	4541.58	65	2	43	13713		2054.61	82.615	1978-05-25	2486.97	0	0	30	5	30
1	1978-07-11	190	150	82	77	73	4541.58	65	3	47	13713		2054.61	82.615	1978-05-25	2486.97	0	0	30	5	30
1	1978-05-25	140	125	83	51	43	1783.53	0	2	0	5389.19		0	0	1978-05-25	1783.53	0	0	0	0	0
1	1978-05-29	260	130	83	57	45	2100.02	0	2	4	6344.38		316.497	17.7456	1978-05-25	1783.53	0	0	0	0	0
1	1978-05-30	255	185	83	59	46	2225.37	0	2	5	6722.68		441.845	24.7737	1978-05-25	1783.53	0	0	0	0	0
1	1978-06-01	265	190	83	60	49	2398.15	0	2	7	7244.13		614.627	34.4613	1978-05-25	1783.53	0	0	0	0	0
1	1978-06-05	285	205	83	61	50	2486.97	0	2	11	7512.17		703.44	39.4409	1978-05-25	1783.53	0	0	0	0	0
1	1978-06-09	215	180	83	61	51	2531.98	100	2	15	7648.02		748.452	41.9647	1978-05-25	1783.53	0	0	0	0	100
1	1978-06-13	215	155	83	61	51	2531.98	100	2	19	7648.02		748.452	41.9647	1978-05-25	1783.53	0	0	0	0	100
1	1978-06-16	200	150	83	61	51	2531.98	100	2	22	7648.02		748.452	41.9647	1978-05-25	1783.53	0	0	0	0	100
1	1978-06-20	240	180	83	61	51	2531.98	100	2	26	7648.02		748.452	41.9647	1978-05-25	1783.53	0	0	0	0	100
1	1978-06-23	190	170	83	61	51	2531.98	100	2	29	7648.02		748.452	41.9647	1978-05-25	1783.53	0	0	5	0	95
1	1978-06-27	190	150	83	61	51	2531.98	100	2	33	7648.02		748.452	41.9647	1978-05-25	1783.53	0	0	60	0	40
1	1978-06-30	210	170	83	61	51	2531.98	100	3	36	7648.02		748.452	41.9647	1978-05-25	1783.53	0	0	60	0	40
1	1978-05-29	260	130	84	52	48	2018.48	0	1	0	6098.27		0	0	1978-05-29	2018.48	0	0	0	0	0
1	1978-05-30	255	185	84	56	50	2267.96	0	2	1	6851.21		249.484	12.36	1978-05-29	2018.48	0	0	0	0	0
1	1978-06-01	265	190	84	56	50	2267.96	0	2	3	6851.21		249.484	12.36	1978-05-29	2018.48	0	0	0	0	0
1	1978-06-05	285	205	84	56	51	2310.96	0	2	7	6980.97		292.477	14.49	1978-05-29	2018.48	0	0	0	0	0
1	1978-06-09	215	180	84	56	51	2310.96	0	2	11	6980.97		292.477	14.49	1978-05-29	2018.48	0	0	0	0	0
1	1978-06-13	215	155	84	56	51	2310.96	100	2	15	6980.97		292.477	14.49	1978-05-29	2018.48	0	0	40	0	60
1	1978-06-16	200	150	84	57	52	2398.15	100	2	18	7244.13		379.676	18.81	1978-05-29	2018.48	0	0	90	0	10
1	1978-06-20	240	180	84	57	52	2398.15	100	3	22	7244.13		379.676	18.81	1978-05-29	2018.48	0	0	90	0	10
1	1978-05-29	260	130	85	47	44	1671.5	0	1	0	5051.1		0	0	1978-05-29	1671.5	0	0	0	0	0
1	1978-05-30	255	185	85	53	50	2141.4	0	2	1	6469.26		469.902	28.1125	1978-05-29	1671.5	0	0	0	0	0
1	1978-06-01	265	190	85	53	51	2183.19	0	2	3	6595.36		511.684	30.6122	1978-05-29	1671.5	0	0	0	0	0
1	1978-06-05	285	205	85	55	52	2310.96	0	2	7	6980.97		639.454	38.2562	1978-05-29	1671.5	0	0	0	0	0
1	1978-06-09	215	180	85	57	55	2531.98	0	2	11	7648.02		860.477	51.4793	1978-05-29	1671.5	0	0	0	0	0
1	1978-06-13	215	155	85	57	55	2531.98	0	2	15	7648.02		860.477	51.4793	1978-05-29	1671.5	0	0	0	0	0
1	1978-06-16	200	150	85	57	55	2531.98	0	2	18	7648.02		860.477	51.4793	1978-05-29	1671.5	0	0	0	0	0
1	1978-06-20	240	180	85	57	55	2531.98	30	2	22	7648.02		860.477	51.4793	1978-05-29	1671.5	0	0	0	0	30
1	1978-06-23	190	170	85	57	55	2531.98	90	2	25	7648.02		860.477	51.4793	1978-05-29	1671.5	0	0	0	0	90
1	1978-06-27	190	150	85	57	55	2531.98	100	2	29	7648.02		860.477	51.4793	1978-05-29	1671.5	0	0	30	0	70
1	1978-06-30	210	170	85	57	55	2531.98	100	3	32	7648.02		860.477	51.4793	1978-05-29	1671.5	0	0	30	0	70
1	1978-05-29	260	130	86	51	48	1978.31	0	1	0	5977.05		0	0	1978-05-29	1978.31	0	0	0	0	0
1	1978-05-30	255	185	86	56	51	2310.96	0	2	1	6980.97		332.645	16.8146	1978-05-29	1978.31	0	0	0	0	0
1	1978-06-01	265	190	86	57	52	2398.15	0	2	3	7244.13		419.843	21.2223	1978-05-29	1978.31	0	0	0	0	0
1	1978-06-05	285	205	86	57	52	2398.15	0	2	7	7244.13		419.843	21.2223	1978-05-29	1978.31	0	0	0	0	0
1	1978-06-09	215	180	86	57	53	2442.36	0	2	11	7377.54		464.048	23.4568	1978-05-29	1978.31	0	0	0	0	0
1	1978-06-13	215	155	86	57	53	2442.36	0	2	15	7377.54		464.048	23.4568	1978-05-29	1978.31	0	0	0	0	0
1	1978-06-16	200	150	86	58	54	2531.98	0	2	18	7648.02		553.669	27.9869	1978-05-29	1978.31	0	0	0	0	0
1	1978-06-20	240	180	86	58	55	2577.39	100	2	22	7785.08		599.084	30.2826	1978-05-29	1978.31	0	0	0	0	100
1	1978-06-23	190	170	86	58	55	2577.39	100	2	25	7785.08		599.084	30.2826	1978-05-29	1978.31	0	0	0	0	100
1	1978-06-27	190	150	86	59	55	2623.21	100	2	29	7923.37		644.904	32.5987	1978-05-29	1978.31	0	0	0	0	100
1	1978-06-30	210	170	86	59	56	2669.44	100	2	32	8062.87		691.127	34.9352	1978-05-29	1978.31	0	0	0	0	100
1	1978-07-04	230	225	86	59	56	2669.44	100	2	36	8062.87		691.127	34.9352	1978-05-29	1978.31	0	0	50	0	50
1	1978-07-07	245	230	86	59	56	2669.44	100	3	39	8062.87		691.127	34.9352	1978-05-29	1978.31	0	0	50	0	50
1	1978-05-29	260	130	87	52	46	1938.55	0	1	0	5857.04		0	0	1978-05-29	1938.55	0	0	0	0	0
1	1978-05-30	255	185	87	59	50	2398.15	0	2	1	7244.13		459.607	23.7089	1978-05-29	1938.55	0	0	0	0	0
1	1978-06-01	265	190	87	60	54	2623.21	0	2	3	7923.37		684.668	35.3186	1978-05-29	1938.55	0	0	0	0	0
1	1978-06-05	285	205	87	63	55	2810.53	0	2	7	8488.68		871.982	44.9813	1978-05-29	1938.55	0	0	0	0	0
1	1978-06-09	215	180	87	65	58	3053.76	0	2	11	9222.74		1115.21	57.5281	1978-05-29	1938.55	0	0	0	0	0
1	1978-06-13	215	155	87	65	58	3053.76	0	2	15	9222.74		1115.21	57.5281	1978-05-29	1938.55	0	0	0	0	0
1	1978-06-16	200	150	87	65	58	3053.76	0	2	18	9222.74		1115.21	57.5281	1978-05-29	1938.55	0	0	0	0	0
1	1978-06-20	240	180	87	65	58	3053.76	20	2	22	9222.74		1115.21	57.5281	1978-05-29	1938.55	0	0	0	0	20
1	1978-06-23	190	170	87	65	58	3053.76	70	2	25	9222.74		1115.21	57.5281	1978-05-29	1938.55	0	0	20	0	50
1	1978-06-27	190	150	87	65	58	3053.76	100	2	29	9222.74		1115.21	57.5281	1978-05-29	1938.55	0	0	50	0	50
1	1978-06-30	210	170	87	65	58	3053.76	100	3	32	9222.74		1115.21	57.5281	1978-05-29	1938.55	0	0	50	0	50
1	1978-05-29	260	130	88	56	51	2310.96	0	1	0	6980.97		0	0	1978-05-29	2310.96	0	0	0	0	0
1	1978-05-30	255	185	88	58	53	2486.97	0	2	1	7512.17		176.011	7.61639	1978-05-29	2310.96	0	0	0	0	0
1	1978-06-01	265	190	88	60	56	2716.06	0	2	3	8203.59		405.109	17.5299	1978-05-29	2310.96	0	0	0	0	0
1	1978-06-05	285	205	88	61	56	2763.09	0	2	7	8345.53		452.139	19.565	1978-05-29	2310.96	0	0	0	0	0
1	1978-06-09	215	180	88	63	57	2906.61	0	2	11	8778.65		595.653	25.7752	1978-05-29	2310.96	0	0	0	0	0
1	1978-06-13	215	155	88	63	57	2906.61	0	2	15	8778.65		595.653	25.7752	1978-05-29	2310.96	0	0	0	0	0
1	1978-06-16	200	150	88	64	58	3004.3	0	2	18	9073.49		693.347	30.0026	1978-05-29	2310.96	0	0	0	0	0
1	1978-06-20	240	180	88	64	58	3004.3	21	2	22	9073.49		693.347	30.0026	1978-05-29	2310.96	0	0	0	1	20
1	1978-06-23	190	170	88	65	58	3053.76	35	2	25	9222.74		742.8	32.1425	1978-05-29	2310.96	0	0	0	5	30
1	1978-06-27	190	150	88	65	58	3053.76	90	2	29	9222.74		742.8	32.1425	1978-05-29	2310.96	0	0	20	10	60
1	1978-06-30	210	170	88	65	58	3053.76	90	3	32	9222.74		742.8	32.1425	1978-05-29	2310.96	0	0	20	10	60
1	1978-05-29	260	130	89	46	46	1708.44	0	1	0	5162.58		0	0	1978-05-29	1708.44	0	0	0	0	0
1	1978-05-30	255	185	89	47	46	1745.78	0	2	1	5275.27		37.3418	2.18573	1978-05-29	1708.44	0	0	0	0	0
1	1978-06-01	265	190	89	48	45	1745.78	0	2	3	5275.27		37.3418	2.18573	1978-05-29	1708.44	0	0	0	0	0
1	1978-06-05	285	205	89	48	46	1783.53	0	2	7	5389.19		75.0874	4.39509	1978-05-29	1708.44	0	0	0	0	0
1	1978-06-09	215	180	89	51	47	1938.55	0	2	11	5857.04		230.106	13.4688	1978-05-29	1708.44	0	0	0	0	0
1	1978-06-13	215	155	89	51	47	1938.55	0	2	15	5857.04		230.106	13.4688	1978-05-29	1708.44	0	0	0	0	0
1	1978-06-16	200	150	89	51	47	1938.55	0	2	18	5857.04		230.106	13.4688	1978-05-29	1708.44	0	0	0	0	0
1	1978-06-20	240	180	89	51	47	1938.55	30	2	22	5857.04		230.106	13.4688	1978-05-29	1708.44	0	0	0	0	30
1	1978-06-23	190	170	89	51	47	1938.55	32	2	25	5857.04		230.106	13.4688	1978-05-29	1708.44	0	0	0	2	30
1	1978-06-27	190	150	89	51	47	1938.55	45	2	29	5857.04		230.106	13.4688	1978-05-29	1708.44	0	0	0	5	40
1	1978-06-30	210	170	89	52	47	1978.31	100	2	32	5977.05		269.871	15.7963	1978-05-29	1708.44	0	0	0	20	80
1	1978-07-04	230	225	89	52	47	1978.31	100	2	36	5977.05		269.871	15.7963	1978-05-29	1708.44	0	0	40	30	30
1	1978-07-07	245	230	89	52	47	1978.31	100	3	39	5977.05		269.871	15.7963	1978-05-29	1708.44	0	0	40	30	30
1	1978-05-29	260	130	90	52	43	1821.68	0	1	0	5504.33		0	0	1978-05-29	1821.68	0	0	0	0	0
1	1978-05-30	255	185	90	55	47	2100.02	0	2	1	6344.38		278.348	15.2798	1978-05-29	1821.68	0	0	0	0	0
1	1978-06-01	265	190	90	54	49	2141.4	0	2	3	6469.26		319.727	17.5512	1978-05-29	1821.68	0	0	0	0	0
1	1978-06-05	285	205	90	57	50	2310.96	0	2	7	6980.97		489.279	26.8587	1978-05-29	1821.68	0	0	0	0	0
1	1978-06-09	215	180	90	57	51	2354.35	0	2	11	7111.94		532.676	29.241	1978-05-29	1821.68	0	0	0	0	0
1	1978-06-13	215	155	90	57	51	2354.35	0	2	15	7111.94		532.676	29.241	1978-05-29	1821.68	0	0	0	0	0
1	1978-06-16	200	150	90	57	51	2354.35	20	2	18	7111.94		532.676	29.241	1978-05-29	1821.68	0	0	0	0	20
1	1978-06-20	240	180	90	57	51	2354.35	40	2	22	7111.94		532.676	29.241	1978-05-29	1821.68	0	0	0	0	40
1	1978-06-23	190	170	90	57	51	2354.35	80	2	25	7111.94		532.676	29.241	1978-05-29	1821.68	0	0	20	0	60
1	1978-06-27	190	150	90	57	51	2354.35	100	2	29	7111.94		532.676	29.241	1978-05-29	1821.68	0	0	60	0	40
1	1978-06-30	210	170	90	57	51	2354.35	100	3	32	7111.94		532.676	29.241	1978-05-29	1821.68	0	0	60	0	40
1	1978-05-29	260	130	91	32	25	655.804	0	1	0	1985.72		0	0	1978-05-29	655.804	0	0	0	0	0
1	1978-05-30	255	185	91	32	25	655.804	0	2	1	1985.72		0	0	1978-05-29	655.804	0	0	0	0	0
1	1978-06-01	265	190	91	32	25	655.804	100	2	3	1985.72		0	0	1978-05-29	655.804	0	0	0	0	100
1	1978-06-05	285	205	91	32	26	679.016	100	2	7	2055.78		23.2125	3.53955	1978-05-29	655.804	0	0	0	0	100
1	1978-06-09	215	180	91	32	26	679.016	100	3	11	2055.78		23.2125	3.53955	1978-05-29	655.804	0	0	0	0	100
1	1978-05-29	260	130	92	62	57	2858.37	0	1	0	8633.06		0	0	1978-05-29	2858.37	0	0	0	0	0
1	1978-05-30	255	185	92	71	60	3463.91	0	2	1	10460.6		605.543	21.1849	1978-05-29	2858.37	0	0	0	0	0
1	1978-06-01	265	190	92	75	64	3899.9	0	2	3	11776.4		1041.53	36.4381	1978-05-29	2858.37	0	0	0	0	0
1	1978-06-05	285	205	92	77	68	4243.85	0	2	7	12814.4		1385.48	48.4712	1978-05-29	2858.37	0	0	0	0	0
1	1978-06-09	215	180	92	77	69	4302.59	0	2	11	12991.7		1444.22	50.5261	1978-05-29	2858.37	0	0	0	0	0
1	1978-06-13	215	155	92	77	69	4302.59	0	2	15	12991.7		1444.22	50.5261	1978-05-29	2858.37	0	0	0	0	0
1	1978-06-16	200	150	92	78	70	4421.27	10	2	18	13349.9		1562.91	54.6783	1978-05-29	2858.37	0	0	0	0	10
1	1978-06-20	240	180	92	78	71	4481.22	20	2	22	13530.8		1622.86	56.7757	1978-05-29	2858.37	0	0	0	0	20
1	1978-06-23	190	170	92	78	71	4481.22	50	2	25	13530.8		1622.86	56.7757	1978-05-29	2858.37	0	0	0	0	50
1	1978-06-27	190	150	92	78	71	4481.22	100	2	29	13530.8		1622.86	56.7757	1978-05-29	2858.37	0	0	20	0	80
1	1978-06-30	210	170	92	78	71	4481.22	100	2	32	13530.8		1622.86	56.7757	1978-05-29	2858.37	0	0	70	0	30
1	1978-07-04	230	225	92	78	71	4481.22	100	3	36	13530.8		1622.86	56.7757	1978-05-29	2858.37	0	0	70	0	30
1	1978-05-29	260	130	93	52	45	1899.19	0	1	0	5738.25		0	0	1978-05-29	1899.19	0	0	0	0	0
1	1978-05-30	255	185	93	52	45	1899.19	0	2	1	5738.25		0	0	1978-05-29	1899.19	0	0	0	0	0
1	1978-06-01	265	190	93	52	46	1938.55	0	2	3	5857.04		39.3603	2.07248	1978-05-29	1899.19	0	0	0	0	0
1	1978-06-05	285	205	93	57	50	2310.96	0	2	7	6980.97		411.77	21.6814	1978-05-29	1899.19	0	0	0	0	0
1	1978-06-09	215	180	93	57	51	2354.35	0	2	11	7111.94		455.167	23.9664	1978-05-29	1899.19	0	0	0	0	0
1	1978-06-13	215	155	93	57	51	2354.35	0	2	15	7111.94		455.167	23.9664	1978-05-29	1899.19	0	0	0	0	0
1	1978-06-16	200	150	93	58	52	2442.36	0	2	18	7377.54		543.172	28.6003	1978-05-29	1899.19	0	0	0	0	0
1	1978-06-20	240	180	93	58	52	2442.36	0	2	22	7377.54		543.172	28.6003	1978-05-29	1899.19	0	0	0	0	0
1	1978-06-23	190	170	93	58	52	2442.36	0	2	25	7377.54		543.172	28.6003	1978-05-29	1899.19	0	0	0	0	0
1	1978-06-27	190	150	93	58	52	2442.36	10	2	29	7377.54		543.172	28.6003	1978-05-29	1899.19	0	0	0	0	10
1	1978-06-30	210	170	93	58	52	2442.36	10	2	32	7377.54		543.172	28.6003	1978-05-29	1899.19	0	0	5	0	5
1	1978-07-04	230	225	93	59	53	2531.98	50	2	36	7648.02		632.793	33.3192	1978-05-29	1899.19	0	0	10	0	40
1	1978-07-07	245	230	93	59	53	2531.98	100	2	39	7648.02		632.793	33.3192	1978-05-29	1899.19	0	10	40	0	50
1	1978-07-11	190	150	93	59	53	2531.98	100	3	43	7648.02		632.793	33.3192	1978-05-29	1899.19	0	10	40	0	50
1	1978-05-29	260	130	94	39	35	1105.32	0	1	0	3342.36		0	0	1978-05-29	1105.32	0	0	0	0	0
1	1978-05-30	255	185	94	41	36	1196.76	0	2	1	3618.31		91.4371	8.27246	1978-05-29	1105.32	0	0	0	0	0
1	1978-06-01	265	190	94	42	37	1259.73	0	2	3	3808.38		154.414	13.9701	1978-05-29	1105.32	0	0	0	0	0
1	1978-06-05	285	205	94	43	39	1357.22	0	2	7	4102.61		251.906	22.7904	1978-05-29	1105.32	0	0	0	0	0
1	1978-06-09	215	180	94	43	40	1390.53	0	2	11	4203.12		285.211	25.8035	1978-05-29	1105.32	0	0	0	0	0
1	1978-06-13	215	155	94	43	40	1390.53	0	2	15	4203.12		285.211	25.8035	1978-05-29	1105.32	0	0	0	0	0
1	1978-06-16	200	150	94	46	41	1527.79	0	2	18	4617.36		422.467	38.2213	1978-05-29	1105.32	0	0	0	0	0
1	1978-06-20	240	180	94	46	41	1527.79	40	2	22	4617.36		422.467	38.2213	1978-05-29	1105.32	0	0	0	0	40
1	1978-06-23	190	170	94	46	41	1527.79	100	2	25	4617.36		422.467	38.2213	1978-05-29	1105.32	0	0	0	0	100
1	1978-06-27	190	150	94	46	41	1527.79	70	2	29	4617.36		422.467	38.2213	1978-05-29	1105.32	0	0	20	0	50
1	1978-06-30	210	170	94	46	41	1527.79	70	3	32	4617.36		422.467	38.2213	1978-05-29	1105.32	0	0	20	0	50
1	1978-05-30	255	185	95	72	68	3956.22	0	1	0	11946.4		0	0	1978-05-30	3956.22	0	0	0	0	0
1	1978-06-01	265	190	95	76	70	4302.59	0	2	2	12991.7		346.371	8.7551	1978-05-30	3956.22	0	0	0	0	0
1	1978-06-05	285	205	95	80	71	4602.33	0	2	6	13896.3		646.115	16.3316	1978-05-30	3956.22	0	0	0	0	0
1	1978-06-09	215	180	95	80	75	4849.39	0	2	10	14642		893.177	22.5765	1978-05-30	3956.22	0	0	0	0	0
1	1978-06-13	215	155	95	80	75	4849.39	0	2	14	14642		893.177	22.5765	1978-05-30	3956.22	0	0	0	0	0
1	1978-06-16	200	150	95	80	75	4849.39	0	2	17	14642		893.177	22.5765	1978-05-30	3956.22	0	0	0	0	0
1	1978-06-20	240	180	95	80	75	4849.39	100	2	21	14642		893.177	22.5765	1978-05-30	3956.22	0	0	0	1	99
1	1978-06-23	190	170	95	80	76	4912.17	100	2	24	14831.4		955.951	24.1633	1978-05-30	3956.22	0	0	0	5	95
1	1978-06-27	190	150	95	81	76	4975.35	100	2	28	15022.1		1019.13	25.7602	1978-05-30	3956.22	0	0	0	15	85
1	1978-06-30	210	170	95	81	77	5038.93	100	2	31	15214		1082.71	27.3673	1978-05-30	3956.22	0	0	0	20	80
1	1978-07-04	230	225	95	81	77	5038.93	100	2	35	15214		1082.71	27.3673	1978-05-30	3956.22	0	0	30	20	50
1	1978-07-07	245	230	95	81	77	5038.93	100	3	38	15214		1082.71	27.3673	1978-05-30	3956.22	0	0	30	20	50
1	1978-05-30	255	185	96	46	43	1598.84	0	1	0	4831.79		0	0	1978-05-30	1598.84	0	0	0	0	0
1	1978-06-01	265	190	96	51	46	1899.19	0	2	2	5738.25		300.35	18.7855	1978-05-30	1598.84	0	0	0	0	0
1	1978-06-05	285	205	96	52	46	1938.55	0	2	6	5857.04		339.71	21.2473	1978-05-30	1598.84	0	0	0	0	0
1	1978-06-09	215	180	96	52	46	1938.55	0	2	10	5857.04		339.71	21.2473	1978-05-30	1598.84	0	0	0	0	0
1	1978-06-13	215	155	96	52	46	1938.55	0	2	14	5857.04		339.71	21.2473	1978-05-30	1598.84	0	0	0	0	0
1	1978-06-16	200	150	96	52	47	1978.31	20	2	17	5977.05		379.474	23.7344	1978-05-30	1598.84	0	0	0	0	20
1	1978-06-20	240	180	96	52	47	1978.31	35	2	21	5977.05		379.474	23.7344	1978-05-30	1598.84	0	0	5	0	30
1	1978-06-23	190	170	96	52	47	1978.31	35	3	24	5977.05		379.474	23.7344	1978-05-30	1598.84	0	0	5	0	30
1	1978-05-30	255	185	97	45	39	1424.24	0	1	0	4304.86		0	0	1978-05-30	1424.24	0	0	0	0	0
1	1978-06-01	265	190	97	45	39	1424.24	0	2	2	4304.86		0	0	1978-05-30	1424.24	0	0	0	0	0
1	1978-06-05	285	205	97	45	39	1424.24	0	2	6	4304.86		0	0	1978-05-30	1424.24	0	0	0	0	0
1	1978-06-09	215	180	97	45	40	1458.35	15	2	10	4407.81		34.1123	2.39512	1978-05-30	1424.24	0	0	0	0	15
1	1978-06-13	215	155	97	45	40	1458.35	100	2	14	4407.81		34.1123	2.39512	1978-05-30	1424.24	0	0	0	0	100
1	1978-06-16	200	150	97	45	40	1458.35	100	3	17	4407.81		34.1123	2.39512	1978-05-30	1424.24	0	0	0	0	100
1	1978-05-30	255	185	98	40	34	1105.32	0	1	0	3342.36		0	0	1978-05-30	1105.32	0	0	0	0	0
1	1978-06-01	265	190	98	40	34	1105.32	0	2	2	3342.36		0	0	1978-05-30	1105.32	0	0	0	0	0
1	1978-06-05	285	205	98	41	36	1196.76	0	2	6	3618.31		91.4371	8.27246	1978-05-30	1105.32	0	0	0	0	0
1	1978-06-09	215	180	98	43	36	1259.73	0	2	10	3808.38		154.414	13.9701	1978-05-30	1105.32	0	0	0	0	0
1	1978-06-13	215	155	98	43	36	1259.73	0	2	14	3808.38		154.414	13.9701	1978-05-30	1105.32	0	0	0	0	0
1	1978-06-16	200	150	98	43	37	1291.83	0	2	17	3905.24		186.507	16.8736	1978-05-30	1105.32	0	0	0	0	0
1	1978-06-20	240	180	98	43	37	1291.83	50	2	21	3905.24		186.507	16.8736	1978-05-30	1105.32	0	0	0	0	50
1	1978-06-23	190	170	98	43	37	1291.83	80	2	24	3905.24		186.507	16.8736	1978-05-30	1105.32	0	0	0	0	80
1	1978-06-27	190	150	98	43	37	1291.83	100	2	28	3905.24		186.507	16.8736	1978-05-30	1105.32	0	0	20	0	80
1	1978-06-30	210	170	98	43	37	1291.83	100	3	31	3905.24		186.507	16.8736	1978-05-30	1105.32	0	0	20	0	80
1	1978-05-30	255	185	99	54	50	2183.19	0	1	0	6595.36		0	0	1978-05-30	2183.19	0	0	0	0	0
1	1978-06-01	265	190	99	55	52	2310.96	0	2	2	6980.97		127.77	5.85244	1978-05-30	2183.19	0	0	0	0	0
1	1978-06-05	285	205	99	54	51	2225.37	40	2	6	6722.68		42.1862	1.93232	1978-05-30	2183.19	0	0	0	0	40
1	1978-06-09	215	180	99	54	52	2267.96	70	2	10	6851.21		84.7761	3.88314	1978-05-30	2183.19	0	0	20	0	50
1	1978-06-13	215	155	99	54	52	2267.96	70	3	14	6851.21		84.7761	3.88314	1978-05-30	2183.19	0	0	20	0	50
1	1978-05-30	255	185	100	53	43	1860.23	0	1	0	5620.68		0	0	1978-05-30	1860.23	0	0	0	0	0
1	1978-06-01	265	190	100	64	62	3204.54	0	2	2	9677.79		1344.31	72.2656	1978-05-30	1860.23	0	0	0	0	0
1	1978-06-05	285	205	100	73	68	4012.94	0	2	6	12117.5		2152.71	115.723	1978-05-30	1860.23	0	0	0	0	0
1	1978-06-09	215	180	100	78	59	3788.48	0	2	10	11440.1		1928.25	103.657	1978-05-30	1860.23	0	0	0	0	0
1	1978-06-13	215	155	100	78	69	4361.73	0	2	14	13170.2		2501.5	134.473	1978-05-30	1860.23	0	0	0	0	0
1	1978-06-16	200	150	100	79	72	4602.33	0	2	17	13896.3		2742.1	147.407	1978-05-30	1860.23	0	0	0	0	0
1	1978-06-20	240	180	100	79	72	4602.33	0	2	21	13896.3		2742.1	147.407	1978-05-30	1860.23	0	0	0	0	0
1	1978-06-23	190	170	100	80	72	4663.49	0	2	24	14080.9		2803.26	150.694	1978-05-30	1860.23	0	0	0	0	0
1	1978-06-27	190	150	100	80	73	4725.06	0	2	28	14266.7		2864.83	154.004	1978-05-30	1860.23	0	0	0	0	0
1	1978-06-30	210	170	100	80	73	4725.06	0	2	31	14266.7		2864.83	154.004	1978-05-30	1860.23	0	0	0	0	0
1	1978-07-04	230	225	100	80	73	4725.06	21	2	35	14266.7		2864.83	154.004	1978-05-30	1860.23	0	0	0	1	20
1	1978-07-07	245	230	100	80	73	4725.06	85	2	38	14266.7		2864.83	154.004	1978-05-30	1860.23	0	0	10	15	60
1	1978-07-11	190	150	100	80	73	4725.06	85	3	42	14266.7		2864.83	154.004	1978-05-30	1860.23	0	0	10	15	60
1	1978-05-30	255	185	101	49	41	1634.97	0	1	0	4940.84		0	0	1978-05-30	1634.97	0	0	0	0	0
1	1978-06-01	265	190	101	50	43	1745.78	0	2	2	5275.27		110.814	6.77778	1978-05-30	1634.97	0	0	0	0	0
1	1978-06-05	285	205	101	53	45	1938.55	0	2	6	5857.04		303.579	18.5679	1978-05-30	1634.97	0	0	0	0	0
1	1978-06-09	215	180	101	53	45	1938.55	0	2	10	5857.04		303.579	18.5679	1978-05-30	1634.97	0	0	0	0	0
1	1978-06-13	215	155	101	54	45	1978.31	0	2	14	5977.05		343.343	21	1978-05-30	1634.97	0	0	0	0	0
1	1978-06-16	200	150	101	54	45	1978.31	0	2	17	5977.05		343.343	21	1978-05-30	1634.97	0	0	0	0	0
1	1978-06-20	240	180	101	54	45	1978.31	100	2	21	5977.05		343.343	21	1978-05-30	1634.97	0	0	0	0	100
1	1978-06-23	190	170	101	54	45	1978.31	100	3	24	5977.05		343.343	21	1978-05-30	1634.97	0	0	0	0	100
1	1978-05-30	255	185	102	49	42	1671.5	0	1	0	5051.1		0	0	1978-05-30	1671.5	0	0	0	0	0
1	1978-06-01	265	190	102	53	46	1978.31	0	2	2	5977.05		306.809	18.3553	1978-05-30	1671.5	0	0	0	0	0
1	1978-06-05	285	205	102	55	47	2100.02	0	2	6	6344.38		428.523	25.637	1978-05-30	1671.5	0	0	0	0	0
1	1978-06-09	215	180	102	55	48	2141.4	0	2	10	6469.26		469.902	28.1125	1978-05-30	1671.5	0	0	0	0	0
1	1978-06-13	215	155	102	58	50	2354.35	0	2	14	7111.94		682.851	40.8526	1978-05-30	1671.5	0	0	0	0	0
1	1978-06-16	200	150	102	58	50	2354.35	30	2	17	7111.94		682.851	40.8526	1978-05-30	1671.5	0	0	0	0	30
1	1978-06-20	240	180	102	58	50	2354.35	20	2	21	7111.94		682.851	40.8526	1978-05-30	1671.5	0	0	0	0	20
1	1978-06-23	190	170	102	58	50	2354.35	100	2	24	7111.94		682.851	40.8526	1978-05-30	1671.5	0	0	20	0	80
1	1978-06-27	190	150	102	58	50	2354.35	100	2	28	7111.94		682.851	40.8526	1978-05-30	1671.5	0	0	40	0	60
1	1978-06-30	210	170	102	58	50	2354.35	100	3	31	7111.94		682.851	40.8526	1978-05-30	1671.5	0	0	40	0	60
1	1978-05-30	255	185	103	46	36	1357.22	0	1	0	4102.61		0	0	1978-05-30	1357.22	0	0	0	0	0
1	1978-06-01	265	190	103	53	43	1860.23	0	2	2	5620.68		503.005	37.0613	1978-05-30	1357.22	0	0	0	0	0
1	1978-06-05	285	205	103	56	48	2183.19	0	2	6	6595.36		825.961	60.8566	1978-05-30	1357.22	0	0	0	0	0
1	1978-06-09	215	180	103	57	48	2225.37	0	2	10	6722.68		868.147	63.9649	1978-05-30	1357.22	0	0	0	0	0
1	1978-06-13	215	155	103	58	48	2267.96	0	2	14	6851.21		910.737	67.1029	1978-05-30	1357.22	0	0	0	0	0
1	1978-06-16	200	150	103	59	49	2354.35	100	2	17	7111.94		997.128	73.4682	1978-05-30	1357.22	0	0	0	0	100
1	1978-06-20	240	180	103	59	49	2354.35	100	2	21	7111.94		997.128	73.4682	1978-05-30	1357.22	0	0	15	0	85
1	1978-06-23	190	170	103	59	49	2354.35	100	3	24	7111.94		997.128	73.4682	1978-05-30	1357.22	0	0	15	0	85
1	1978-05-30	255	185	104	56	51	2310.96	0	1	0	6980.97		0	0	1978-05-30	2310.96	0	0	0	0	0
1	1978-06-01	265	190	104	61	55	2716.06	0	2	2	8203.59		405.109	17.5299	1978-05-30	2310.96	0	0	0	0	0
1	1978-06-05	285	205	104	64	58	3004.3	0	2	6	9073.49		693.347	30.0026	1978-05-30	2310.96	0	0	0	0	0
1	1978-06-09	215	180	104	64	59	3053.76	0	2	10	9222.74		742.8	32.1425	1978-05-30	2310.96	0	0	0	0	0
1	1978-06-13	215	155	104	64	59	3053.76	0	2	14	9222.74		742.8	32.1425	1978-05-30	2310.96	0	0	0	0	0
1	1978-06-16	200	150	104	64	59	3053.76	20	2	17	9222.74		742.8	32.1425	1978-05-30	2310.96	0	0	0	0	20
1	1978-06-20	240	180	104	64	59	3053.76	25	2	21	9222.74		742.8	32.1425	1978-05-30	2310.96	0	0	0	0	25
1	1978-06-23	190	170	104	64	59	3053.76	60	2	24	9222.74		742.8	32.1425	1978-05-30	2310.96	0	0	0	0	60
1	1978-06-27	190	150	104	64	59	3053.76	100	2	28	9222.74		742.8	32.1425	1978-05-30	2310.96	0	0	60	0	40
1	1978-06-30	210	170	104	64	59	3053.76	100	3	31	9222.74		742.8	32.1425	1978-05-30	2310.96	0	0	60	0	40
1	1978-06-01	265	190	105	54	48	2100.02	0	1	0	6344.38		0	0	1978-06-01	2100.02	0	0	0	0	0
1	1978-06-05	285	205	105	61	55	2716.06	0	2	4	8203.59		616.039	29.3349	1978-06-01	2100.02	0	0	0	0	0
1	1978-06-09	215	180	105	62	55	2763.09	0	2	8	8345.53		663.07	31.5744	1978-06-01	2100.02	0	0	0	0	0
1	1978-06-13	215	155	105	63	56	2858.37	0	2	12	8633.06		758.342	36.1111	1978-06-01	2100.02	0	0	0	0	0
1	1978-06-16	200	150	105	64	57	2955.25	0	2	15	8925.46		855.229	40.7247	1978-06-01	2100.02	0	0	0	0	0
1	1978-06-20	240	180	105	64	57	2955.25	0	2	19	8925.46		855.229	40.7247	1978-06-01	2100.02	0	0	0	0	0
1	1978-06-23	190	170	105	64	57	2955.25	0	2	22	8925.46		855.229	40.7247	1978-06-01	2100.02	0	0	0	0	0
1	1978-06-27	190	150	105	64	58	3004.3	0	2	26	9073.49		904.278	43.0604	1978-06-01	2100.02	0	0	0	0	0
1	1978-06-30	210	170	105	64	58	3004.3	5	2	29	9073.49		904.278	43.0604	1978-06-01	2100.02	0	0	0	5	0
1	1978-07-04	230	225	105	65	58	3053.76	40	2	33	9222.74		953.731	45.4152	1978-06-01	2100.02	0	0	0	15	25
1	1978-07-07	245	230	105	65	58	3053.76	40	3	36	9222.74		953.731	45.4152	1978-06-01	2100.02	0	0	0	15	25
1	1978-06-01	265	190	106	59	53	2531.98	0	1	0	7648.02		0	0	1978-06-01	2531.98	0	0	0	0	0
1	1978-06-05	285	205	106	61	58	2858.37	0	2	4	8633.06		326.388	12.8906	1978-06-01	2531.98	0	0	0	0	0
1	1978-06-09	215	180	106	61	59	2906.61	0	2	8	8778.65		374.63	14.7959	1978-06-01	2531.98	0	0	0	0	0
1	1978-06-13	215	155	106	61	59	2906.61	0	2	12	8778.65		374.63	14.7959	1978-06-01	2531.98	0	0	0	0	0
1	1978-06-16	200	150	106	63	59	3004.3	0	2	15	9073.49		472.324	18.6543	1978-06-01	2531.98	0	0	0	0	0
1	1978-06-20	240	180	106	63	59	3004.3	0	2	19	9073.49		472.324	18.6543	1978-06-01	2531.98	0	0	0	0	0
1	1978-06-23	190	170	106	63	59	3004.3	17	2	22	9073.49		472.324	18.6543	1978-06-01	2531.98	0	0	0	2	15
1	1978-06-27	190	150	106	63	59	3004.3	30	2	26	9073.49		472.324	18.6543	1978-06-01	2531.98	0	0	0	10	20
1	1978-06-30	210	170	106	63	59	3004.3	75	2	29	9073.49		472.324	18.6543	1978-06-01	2531.98	0	0	0	25	50
1	1978-07-04	230	225	106	63	59	3004.3	90	2	33	9073.49		472.324	18.6543	1978-06-01	2531.98	0	0	20	30	40
1	1978-07-07	245	230	106	63	59	3004.3	90	3	36	9073.49		472.324	18.6543	1978-06-01	2531.98	0	0	20	30	40
1	1978-06-01	265	190	107	57	48	2225.37	0	1	0	6722.68		0	0	1978-06-01	2225.37	0	0	0	0	0
1	1978-06-05	285	205	107	59	51	2442.36	0	2	4	7377.54		216.986	9.75057	1978-06-01	2225.37	0	0	0	0	0
1	1978-06-09	215	180	107	59	53	2531.98	0	2	8	7648.02		306.607	13.7778	1978-06-01	2225.37	0	0	0	0	0
1	1978-06-13	215	155	107	59	54	2577.39	0	2	12	7785.08		352.023	15.8186	1978-06-01	2225.37	0	0	0	0	0
1	1978-06-16	200	150	107	60	55	2669.44	0	2	15	8062.87		444.065	19.9546	1978-06-01	2225.37	0	0	0	0	0
1	1978-06-20	240	180	107	60	55	2669.44	25	2	19	8062.87		444.065	19.9546	1978-06-01	2225.37	0	0	0	0	25
1	1978-06-23	190	170	107	60	55	2669.44	40	2	22	8062.87		444.065	19.9546	1978-06-01	2225.37	0	0	0	0	40
1	1978-06-27	190	150	107	60	55	2669.44	100	2	26	8062.87		444.065	19.9546	1978-06-01	2225.37	0	0	0	0	100
1	1978-06-30	210	170	107	60	55	2669.44	100	2	29	8062.87		444.065	19.9546	1978-06-01	2225.37	0	0	0	0	100
1	1978-07-04	230	225	107	60	55	2669.44	100	3	33	8062.87		444.065	19.9546	1978-06-01	2225.37	0	0	0	0	100
1	1978-06-01	265	190	108	61	55	2716.06	0	1	0	8203.59		0	0	1978-06-01	2716.06	0	0	0	0	0
1	1978-06-05	285	205	108	62	57	2858.37	0	2	4	8633.06		142.303	5.2393	1978-06-01	2716.06	0	0	0	0	0
1	1978-06-09	215	180	108	63	58	2955.25	0	2	8	8925.46		239.19	8.80648	1978-06-01	2716.06	0	0	0	0	0
1	1978-06-13	215	155	108	65	58	3053.76	0	2	12	9222.74		337.691	12.4331	1978-06-01	2716.06	0	0	0	0	0
1	1978-06-16	200	150	108	65	59	3103.61	0	2	15	9373.21		387.548	14.2687	1978-06-01	2716.06	0	0	0	0	0
1	1978-06-20	240	180	108	65	59	3103.61	5	2	19	9373.21		387.548	14.2687	1978-06-01	2716.06	0	0	0	5	0
1	1978-06-23	190	170	108	65	59	3103.61	5	2	22	9373.21		387.548	14.2687	1978-06-01	2716.06	0	0	0	5	0
1	1978-06-27	190	150	108	65	60	3153.87	10	2	26	9524.89		437.808	16.1192	1978-06-01	2716.06	0	0	0	10	0
1	1978-06-30	210	170	108	66	60	3204.54	20	2	29	9677.79		488.472	17.9845	1978-06-01	2716.06	0	0	0	20	0
1	1978-07-04	230	225	108	66	61	3255.6	40	2	33	9831.92		539.539	19.8647	1978-06-01	2716.06	0	0	0	25	15
1	1978-07-07	245	230	108	66	61	3255.6	100	2	36	9831.92		539.539	19.8647	1978-06-01	2716.06	0	10	20	50	20
1	1978-07-11	190	150	108	66	61	3255.6	100	3	40	9831.92		539.539	19.8647	1978-06-01	2716.06	0	10	20	50	20
1	1978-06-01	265	190	109	59	53	2531.98	0	1	0	7648.02		0	0	1978-06-01	2531.98	0	0	0	0	0
1	1978-06-05	285	205	109	60	54	2623.21	0	2	4	7923.37		91.2352	3.60332	1978-06-01	2531.98	0	0	0	0	0
1	1978-06-09	215	180	109	58	55	2577.39	0	2	8	7785.08		45.4158	1.79369	1978-06-01	2531.98	0	0	0	0	0
1	1978-06-13	215	155	109	59	55	2623.21	0	2	12	7923.37		91.2352	3.60332	1978-06-01	2531.98	0	0	0	0	0
1	1978-06-16	200	150	109	61	56	2763.09	0	2	15	8345.53		231.116	9.12787	1978-06-01	2531.98	0	0	0	0	0
1	1978-06-20	240	180	109	61	56	2763.09	0	2	19	8345.53		231.116	9.12787	1978-06-01	2531.98	0	0	0	0	0
1	1978-06-23	190	170	109	62	57	2858.37	0	2	22	8633.06		326.388	12.8906	1978-06-01	2531.98	0	0	0	0	0
1	1978-06-27	190	150	109	62	59	2955.25	25	2	26	8925.46		423.275	16.7172	1978-06-01	2531.98	0	0	0	5	20
1	1978-06-30	210	170	109	63	59	3004.3	35	2	29	9073.49		472.324	18.6543	1978-06-01	2531.98	0	0	0	10	25
1	1978-07-04	230	225	109	63	59	3004.3	40	2	33	9073.49		472.324	18.6543	1978-06-01	2531.98	0	0	0	15	25
1	1978-07-07	245	230	109	63	59	3004.3	95	2	36	9073.49		472.324	18.6543	1978-06-01	2531.98	0	0	40	15	40
1	1978-07-11	190	150	109	63	59	3004.3	95	3	40	9073.49		472.324	18.6543	1978-06-01	2531.98	0	0	40	15	40
1	1978-06-01	265	190	110	72	56	3307.07	0	1	0	9987.26		0	0	1978-06-01	3307.07	0	0	0	0	0
1	1978-06-05	285	205	110	72	59	3463.91	0	2	4	10460.6		156.836	4.74243	1978-06-01	3307.07	0	0	0	0	0
1	1978-06-09	215	180	110	72	60	3517	0	2	8	10620.8		209.922	6.34766	1978-06-01	3307.07	0	0	0	0	0
1	1978-06-13	215	155	110	80	68	4421.27	0	2	12	13349.9		1114.2	33.6914	1978-06-01	3307.07	0	0	0	0	0
1	1978-06-16	200	150	110	84	70	4787.02	0	2	15	14453.7		1479.95	44.751	1978-06-01	3307.07	0	0	0	0	0
1	1978-06-20	240	180	110	85	72	4975.35	0	2	19	15022.1		1668.27	50.4456	1978-06-01	3307.07	0	0	0	0	0
1	1978-06-23	190	170	110	86	73	5102.91	20	2	22	15407.1		1795.84	54.303	1978-06-01	3307.07	0	0	0	0	20
1	1978-06-27	190	150	110	86	73	5102.91	70	2	26	15407.1		1795.84	54.303	1978-06-01	3307.07	0	0	0	0	70
1	1978-06-30	210	170	110	86	74	5167.3	70	2	29	15601.4		1860.23	56.25	1978-06-01	3307.07	0	0	0	0	70
1	1978-07-04	230	225	110	86	74	5167.3	85	2	33	15601.4		1860.23	56.25	1978-06-01	3307.07	0	0	15	0	70
1	1978-07-07	245	230	110	86	74	5167.3	85	3	36	15601.4		1860.23	56.25	1978-06-01	3307.07	0	0	15	0	70
1	1978-06-01	265	190	111	64	54	2810.53	0	1	0	8488.68		0	0	1978-06-01	2810.53	0	0	0	0	0
1	1978-06-05	285	205	111	67	55	3004.3	0	2	4	9073.49		193.774	6.89457	1978-06-01	2810.53	0	0	0	0	0
1	1978-06-09	215	180	111	68	55	3053.76	0	2	8	9222.74		243.227	8.65412	1978-06-01	2810.53	0	0	0	0	0
1	1978-06-13	215	155	111	68	55	3053.76	0	2	12	9222.74		243.227	8.65412	1978-06-01	2810.53	0	0	0	0	0
1	1978-06-16	200	150	111	70	56	3204.54	0	2	15	9677.79		394.007	14.019	1978-06-01	2810.53	0	0	0	0	0
1	1978-06-20	240	180	111	70	56	3204.54	0	2	19	9677.79		394.007	14.019	1978-06-01	2810.53	0	0	0	0	0
1	1978-06-23	190	170	111	70	56	3204.54	0	2	22	9677.79		394.007	14.019	1978-06-01	2810.53	0	0	0	0	0
1	1978-06-27	190	150	111	70	57	3255.6	0	2	26	9831.92		445.074	15.836	1978-06-01	2810.53	0	0	0	0	0
1	1978-06-30	210	170	111	71	58	3358.95	100	2	29	10143.8		548.42	19.5131	1978-06-01	2810.53	0	0	0	0	100
1	1978-07-04	230	225	111	71	58	3358.95	100	2	33	10143.8		548.42	19.5131	1978-06-01	2810.53	0	0	0	0	100
1	1978-07-07	245	230	111	71	58	3358.95	100	2	36	10143.8		548.42	19.5131	1978-06-01	2810.53	0	0	50	0	50
1	1978-07-11	190	150	111	71	58	3358.95	100	3	40	10143.8		548.42	19.5131	1978-06-01	2810.53	0	0	50	0	50
1	1978-06-01	265	190	112	78	70	4421.27	0	1	0	13349.9		0	0	1978-06-01	4421.27	0	0	0	0	0
1	1978-06-05	285	205	112	80	71	4602.33	0	2	4	13896.3		181.057	4.09514	1978-06-01	4421.27	0	0	0	0	0
1	1978-06-09	215	180	112	80	72	4663.49	0	2	8	14080.9		242.217	5.47845	1978-06-01	4421.27	0	0	0	0	0
1	1978-06-13	215	155	112	81	73	4787.02	0	2	12	14453.7		365.748	8.27246	1978-06-01	4421.27	0	0	0	0	0
1	1978-06-16	200	150	112	83	75	5038.93	0	2	15	15214		617.654	13.9701	1978-06-01	4421.27	0	0	0	0	0
1	1978-06-20	240	180	112	83	75	5038.93	0	2	19	15214		617.654	13.9701	1978-06-01	4421.27	0	0	0	0	0
1	1978-06-23	190	170	112	83	75	5038.93	2	2	22	15214		617.654	13.9701	1978-06-01	4421.27	0	0	0	2	0
1	1978-06-27	190	150	112	84	75	5102.91	25	2	26	15407.1		681.64	15.4173	1978-06-01	4421.27	0	0	0	5	20
1	1978-06-30	210	170	112	85	75	5167.3	25	2	29	15601.4		746.029	16.8736	1978-06-01	4421.27	0	0	0	10	15
1	1978-07-04	230	225	112	85	75	5167.3	55	2	33	15601.4		746.029	16.8736	1978-06-01	4421.27	0	0	0	15	40
1	1978-07-07	245	230	112	85	75	5167.3	100	2	36	15601.4		746.029	16.8736	1978-06-01	4421.27	0	0	0	25	75
1	1978-07-11	190	150	112	85	75	5167.3	100	3	40	15601.4		746.029	16.8736	1978-06-01	4421.27	0	0	0	25	75
1	1978-06-01	265	190	113	49	44	1745.78	0	1	0	5275.27		0	0	1978-06-01	1745.78	0	0	0	0	0
1	1978-06-05	285	205	113	52	47	1978.31	0	2	4	5977.05		232.529	13.3195	1978-06-01	1745.78	0	0	0	0	0
1	1978-06-09	215	180	113	55	49	2183.19	0	2	8	6595.36		437.404	25.0549	1978-06-01	1745.78	0	0	0	0	0
1	1978-06-13	215	155	113	58	50	2354.35	0	2	12	7111.94		608.571	34.8595	1978-06-01	1745.78	0	0	0	0	0
1	1978-06-16	200	150	113	58	51	2398.15	0	2	15	7244.13		652.372	37.3685	1978-06-01	1745.78	0	0	0	0	0
1	1978-06-20	240	180	113	58	51	2398.15	0	2	19	7244.13		652.372	37.3685	1978-06-01	1745.78	0	0	0	0	0
1	1978-06-23	190	170	113	59	51	2442.36	21	2	22	7377.54		696.577	39.9006	1978-06-01	1745.78	0	0	0	1	20
1	1978-06-27	190	150	113	59	51	2442.36	15	2	26	7377.54		696.577	39.9006	1978-06-01	1745.78	0	0	0	5	10
1	1978-06-30	210	170	113	59	52	2486.97	20	2	29	7512.17		741.185	42.4558	1978-06-01	1745.78	0	0	0	10	10
1	1978-07-04	230	225	113	59	52	2486.97	35	2	33	7512.17		741.185	42.4558	1978-06-01	1745.78	0	0	0	10	25
1	1978-07-07	245	230	113	59	52	2486.97	75	2	36	7512.17		741.185	42.4558	1978-06-01	1745.78	0	0	0	35	40
1	1978-07-11	190	150	113	59	52	2486.97	75	3	40	7512.17		741.185	42.4558	1978-06-01	1745.78	0	0	0	35	40
1	1978-06-01	265	190	114	62	58	2906.61	0	1	0	8778.65		0	0	1978-06-01	2906.61	0	0	0	0	0
1	1978-06-05	285	205	114	63	59	3004.3	0	2	4	9073.49		97.6943	3.36111	1978-06-01	2906.61	0	0	0	0	0
1	1978-06-09	215	180	114	64	60	3103.61	0	2	8	9373.21		197.003	6.77778	1978-06-01	2906.61	0	0	0	0	0
1	1978-06-13	215	155	114	66	61	3255.6	0	2	12	9831.92		348.995	12.0069	1978-06-01	2906.61	0	0	0	0	0
1	1978-06-16	200	150	114	66	61	3255.6	0	2	15	9831.92		348.995	12.0069	1978-06-01	2906.61	0	0	0	0	0
1	1978-06-20	240	180	114	66	61	3255.6	0	2	19	9831.92		348.995	12.0069	1978-06-01	2906.61	0	0	0	0	0
1	1978-06-23	190	170	114	66	61	3255.6	25	2	22	9831.92		348.995	12.0069	1978-06-01	2906.61	0	0	0	0	25
1	1978-06-27	190	150	114	66	61	3255.6	40	2	26	9831.92		348.995	12.0069	1978-06-01	2906.61	0	0	0	0	40
1	1978-06-30	210	170	114	66	61	3255.6	100	2	29	9831.92		348.995	12.0069	1978-06-01	2906.61	0	0	0	0	100
1	1978-07-04	230	225	114	66	61	3255.6	100	3	33	9831.92		348.995	12.0069	1978-06-01	2906.61	0	0	0	0	100
1	1978-06-01	265	190	115	62	50	2531.98	0	1	0	7648.02		0	0	1978-06-01	2531.98	0	0	0	0	0
1	1978-06-05	285	205	115	68	56	3103.61	0	2	4	9373.21		571.633	22.5765	1978-06-01	2531.98	0	0	0	0	0
1	1978-06-09	215	180	115	69	57	3204.54	0	2	8	9677.79		672.557	26.5625	1978-06-01	2531.98	0	0	0	0	0
1	1978-06-13	215	155	115	71	59	3411.23	0	2	12	10301.6		879.249	34.7258	1978-06-01	2531.98	0	0	0	0	0
1	1978-06-16	200	150	115	71	59	3411.23	0	2	15	10301.6		879.249	34.7258	1978-06-01	2531.98	0	0	0	0	0
1	1978-06-20	240	180	115	71	59	3411.23	0	2	19	10301.6		879.249	34.7258	1978-06-01	2531.98	0	0	0	0	0
1	1978-06-23	190	170	115	71	60	3463.91	0	2	22	10460.6		931.931	36.8064	1978-06-01	2531.98	0	0	0	0	0
1	1978-06-27	190	150	115	71	60	3463.91	100	2	26	10460.6		931.931	36.8064	1978-06-01	2531.98	0	0	0	0	100
1	1978-06-30	210	170	115	71	60	3463.91	100	2	29	10460.6		931.931	36.8064	1978-06-01	2531.98	0	0	0	5	95
1	1978-07-04	230	225	115	71	60	3463.91	100	2	33	10460.6		931.931	36.8064	1978-06-01	2531.98	0	0	0	10	90
1	1978-07-07	245	230	115	71	60	3463.91	85	2	36	10460.6		931.931	36.8064	1978-06-01	2531.98	0	0	30	15	40
1	1978-07-11	190	150	115	71	60	3463.91	85	3	40	10460.6		931.931	36.8064	1978-06-01	2531.98	0	0	30	15	40
1	1978-06-05	285	205	116	61	59	2906.61	0	1	0	8778.65		0	0	1978-06-05	2906.61	0	0	0	0	0
1	1978-06-09	215	180	116	61	59	2906.61	0	2	4	8778.65		0	0	1978-06-05	2906.61	0	0	0	0	0
1	1978-06-13	215	155	116	61	59	2906.61	0	2	8	8778.65		0	0	1978-06-05	2906.61	0	0	0	0	0
1	1978-06-16	200	150	116	61	60	2955.25	50	2	11	8925.46		48.6453	1.67361	1978-06-05	2906.61	0	0	0	0	50
1	1978-06-20	240	180	116	61	60	2955.25	100	2	15	8925.46		48.6453	1.67361	1978-06-05	2906.61	0	0	0	0	100
1	1978-06-23	190	170	116	61	60	2955.25	100	2	18	8925.46		48.6453	1.67361	1978-06-05	2906.61	0	0	25	0	75
1	1978-06-27	190	150	116	61	60	2955.25	100	3	22	8925.46		48.6453	1.67361	1978-06-05	2906.61	0	0	25	0	75
1	1978-06-05	285	205	117	51	47	1938.55	0	1	0	5857.04		0	0	1978-06-05	1938.55	0	0	0	0	0
1	1978-06-09	215	180	117	53	48	2059.05	0	2	4	6220.72		120.503	6.21616	1978-06-05	1938.55	0	0	0	0	0
1	1978-06-13	215	155	117	55	48	2141.4	0	2	8	6469.26		202.857	10.4644	1978-06-05	1938.55	0	0	0	0	0
1	1978-06-16	200	150	117	55	48	2141.4	0	2	11	6469.26		202.857	10.4644	1978-06-05	1938.55	0	0	0	0	0
1	1978-06-20	240	180	117	55	48	2141.4	0	2	15	6469.26		202.857	10.4644	1978-06-05	1938.55	0	0	0	0	0
1	1978-06-23	190	170	117	55	48	2141.4	0	2	18	6469.26		202.857	10.4644	1978-06-05	1938.55	0	0	0	0	0
1	1978-06-27	190	150	117	55	48	2141.4	0	2	22	6469.26		202.857	10.4644	1978-06-05	1938.55	0	0	0	0	0
1	1978-06-30	210	170	117	55	48	2141.4	20	2	25	6469.26		202.857	10.4644	1978-06-05	1938.55	0	0	0	0	20
1	1978-07-04	230	225	117	55	48	2141.4	70	2	29	6469.26		202.857	10.4644	1978-06-05	1938.55	0	0	20	0	50
1	1978-07-07	245	230	117	55	48	2141.4	70	3	32	6469.26		202.857	10.4644	1978-06-05	1938.55	0	0	20	0	50
1	1978-06-05	285	205	118	71	63	3624.38	0	1	0	10944.9		0	0	1978-06-05	3624.38	0	0	0	0	0
1	1978-06-09	215	180	118	71	63	3624.38	0	3	4	10944.9		0	0	1978-06-05	3624.38	0	0	0	0	0
1	1978-06-05	285	205	119	50	46	1860.23	0	1	0	5620.68		0	0	1978-06-05	1860.23	0	0	0	0	0
1	1978-06-09	215	180	119	56	50	2267.96	0	2	4	6851.21		407.733	21.9184	1978-06-05	1860.23	0	0	0	0	0
1	1978-06-13	215	155	119	58	50	2354.35	0	2	8	7111.94		494.123	26.5625	1978-06-05	1860.23	0	0	0	0	0
1	1978-06-16	200	150	119	58	51	2398.15	0	2	11	7244.13		537.924	28.9171	1978-06-05	1860.23	0	0	0	0	0
1	1978-06-20	240	180	119	58	51	2398.15	0	2	15	7244.13		537.924	28.9171	1978-06-05	1860.23	0	0	0	0	0
1	1978-06-23	190	170	119	58	51	2398.15	0	2	18	7244.13		537.924	28.9171	1978-06-05	1860.23	0	0	0	0	0
1	1978-06-27	190	150	119	58	51	2398.15	50	2	22	7244.13		537.924	28.9171	1978-06-05	1860.23	0	0	0	0	50
1	1978-06-30	210	170	119	58	51	2398.15	100	2	25	7244.13		537.924	28.9171	1978-06-05	1860.23	0	0	0	0	100
1	1978-07-04	230	225	119	58	51	2398.15	100	3	29	7244.13		537.924	28.9171	1978-06-05	1860.23	0	0	0	0	100
1	1978-06-05	285	205	120	49	41	1634.97	0	1	0	4940.84		0	0	1978-06-05	1634.97	0	0	0	0	0
1	1978-06-09	215	180	120	50	43	1745.78	0	2	4	5275.27		110.814	6.77778	1978-06-05	1634.97	0	0	0	0	0
1	1978-06-13	215	155	120	50	43	1745.78	0	2	8	5275.27		110.814	6.77778	1978-06-05	1634.97	0	0	0	0	0
1	1978-06-16	200	150	120	51	43	1783.53	0	2	11	5389.19		148.56	9.08642	1978-06-05	1634.97	0	0	0	0	0
1	1978-06-20	240	180	120	51	43	1783.53	0	2	15	5389.19		148.56	9.08642	1978-06-05	1634.97	0	0	0	0	0
1	1978-06-23	190	170	120	51	43	1783.53	0	2	18	5389.19		148.56	9.08642	1978-06-05	1634.97	0	0	0	0	0
1	1978-06-27	190	150	120	51	43	1783.53	10	2	22	5389.19		148.56	9.08642	1978-06-05	1634.97	0	0	0	0	10
1	1978-06-30	210	170	120	52	44	1860.23	100	2	25	5620.68		225.262	13.7778	1978-06-05	1634.97	0	0	0	1	99
1	1978-07-04	230	225	120	53	44	1899.19	100	2	29	5738.25		264.219	16.1605	1978-06-05	1634.97	1	0	0	5	94
1	1978-07-07	245	230	120	53	44	1899.19	100	3	32	5738.25		264.219	16.1605	1978-06-05	1634.97	1	0	0	5	94
1	1978-06-05	285	205	121	86	72	5038.93	0	1	0	15214		0	0	1978-06-05	5038.93	0	0	0	0	0
1	1978-06-09	215	180	121	89	79	5696.95	0	2	4	17199.9		658.024	13.0588	1978-06-05	5038.93	0	0	0	0	0
1	1978-06-13	215	155	121	89	79	5696.95	0	2	8	17199.9		658.024	13.0588	1978-06-05	5038.93	0	0	0	0	0
1	1978-06-16	200	150	121	89	79	5696.95	0	2	11	17199.9		658.024	13.0588	1978-06-05	5038.93	0	0	0	0	0
1	1978-06-20	240	180	121	90	79	5764.98	0	2	15	17405.2		726.047	14.4087	1978-06-05	5038.93	0	0	0	0	0
1	1978-06-23	190	170	121	91	80	5902.23	0	2	18	17819.4		863.303	17.1327	1978-06-05	5038.93	0	0	0	0	0
1	1978-06-27	190	150	121	91	80	5902.23	2	2	22	17819.4		863.303	17.1327	1978-06-05	5038.93	0	0	0	1	1
1	1978-06-30	210	170	121	92	80	5971.47	2	2	25	18028.4		932.537	18.5066	1978-06-05	5038.93	0	0	0	2	0
1	1978-07-04	230	225	121	92	80	5971.47	20	2	29	18028.4		932.537	18.5066	1978-06-05	5038.93	0	0	0	10	10
1	1978-07-07	245	230	121	92	80	5971.47	100	2	32	18028.4		932.537	18.5066	1978-06-05	5038.93	0	0	5	25	70
1	1978-07-11	190	150	121	92	80	5971.47	100	3	36	18028.4		932.537	18.5066	1978-06-05	5038.93	0	0	5	25	70
1	1978-06-05	285	205	122	78	69	4361.73	0	1	0	13170.2		0	0	1978-06-05	4361.73	0	0	0	0	0
1	1978-06-09	215	180	122	87	73	5167.3	0	2	4	15601.4		805.575	18.4692	1978-06-05	4361.73	0	0	0	0	0
1	1978-06-13	215	155	122	90	76	5562.12	0	2	8	16793		1200.39	27.5209	1978-06-05	4361.73	0	0	0	0	0
1	1978-06-16	200	150	122	90	77	5629.33	0	2	11	16995.8		1267.6	29.062	1978-06-05	4361.73	0	0	0	0	0
1	1978-06-20	240	180	122	90	77	5629.33	0	2	15	16995.8		1267.6	29.062	1978-06-05	4361.73	0	0	0	0	0
1	1978-06-23	190	170	122	90	77	5629.33	0	2	18	16995.8		1267.6	29.062	1978-06-05	4361.73	0	0	0	0	0
1	1978-06-27	190	150	122	90	77	5629.33	0	2	22	16995.8		1267.6	29.062	1978-06-05	4361.73	0	0	0	0	0
1	1978-06-30	210	170	122	91	77	5696.95	35	2	25	17199.9		1335.22	30.6122	1978-06-05	4361.73	0	0	0	5	30
1	1978-07-04	230	225	122	91	77	5696.95	45	2	29	17199.9		1335.22	30.6122	1978-06-05	4361.73	0	0	0	15	30
1	1978-07-07	245	230	122	91	77	5696.95	50	2	32	17199.9		1335.22	30.6122	1978-06-05	4361.73	0	0	0	20	30
1	1978-07-11	190	150	122	91	77	5696.95	100	2	36	17199.9		1335.22	30.6122	1978-06-05	4361.73	0	0	0	40	60
1	1978-07-14	250	155	122	91	77	5696.95	100	3	39	17199.9		1335.22	30.6122	1978-06-05	4361.73	0	0	0	40	60
1	1978-06-05	285	205	123	60	59	2858.37	0	1	0	8633.06		0	0	1978-06-05	2858.37	0	0	0	0	0
1	1978-06-09	215	180	123	60	59	2858.37	0	2	4	8633.06		0	0	1978-06-05	2858.37	0	0	0	0	0
1	1978-06-13	215	155	123	61	60	2955.25	0	2	8	8925.46		96.8869	3.38959	1978-06-05	2858.37	0	0	0	0	0
1	1978-06-16	200	150	123	61	60	2955.25	0	2	11	8925.46		96.8869	3.38959	1978-06-05	2858.37	0	0	0	0	0
1	1978-06-20	240	180	123	62	61	3053.76	0	2	15	9222.74		195.389	6.83568	1978-06-05	2858.37	0	0	0	0	0
1	1978-06-23	190	170	123	62	61	3053.76	0	2	18	9222.74		195.389	6.83568	1978-06-05	2858.37	0	0	0	0	0
1	1978-06-27	190	150	123	62	61	3053.76	100	2	22	9222.74		195.389	6.83568	1978-06-05	2858.37	0	0	0	0	100
1	1978-06-30	210	170	123	62	61	3053.76	100	2	25	9222.74		195.389	6.83568	1978-06-05	2858.37	0	0	40	0	60
1	1978-07-04	230	225	123	62	61	3053.76	100	3	29	9222.74		195.389	6.83568	1978-06-05	2858.37	0	0	40	0	60
1	1978-06-05	285	205	124	75	67	4070.06	0	1	0	12289.9		0	0	1978-06-05	4070.06	0	0	0	0	0
1	1978-06-09	215	180	124	75	67	4070.06	0	2	4	12289.9		0	0	1978-06-05	4070.06	0	0	0	0	0
1	1978-06-13	215	155	124	75	70	4243.85	0	2	8	12814.4		173.791	4.26999	1978-06-05	4070.06	0	0	0	0	0
1	1978-06-16	200	150	124	78	71	4481.22	0	2	11	13530.8		411.164	10.1022	1978-06-05	4070.06	0	0	0	0	0
1	1978-06-20	240	180	124	80	71	4602.33	0	2	15	13896.3		532.273	13.0778	1978-06-05	4070.06	0	0	0	0	0
1	1978-06-23	190	170	124	80	72	4663.49	0	2	18	14080.9		593.433	14.5804	1978-06-05	4070.06	0	0	0	0	0
1	1978-06-27	190	150	124	80	72	4663.49	5	2	22	14080.9		593.433	14.5804	1978-06-05	4070.06	0	0	0	0	5
1	1978-06-30	210	170	124	80	72	4663.49	40	2	25	14080.9		593.433	14.5804	1978-06-05	4070.06	0	0	0	0	40
1	1978-07-04	230	225	124	81	72	4725.06	66	2	29	14266.7		654.996	16.093	1978-06-05	4070.06	0	0	15	1	50
1	1978-07-07	245	230	124	81	72	4725.06	75	2	32	14266.7		654.996	16.093	1978-06-05	4070.06	0	0	40	5	30
1	1978-07-11	190	150	124	81	72	4725.06	75	3	36	14266.7		654.996	16.093	1978-06-05	4070.06	0	0	40	5	30
1	1978-06-05	285	205	125	55	51	2267.96	0	1	0	6851.21		0	0	1978-06-05	2267.96	0	0	0	0	0
1	1978-06-09	215	180	125	55	51	2267.96	0	2	4	6851.21		0	0	1978-06-05	2267.96	0	0	0	0	0
1	1978-06-13	215	155	125	55	51	2267.96	0	2	8	6851.21		0	0	1978-06-05	2267.96	0	0	0	0	0
1	1978-06-16	200	150	125	55	53	2354.35	0	2	11	7111.94		86.3909	3.80918	1978-06-05	2267.96	0	0	0	0	0
1	1978-06-20	240	180	125	55	53	2354.35	0	2	15	7111.94		86.3909	3.80918	1978-06-05	2267.96	0	0	0	0	0
1	1978-06-23	190	170	125	56	54	2442.36	0	2	18	7377.54		174.396	7.68957	1978-06-05	2267.96	0	0	0	0	0
1	1978-06-27	190	150	125	56	54	2442.36	0	2	22	7377.54		174.396	7.68957	1978-06-05	2267.96	0	0	0	0	0
1	1978-06-30	210	170	125	57	54	2486.97	5	2	25	7512.17		219.005	9.65646	1978-06-05	2267.96	0	0	0	0	5
1	1978-07-04	230	225	125	57	54	2486.97	12	2	29	7512.17		219.005	9.65646	1978-06-05	2267.96	0	0	0	2	10
1	1978-07-07	245	230	125	57	54	2486.97	45	2	32	7512.17		219.005	9.65646	1978-06-05	2267.96	0	0	10	15	20
1	1978-07-11	190	150	125	57	54	2486.97	45	3	36	7512.17		219.005	9.65646	1978-06-05	2267.96	0	0	10	15	20
1	1978-06-05	285	205	126	60	53	2577.39	0	1	0	7785.08		0	0	1978-06-05	2577.39	0	0	0	0	0
1	1978-06-09	215	180	126	61	55	2716.06	0	2	4	8203.59		138.669	5.38022	1978-06-05	2577.39	0	0	0	0	0
1	1978-06-13	215	155	126	64	57	2955.25	0	2	8	8925.46		377.859	14.6605	1978-06-05	2577.39	0	0	0	0	0
1	1978-06-16	200	150	126	64	57	2955.25	100	2	11	8925.46		377.859	14.6605	1978-06-05	2577.39	0	0	0	0	100
1	1978-06-20	240	180	126	64	57	2955.25	100	2	15	8925.46		377.859	14.6605	1978-06-05	2577.39	0	0	0	0	100
1	1978-06-23	190	170	126	64	57	2955.25	100	2	18	8925.46		377.859	14.6605	1978-06-05	2577.39	0	0	0	0	100
1	1978-06-27	190	150	126	65	57	3004.3	100	2	22	9073.49		426.908	16.5636	1978-06-05	2577.39	0	0	0	0	100
1	1978-06-30	210	170	126	65	57	3004.3	100	2	25	9073.49		426.908	16.5636	1978-06-05	2577.39	0	0	0	1	99
1	1978-07-04	230	225	126	65	57	3004.3	100	2	29	9073.49		426.908	16.5636	1978-06-05	2577.39	0	0	0	5	95
1	1978-07-07	245	230	126	65	57	3004.3	100	2	32	9073.49		426.908	16.5636	1978-06-05	2577.39	0	0	0	20	80
1	1978-07-11	190	150	126	65	57	3004.3	100	3	36	9073.49		426.908	16.5636	1978-06-05	2577.39	0	0	0	20	80
1	1978-06-05	285	205	127	54	49	2141.4	0	1	0	6469.26		0	0	1978-06-05	2141.4	0	0	0	0	0
1	1978-06-09	215	180	127	56	50	2267.96	0	2	4	6851.21		126.559	5.91008	1978-06-05	2141.4	0	0	0	0	0
1	1978-06-13	215	155	127	56	50	2267.96	0	2	8	6851.21		126.559	5.91008	1978-06-05	2141.4	0	0	0	0	0
1	1978-06-16	200	150	127	56	50	2267.96	0	2	11	6851.21		126.559	5.91008	1978-06-05	2141.4	0	0	0	0	0
1	1978-06-20	240	180	127	56	50	2267.96	100	2	15	6851.21		126.559	5.91008	1978-06-05	2141.4	0	0	0	0	100
1	1978-06-23	190	170	127	56	50	2267.96	100	2	18	6851.21		126.559	5.91008	1978-06-05	2141.4	0	0	0	0	100
1	1978-06-27	190	150	127	56	50	2267.96	100	2	22	6851.21		126.559	5.91008	1978-06-05	2141.4	0	0	40	0	60
1	1978-06-30	210	170	127	56	50	2267.96	100	2	25	6851.21		126.559	5.91008	1978-06-05	2141.4	0	0	80	0	20
1	1978-07-04	230	225	127	56	50	2267.96	100	3	29	6851.21		126.559	5.91008	1978-06-05	2141.4	0	0	80	0	20
1	1978-06-05	285	205	128	45	38	1390.53	0	1	0	4203.12		0	0	1978-06-05	1390.53	0	0	0	0	0
1	1978-06-09	215	180	128	46	38	1424.24	0	2	4	4304.86		33.7086	2.42415	1978-06-05	1390.53	0	0	0	0	0
1	1978-06-13	215	155	128	47	39	1492.87	0	2	8	4511.98		102.337	7.35956	1978-06-05	1390.53	0	0	0	0	0
1	1978-06-16	200	150	128	48	39	1527.79	0	2	11	4617.36		137.257	9.87081	1978-06-05	1390.53	0	0	0	0	0
1	1978-06-20	240	180	128	48	39	1527.79	0	2	15	4617.36		137.257	9.87081	1978-06-05	1390.53	0	0	0	0	0
1	1978-06-23	190	170	128	48	40	1563.11	0	2	18	4723.97		172.58	12.4111	1978-06-05	1390.53	0	0	0	0	0
1	1978-06-27	190	150	128	50	41	1671.5	0	2	22	5051.1		280.972	20.2061	1978-06-05	1390.53	0	0	0	0	0
1	1978-06-30	210	170	128	51	45	1860.23	100	2	25	5620.68		469.7	33.7785	1978-06-05	1390.53	0	0	0	0	100
1	1978-07-04	230	225	128	51	45	1860.23	100	2	29	5620.68		469.7	33.7785	1978-06-05	1390.53	0	0	0	5	95
1	1978-07-07	245	230	128	51	45	1860.23	100	2	32	5620.68		469.7	33.7785	1978-06-05	1390.53	0	0	0	25	75
1	1978-07-11	190	150	128	52	45	1899.19	100	2	36	5738.25		508.656	36.5801	1978-06-05	1390.53	0	0	0	60	40
1	1978-07-14	250	155	128	52	45	1899.19	100	3	39	5738.25		508.656	36.5801	1978-06-05	1390.53	0	0	0	60	40
1	1978-06-05	285	205	129	54	46	2018.48	0	1	0	6098.27		0	0	1978-06-05	2018.48	0	0	0	0	0
1	1978-06-09	215	180	129	56	47	2141.4	0	2	4	6469.26		122.925	6.09	1978-06-05	2018.48	0	0	0	0	0
1	1978-06-13	215	155	129	60	49	2398.15	0	2	8	7244.13		379.676	18.81	1978-06-05	2018.48	0	0	0	0	0
1	1978-06-16	200	150	129	62	52	2623.21	0	2	11	7923.37		604.736	29.96	1978-06-05	2018.48	0	0	0	0	0
1	1978-06-20	240	180	129	62	52	2623.21	0	2	15	7923.37		604.736	29.96	1978-06-05	2018.48	0	0	0	0	0
1	1978-06-23	190	170	129	62	52	2623.21	0	2	18	7923.37		604.736	29.96	1978-06-05	2018.48	0	0	0	0	0
1	1978-06-27	190	150	129	62	52	2623.21	2	2	22	7923.37		604.736	29.96	1978-06-05	2018.48	0	0	0	2	0
1	1978-06-30	210	170	129	62	53	2669.44	20	2	25	8062.87		650.959	32.25	1978-06-05	2018.48	0	0	0	5	15
1	1978-07-04	230	225	129	62	53	2669.44	25	2	29	8062.87		650.959	32.25	1978-06-05	2018.48	0	0	0	15	10
1	1978-07-07	245	230	129	62	53	2669.44	100	2	32	8062.87		650.959	32.25	1978-06-05	2018.48	0	0	0	20	80
1	1978-07-11	190	150	129	62	53	2669.44	100	3	36	8062.87		650.959	32.25	1978-06-05	2018.48	0	0	0	20	80
1	1978-06-05	285	205	130	54	51	2225.37	0	1	0	6722.68		0	0	1978-06-05	2225.37	0	0	0	0	0
1	1978-06-09	215	180	130	54	52	2267.96	0	2	4	6851.21		42.5899	1.91383	1978-06-05	2225.37	0	0	0	0	0
1	1978-06-13	215	155	130	54	53	2310.96	0	2	8	6980.97		85.5835	3.8458	1978-06-05	2225.37	0	0	0	0	0
1	1978-06-16	200	150	130	54	55	2398.15	0	2	11	7244.13		172.782	7.76417	1978-06-05	2225.37	0	0	0	0	0
1	1978-06-20	240	180	130	54	55	2398.15	100	2	15	7244.13		172.782	7.76417	1978-06-05	2225.37	0	0	0	0	100
1	1978-06-23	190	170	130	54	55	2398.15	100	2	18	7244.13		172.782	7.76417	1978-06-05	2225.37	0	0	0	0	100
1	1978-06-27	190	150	130	54	55	2398.15	100	2	22	7244.13		172.782	7.76417	1978-06-05	2225.37	0	0	25	0	75
1	1978-06-30	210	170	130	54	55	2398.15	100	3	25	7244.13		172.782	7.76417	1978-06-05	2225.37	0	0	25	0	75
1	1978-06-05	285	205	131	50	45	1821.68	0	1	0	5504.33		0	0	1978-06-05	1821.68	0	0	0	0	0
1	1978-06-09	215	180	131	51	46	1899.19	0	2	4	5738.25		77.5096	4.25485	1978-06-05	1821.68	0	0	0	0	0
1	1978-06-13	215	155	131	51	46	1899.19	0	2	8	5738.25		77.5096	4.25485	1978-06-05	1821.68	0	0	0	0	0
1	1978-06-16	200	150	131	51	46	1899.19	0	2	11	5738.25		77.5096	4.25485	1978-06-05	1821.68	0	0	0	0	0
1	1978-06-20	240	180	131	52	47	1978.31	0	2	15	5977.05		156.634	8.59834	1978-06-05	1821.68	0	0	0	0	0
1	1978-06-23	190	170	131	52	47	1978.31	10	2	18	5977.05		156.634	8.59834	1978-06-05	1821.68	0	0	0	0	10
1	1978-06-27	190	150	131	52	47	1978.31	100	2	22	5977.05		156.634	8.59834	1978-06-05	1821.68	0	0	0	0	100
1	1978-06-30	210	170	131	52	47	1978.31	100	2	25	5977.05		156.634	8.59834	1978-06-05	1821.68	0	0	0	0	100
1	1978-07-04	230	225	131	52	47	1978.31	100	3	29	5977.05		156.634	8.59834	1978-06-05	1821.68	0	0	0	0	100
1	1978-06-05	285	205	132	51	45	1860.23	0	1	0	5620.68		0	0	1978-06-05	1860.23	0	0	0	0	0
1	1978-06-09	215	180	132	51	47	1938.55	0	2	4	5857.04		78.3169	4.21007	1978-06-05	1860.23	0	0	0	0	0
1	1978-06-13	215	155	132	51	48	1978.31	0	2	8	5977.05		118.081	6.34766	1978-06-05	1860.23	0	0	0	0	0
1	1978-06-16	200	150	132	52	48	2018.48	0	2	11	6098.27		158.249	8.50694	1978-06-05	1860.23	0	0	0	0	0
1	1978-06-20	240	180	132	52	48	2018.48	0	2	15	6098.27		158.249	8.50694	1978-06-05	1860.23	0	0	0	0	0
1	1978-06-23	190	170	132	52	48	2018.48	25	2	18	6098.27		158.249	8.50694	1978-06-05	1860.23	0	0	0	0	25
1	1978-06-27	190	150	132	52	48	2018.48	26	2	22	6098.27		158.249	8.50694	1978-06-05	1860.23	0	0	0	1	25
1	1978-06-30	210	170	132	52	48	2018.48	61	2	25	6098.27		158.249	8.50694	1978-06-05	1860.23	0	0	0	1	60
1	1978-07-04	230	225	132	52	48	2018.48	61	3	29	6098.27		158.249	8.50694	1978-06-05	1860.23	0	0	0	1	60
1	1978-06-05	285	205	133	53	49	2100.02	0	1	0	6344.38		0	0	1978-06-05	2100.02	0	0	0	0	0
1	1978-06-09	215	180	133	53	49	2100.02	0	2	4	6344.38		0	0	1978-06-05	2100.02	0	0	0	0	0
1	1978-06-13	215	155	133	53	50	2141.4	0	2	8	6469.26		41.3788	1.9704	1978-06-05	2100.02	0	0	0	0	0
1	1978-06-16	200	150	133	55	53	2354.35	0	2	11	7111.94		254.328	12.1107	1978-06-05	2100.02	0	0	0	0	0
1	1978-06-20	240	180	133	55	53	2354.35	0	2	15	7111.94		254.328	12.1107	1978-06-05	2100.02	0	0	0	0	0
1	1978-06-23	190	170	133	57	54	2486.97	0	2	18	7512.17		386.942	18.4256	1978-06-05	2100.02	0	0	0	0	0
1	1978-06-27	190	150	133	57	54	2486.97	15	2	22	7512.17		386.942	18.4256	1978-06-05	2100.02	0	0	0	0	15
1	1978-06-30	210	170	133	57	54	2486.97	60	2	25	7512.17		386.942	18.4256	1978-06-05	2100.02	0	0	0	0	60
1	1978-07-04	230	225	133	57	54	2486.97	62	2	29	7512.17		386.942	18.4256	1978-06-05	2100.02	0	0	30	2	30
1	1978-07-07	245	230	133	57	54	2486.97	62	3	32	7512.17		386.942	18.4256	1978-06-05	2100.02	0	0	30	2	30
1	1978-06-05	285	205	134	62	54	2716.06	0	1	0	8203.59		0	0	1978-06-05	2716.06	0	0	0	0	0
1	1978-06-09	215	180	134	62	54	2716.06	0	2	4	8203.59		0	0	1978-06-05	2716.06	0	0	0	0	0
1	1978-06-13	215	155	134	64	55	2858.37	0	2	8	8633.06		142.303	5.2393	1978-06-05	2716.06	0	0	0	0	0
1	1978-06-16	200	150	134	64	55	2858.37	30	2	11	8633.06		142.303	5.2393	1978-06-05	2716.06	0	0	0	0	30
1	1978-06-20	240	180	134	64	55	2858.37	85	2	15	8633.06		142.303	5.2393	1978-06-05	2716.06	0	0	5	0	80
1	1978-06-23	190	170	134	64	55	2858.37	100	2	18	8633.06		142.303	5.2393	1978-06-05	2716.06	0	0	10	0	90
1	1978-06-27	190	150	134	65	55	2906.61	100	2	22	8778.65		190.544	7.01546	1978-06-05	2716.06	0	0	15	0	85
1	1978-06-30	210	170	134	65	56	2955.25	100	2	25	8925.46		239.19	8.80648	1978-06-05	2716.06	0	0	30	0	70
1	1978-07-04	230	225	134	65	56	2955.25	100	3	29	8925.46		239.19	8.80648	1978-06-05	2716.06	0	0	30	0	70
1	1978-06-05	285	205	135	50	46	1860.23	0	1	0	5620.68		0	0	1978-06-05	1860.23	0	0	0	0	0
1	1978-06-09	215	180	135	50	47	1899.19	0	2	4	5738.25		38.9566	2.09418	1978-06-05	1860.23	0	0	0	0	0
1	1978-06-13	215	155	135	56	51	2310.96	0	2	8	6980.97		450.726	24.2296	1978-06-05	1860.23	0	0	0	0	0
1	1978-06-16	200	150	135	56	54	2442.36	0	2	11	7377.54		582.129	31.2934	1978-06-05	1860.23	0	0	0	0	0
1	1978-06-20	240	180	135	56	54	2442.36	0	2	15	7377.54		582.129	31.2934	1978-06-05	1860.23	0	0	0	0	0
1	1978-06-23	190	170	135	56	54	2442.36	0	2	18	7377.54		582.129	31.2934	1978-06-05	1860.23	0	0	0	0	0
1	1978-06-27	190	150	135	58	54	2531.98	0	2	22	7648.02		671.749	36.1111	1978-06-05	1860.23	0	0	0	0	0
1	1978-06-30	210	170	135	59	56	2669.44	0	2	25	8062.87		809.208	43.5004	1978-06-05	1860.23	0	0	0	0	0
1	1978-07-04	230	225	135	62	56	2810.53	5	2	29	8488.68		950.299	51.0851	1978-06-05	1860.23	0	0	0	5	0
1	1978-07-07	245	230	135	62	56	2810.53	100	2	32	8488.68		950.299	51.0851	1978-06-05	1860.23	0	0	0	20	80
1	1978-07-11	190	150	135	62	56	2810.53	100	3	36	8488.68		950.299	51.0851	1978-06-05	1860.23	0	0	0	20	80
1	1978-06-05	285	205	136	54	47	2059.05	0	1	0	6220.72		0	0	1978-06-05	2059.05	0	0	0	0	0
1	1978-06-09	215	180	136	58	47	2225.37	0	2	4	6722.68		166.323	8.07764	1978-06-05	2059.05	0	0	0	0	0
1	1978-06-13	215	155	136	60	49	2398.15	0	2	8	7244.13		339.104	16.469	1978-06-05	2059.05	0	0	0	0	0
1	1978-06-16	200	150	136	60	49	2398.15	100	2	11	7244.13		339.104	16.469	1978-06-05	2059.05	0	0	0	0	100
1	1978-06-20	240	180	136	60	49	2398.15	100	2	15	7244.13		339.104	16.469	1978-06-05	2059.05	0	0	40	0	60
1	1978-06-23	190	170	136	60	49	2398.15	100	2	18	7244.13		339.104	16.469	1978-06-05	2059.05	0	0	85	0	15
1	1978-06-27	190	150	136	60	49	2398.15	100	3	22	7244.13		339.104	16.469	1978-06-05	2059.05	0	0	85	0	15
1	1978-06-05	285	205	137	40	35	1135.39	0	1	0	3433.12		0	0	1978-06-05	1135.39	0	0	0	0	0
1	1978-06-09	215	180	137	44	39	1390.53	0	2	4	4203.12		255.136	22.4711	1978-06-05	1135.39	0	0	0	0	0
1	1978-06-13	215	155	137	48	43	1671.5	0	2	8	5051.1		536.108	47.2178	1978-06-05	1135.39	0	0	0	0	0
1	1978-06-16	200	150	137	48	43	1671.5	0	2	11	5051.1		536.108	47.2178	1978-06-05	1135.39	0	0	0	0	0
1	1978-06-20	240	180	137	48	43	1671.5	0	2	15	5051.1		536.108	47.2178	1978-06-05	1135.39	0	0	0	0	0
1	1978-06-23	190	170	137	48	43	1671.5	0	2	18	5051.1		536.108	47.2178	1978-06-05	1135.39	0	0	0	0	0
1	1978-06-27	190	150	137	48	43	1671.5	100	2	22	5051.1		536.108	47.2178	1978-06-05	1135.39	0	0	0	0	100
1	1978-06-30	210	170	137	48	43	1671.5	100	2	25	5051.1		536.108	47.2178	1978-06-05	1135.39	0	0	0	0	100
1	1978-07-04	230	225	137	48	43	1671.5	100	2	29	5051.1		536.108	47.2178	1978-06-05	1135.39	0	0	0	0	100
1	1978-07-07	245	230	137	48	43	1671.5	100	3	32	5051.1		536.108	47.2178	1978-06-05	1135.39	0	0	0	0	100
1	1978-06-05	285	205	138	43	37	1291.83	0	1	0	3905.24		0	0	1978-06-05	1291.83	0	0	0	0	0
1	1978-06-09	215	180	138	44	37	1324.32	0	2	4	4003.31		32.4975	2.51563	1978-06-05	1291.83	0	0	0	0	0
1	1978-06-13	215	155	138	45	38	1390.53	0	2	8	4203.12		98.7036	7.64062	1978-06-05	1291.83	0	0	0	0	0
1	1978-06-16	200	150	138	46	40	1492.87	0	2	11	4511.98		201.04	15.5625	1978-06-05	1291.83	0	0	0	0	0
1	1978-06-20	240	180	138	46	40	1492.87	0	2	15	4511.98		201.04	15.5625	1978-06-05	1291.83	0	0	0	0	0
1	1978-06-23	190	170	138	46	40	1492.87	0	2	18	4511.98		201.04	15.5625	1978-06-05	1291.83	0	0	0	0	0
1	1978-06-27	190	150	138	46	40	1492.87	0	2	22	4511.98		201.04	15.5625	1978-06-05	1291.83	0	0	0	0	0
1	1978-06-30	210	170	138	47	40	1527.79	0	2	25	4617.36		235.96	18.2656	1978-06-05	1291.83	0	0	0	0	0
1	1978-07-04	230	225	138	47	40	1527.79	100	2	29	4617.36		235.96	18.2656	1978-06-05	1291.83	0	0	0	0	100
1	1978-07-07	245	230	138	47	40	1527.79	100	3	32	4617.36		235.96	18.2656	1978-06-05	1291.83	0	0	0	0	100
1	1978-06-05	285	205	139	60	53	2577.39	0	1	0	7785.08		0	0	1978-06-05	2577.39	0	0	0	0	0
1	1978-06-09	215	180	139	60	56	2716.06	0	2	4	8203.59		138.669	5.38022	1978-06-05	2577.39	0	0	0	0	0
1	1978-06-13	215	155	139	60	56	2716.06	0	2	8	8203.59		138.669	5.38022	1978-06-05	2577.39	0	0	0	0	0
1	1978-06-16	200	150	139	60	56	2716.06	0	2	11	8203.59		138.669	5.38022	1978-06-05	2577.39	0	0	0	0	0
1	1978-06-20	240	180	139	60	56	2716.06	0	2	15	8203.59		138.669	5.38022	1978-06-05	2577.39	0	0	0	0	0
1	1978-06-23	190	170	139	64	57	2955.25	15	2	18	8925.46		377.859	14.6605	1978-06-05	2577.39	0	0	0	0	15
1	1978-06-27	190	150	139	64	57	2955.25	60	2	22	8925.46		377.859	14.6605	1978-06-05	2577.39	0	0	0	0	60
1	1978-06-30	210	170	139	66	58	3103.61	100	2	25	9373.21		526.217	20.4166	1978-06-05	2577.39	0	0	0	0	100
1	1978-07-04	230	225	139	66	58	3103.61	100	3	29	9373.21		526.217	20.4166	1978-06-05	2577.39	0	0	0	0	100
1	1978-06-05	285	205	140	61	56	2763.09	0	1	0	8345.53		0	0	1978-06-05	2763.09	0	0	0	0	0
1	1978-06-09	215	180	140	63	55	2810.53	0	2	4	8488.68		47.4342	1.71671	1978-06-05	2763.09	0	0	0	0	0
1	1978-06-13	215	155	140	65	55	2906.61	0	2	8	8778.65		143.514	5.19395	1978-06-05	2763.09	0	0	0	0	0
1	1978-06-16	200	150	140	65	55	2906.61	0	2	11	8778.65		143.514	5.19395	1978-06-05	2763.09	0	0	0	0	0
1	1978-06-20	240	180	140	65	57	3004.3	0	2	15	9073.49		241.208	8.72964	1978-06-05	2763.09	0	0	0	0	0
1	1978-06-23	190	170	140	66	58	3103.61	0	2	18	9373.21		340.517	12.3238	1978-06-05	2763.09	0	0	0	0	0
1	1978-06-27	190	150	140	66	58	3103.61	0	2	22	9373.21		340.517	12.3238	1978-06-05	2763.09	0	0	0	0	0
1	1978-06-30	210	170	140	66	58	3103.61	20	2	25	9373.21		340.517	12.3238	1978-06-05	2763.09	0	0	0	0	20
1	1978-07-04	230	225	140	66	58	3103.61	50	2	29	9373.21		340.517	12.3238	1978-06-05	2763.09	0	0	0	0	50
1	1978-07-07	245	230	140	66	58	3103.61	100	2	32	9373.21		340.517	12.3238	1978-06-05	2763.09	0	0	0	0	100
1	1978-07-11	190	150	140	66	58	3103.61	90	2	36	9373.21		340.517	12.3238	1978-06-05	2763.09	0	0	40	30	20
1	1978-07-14	250	155	140	66	58	3103.61	90	3	39	9373.21		340.517	12.3238	1978-06-05	2763.09	0	0	40	30	20
1	1978-06-05	285	205	141	50	43	1745.78	0	1	0	5275.27		0	0	1978-06-05	1745.78	0	0	0	0	0
1	1978-06-09	215	180	141	50	44	1783.53	0	2	4	5389.19		37.7455	2.1621	1978-06-05	1745.78	0	0	0	0	0
1	1978-06-13	215	155	141	51	45	1860.23	0	2	8	5620.68		114.448	6.55567	1978-06-05	1745.78	0	0	0	0	0
1	1978-06-16	200	150	141	52	45	1899.19	0	2	11	5738.25		153.404	8.78714	1978-06-05	1745.78	0	0	0	0	0
1	1978-06-20	240	180	141	53	45	1938.55	0	2	15	5857.04		192.765	11.0417	1978-06-05	1745.78	0	0	0	0	0
1	1978-06-23	190	170	141	53	45	1938.55	0	2	18	5857.04		192.765	11.0417	1978-06-05	1745.78	0	0	0	0	0
1	1978-06-27	190	150	141	53	45	1938.55	1	2	22	5857.04		192.765	11.0417	1978-06-05	1745.78	0	0	0	1	0
1	1978-06-30	210	170	141	54	46	2018.48	30	2	25	6098.27		272.696	15.6203	1978-06-05	1745.78	0	0	0	10	20
1	1978-07-04	230	225	141	54	46	2018.48	100	2	29	6098.27		272.696	15.6203	1978-06-05	1745.78	0	0	10	30	60
1	1978-07-07	245	230	141	54	46	2018.48	100	3	32	6098.27		272.696	15.6203	1978-06-05	1745.78	0	0	10	30	60
1	1978-06-05	285	205	142	63	54	2763.09	0	1	0	8345.53		0	0	1978-06-05	2763.09	0	0	0	0	0
1	1978-06-09	215	180	142	64	55	2858.37	0	2	4	8633.06		95.2722	3.44802	1978-06-05	2763.09	0	0	0	0	0
1	1978-06-13	215	155	142	64	55	2858.37	0	2	8	8633.06		95.2722	3.44802	1978-06-05	2763.09	0	0	0	0	0
1	1978-06-16	200	150	142	64	55	2858.37	0	2	11	8633.06		95.2722	3.44802	1978-06-05	2763.09	0	0	0	0	0
1	1978-06-20	240	180	142	64	55	2858.37	25	2	15	8633.06		95.2722	3.44802	1978-06-05	2763.09	0	0	0	0	25
1	1978-06-23	190	170	142	65	55	2906.61	50	2	18	8778.65		143.514	5.19395	1978-06-05	2763.09	0	0	10	0	40
1	1978-06-27	190	150	142	65	56	2955.25	50	2	22	8925.46		192.159	6.95449	1978-06-05	2763.09	0	0	30	0	20
1	1978-06-30	210	170	142	66	57	3053.76	80	2	25	9222.74		290.661	10.5194	1978-06-05	2763.09	0	0	75	0	5
1	1978-07-04	230	225	142	66	57	3053.76	80	3	29	9222.74		290.661	10.5194	1978-06-05	2763.09	0	0	75	0	5
1	1978-06-05	285	205	143	72	58	3411.23	0	1	0	10301.6		0	0	1978-06-05	3411.23	0	0	0	0	0
1	1978-06-09	215	180	143	72	58	3411.23	0	2	4	10301.6		0	0	1978-06-05	3411.23	0	0	0	0	0
1	1978-06-13	215	155	143	74	59	3570.49	0	2	8	10782.2		159.258	4.66864	1978-06-05	3411.23	0	0	0	0	0
1	1978-06-16	200	150	143	74	59	3570.49	30	2	11	10782.2		159.258	4.66864	1978-06-05	3411.23	0	0	0	0	30
1	1978-06-20	240	180	143	74	59	3570.49	100	2	15	10782.2		159.258	4.66864	1978-06-05	3411.23	0	0	0	0	100
1	1978-06-23	190	170	143	74	59	3570.49	100	2	18	10782.2		159.258	4.66864	1978-06-05	3411.23	0	0	0	0	100
1	1978-06-27	190	150	143	74	59	3570.49	100	2	22	10782.2		159.258	4.66864	1978-06-05	3411.23	0	0	5	0	95
1	1978-06-30	210	170	143	74	60	3624.38	100	2	25	10944.9		213.151	6.24852	1978-06-05	3411.23	0	0	5	0	95
1	1978-07-04	230	225	143	74	60	3624.38	100	2	29	10944.9		213.151	6.24852	1978-06-05	3411.23	0	0	40	0	60
1	1978-07-07	245	230	143	74	60	3624.38	100	3	32	10944.9		213.151	6.24852	1978-06-05	3411.23	0	0	40	0	60
1	1978-06-09	215	180	144	61	50	2486.97	0	1	0	7512.17		0	0	1978-06-09	2486.97	0	0	0	0	0
1	1978-06-13	215	155	144	64	52	2716.06	0	2	4	8203.59		229.097	9.21191	1978-06-09	2486.97	0	0	0	0	0
1	1978-06-16	200	150	144	65	52	2763.09	10	2	7	8345.53		276.128	11.103	1978-06-09	2486.97	0	0	0	0	10
1	1978-06-20	240	180	144	65	52	2763.09	10	2	11	8345.53		276.128	11.103	1978-06-09	2486.97	0	0	0	0	10
1	1978-06-23	190	170	144	65	52	2763.09	10	2	14	8345.53		276.128	11.103	1978-06-09	2486.97	0	0	0	0	10
1	1978-06-27	190	150	144	65	53	2810.53	15	2	18	8488.68		323.562	13.0103	1978-06-09	2486.97	0	0	0	0	15
1	1978-06-30	210	170	144	65	53	2810.53	30	2	21	8488.68		323.562	13.0103	1978-06-09	2486.97	0	0	0	0	30
1	1978-07-04	230	225	144	65	53	2810.53	80	2	25	8488.68		323.562	13.0103	1978-06-09	2486.97	0	0	40	0	40
1	1978-07-07	245	230	144	65	53	2810.53	90	2	28	8488.68		323.562	13.0103	1978-06-09	2486.97	0	0	40	10	40
1	1978-07-11	190	150	144	65	53	2810.53	100	2	32	8488.68		323.562	13.0103	1978-06-09	2486.97	0	0	50	40	10
1	1978-07-14	250	155	144	65	53	2810.53	100	3	35	8488.68		323.562	13.0103	1978-06-09	2486.97	0	0	50	40	10
1	1978-06-09	215	180	145	52	48	2018.48	0	1	0	6098.27		0	0	1978-06-09	2018.48	0	0	0	0	0
1	1978-06-13	215	155	145	59	50	2398.15	0	2	4	7244.13		379.676	18.81	1978-06-09	2018.48	0	0	0	0	0
1	1978-06-16	200	150	145	65	57	3004.3	0	2	7	9073.49		985.825	48.84	1978-06-09	2018.48	0	0	0	0	0
1	1978-06-20	240	180	145	65	57	3004.3	10	2	11	9073.49		985.825	48.84	1978-06-09	2018.48	0	0	0	0	10
1	1978-06-23	190	170	145	65	57	3004.3	40	2	14	9073.49		985.825	48.84	1978-06-09	2018.48	0	0	0	0	40
1	1978-06-27	190	150	145	67	58	3153.87	55	2	18	9524.89		1135.39	56.25	1978-06-09	2018.48	0	0	25	0	30
1	1978-06-30	210	170	145	67	58	3153.87	100	2	21	9524.89		1135.39	56.25	1978-06-09	2018.48	0	0	50	0	50
1	1978-07-04	230	225	145	67	58	3153.87	100	3	25	9524.89		1135.39	56.25	1978-06-09	2018.48	0	0	50	0	50
1	1978-06-09	215	180	146	52	44	1860.23	0	1	0	5620.68		0	0	1978-06-09	1860.23	0	0	0	0	0
1	1978-06-13	215	155	146	52	44	1860.23	0	2	4	5620.68		0	0	1978-06-09	1860.23	0	0	0	0	0
1	1978-06-16	200	150	146	56	49	2225.37	0	2	7	6722.68		365.143	19.6289	1978-06-09	1860.23	0	0	0	0	0
1	1978-06-20	240	180	146	57	50	2310.96	0	2	11	6980.97		450.726	24.2296	1978-06-09	1860.23	0	0	0	0	0
1	1978-06-23	190	170	146	57	50	2310.96	0	2	14	6980.97		450.726	24.2296	1978-06-09	1860.23	0	0	0	0	0
1	1978-06-27	190	150	146	58	51	2398.15	0	2	18	7244.13		537.924	28.9171	1978-06-09	1860.23	0	0	0	0	0
1	1978-06-30	210	170	146	60	54	2623.21	0	2	21	7923.37		762.985	41.0156	1978-06-09	1860.23	0	0	0	0	0
1	1978-07-04	230	225	146	60	54	2623.21	0	3	25	7923.37		762.985	41.0156	1978-06-09	1860.23	0	0	0	0	0
1	1978-06-09	215	180	147	57	47	2183.19	0	1	0	6595.36		0	0	1978-06-09	2183.19	0	0	0	0	0
1	1978-06-13	215	155	147	58	48	2267.96	0	2	4	6851.21		84.7761	3.88314	1978-06-09	2183.19	0	0	0	0	0
1	1978-06-16	200	150	147	59	48	2310.96	0	2	7	6980.97		127.77	5.85244	1978-06-09	2183.19	0	0	0	0	0
1	1978-06-20	240	180	147	59	48	2310.96	0	2	11	6980.97		127.77	5.85244	1978-06-09	2183.19	0	0	0	0	0
1	1978-06-23	190	170	147	59	48	2310.96	25	2	14	6980.97		127.77	5.85244	1978-06-09	2183.19	0	0	0	0	25
1	1978-06-27	190	150	147	59	48	2310.96	30	2	18	6980.97		127.77	5.85244	1978-06-09	2183.19	0	0	0	0	30
1	1978-06-30	210	170	147	59	48	2310.96	67	2	21	6980.97		127.77	5.85244	1978-06-09	2183.19	0	0	15	2	50
1	1978-07-04	230	225	147	59	48	2310.96	67	3	25	6980.97		127.77	5.85244	1978-06-09	2183.19	0	0	15	2	50
1	1978-06-09	215	180	148	47	45	1708.44	0	1	0	5162.58		0	0	1978-06-09	1708.44	0	0	0	0	0
1	1978-06-13	215	155	148	47	45	1708.44	0	2	4	5162.58		0	0	1978-06-09	1708.44	0	0	0	0	0
1	1978-06-16	200	150	148	47	45	1708.44	0	2	7	5162.58		0	0	1978-06-09	1708.44	0	0	0	0	0
1	1978-06-20	240	180	148	49	47	1860.23	0	2	11	5620.68		151.79	8.88469	1978-06-09	1708.44	0	0	0	0	0
1	1978-06-23	190	170	148	49	47	1860.23	0	2	14	5620.68		151.79	8.88469	1978-06-09	1708.44	0	0	0	0	0
1	1978-06-27	190	150	148	49	47	1860.23	0	2	18	5620.68		151.79	8.88469	1978-06-09	1708.44	0	0	0	0	0
1	1978-06-30	210	170	148	49	47	1860.23	0	2	21	5620.68		151.79	8.88469	1978-06-09	1708.44	0	0	0	0	0
1	1978-07-04	230	225	148	49	47	1860.23	100	2	25	5620.68		151.79	8.88469	1978-06-09	1708.44	0	0	0	1	99
1	1978-07-07	245	230	148	49	47	1860.23	100	2	28	5620.68		151.79	8.88469	1978-06-09	1708.44	0	0	0	1	99
1	1978-07-11	190	150	148	49	47	1860.23	100	3	32	5620.68		151.79	8.88469	1978-06-09	1708.44	0	0	0	1	99
1	1978-06-09	215	180	149	64	58	3004.3	0	1	0	9073.49		0	0	1978-06-09	3004.3	0	0	0	0	0
1	1978-06-13	215	155	149	66	59	3153.87	0	2	4	9524.89		149.569	4.9785	1978-06-09	3004.3	0	0	0	0	0
1	1978-06-16	200	150	149	67	59	3204.54	0	2	7	9677.79		200.233	6.66488	1978-06-09	3004.3	0	0	0	0	0
1	1978-06-20	240	180	149	67	59	3204.54	0	2	11	9677.79		200.233	6.66488	1978-06-09	3004.3	0	0	0	0	0
1	1978-06-23	190	170	149	67	60	3255.6	0	2	14	9831.92		251.301	8.36469	1978-06-09	3004.3	0	0	0	0	0
1	1978-06-27	190	150	149	67	60	3255.6	0	2	18	9831.92		251.301	8.36469	1978-06-09	3004.3	0	0	0	0	0
1	1978-06-30	210	170	149	67	60	3255.6	100	2	21	9831.92		251.301	8.36469	1978-06-09	3004.3	0	0	0	0	100
1	1978-07-04	230	225	149	67	60	3255.6	100	2	25	9831.92		251.301	8.36469	1978-06-09	3004.3	0	0	0	0	100
1	1978-07-07	245	230	149	67	60	3255.6	100	2	28	9831.92		251.301	8.36469	1978-06-09	3004.3	0	0	40	10	50
1	1978-07-11	190	150	149	67	60	3255.6	100	3	32	9831.92		251.301	8.36469	1978-06-09	3004.3	0	0	40	10	50
1	1978-06-09	215	180	150	43	40	1390.53	0	1	0	4203.12		0	0	1978-06-09	1390.53	0	0	0	0	0
1	1978-06-13	215	155	150	56	50	2267.96	0	2	4	6851.21		877.432	63.1006	1978-06-09	1390.53	0	0	0	0	0
1	1978-06-16	200	150	150	57	54	2486.97	0	2	7	7512.17		1096.44	78.8503	1978-06-09	1390.53	0	0	0	0	0
1	1978-06-20	240	180	150	57	54	2486.97	0	2	11	7512.17		1096.44	78.8503	1978-06-09	1390.53	0	0	0	0	0
1	1978-06-23	190	170	150	58	54	2531.98	0	2	14	7648.02		1141.45	82.0874	1978-06-09	1390.53	0	0	0	0	0
1	1978-06-27	190	150	150	59	55	2623.21	0	2	18	7923.37		1232.68	88.6486	1978-06-09	1390.53	0	0	0	0	0
1	1978-06-30	210	170	150	60	56	2716.06	20	2	21	8203.59		1325.53	95.3259	1978-06-09	1390.53	0	0	0	20	0
1	1978-07-04	230	225	150	60	57	2763.09	40	2	25	8345.53		1372.57	98.7081	1978-06-09	1390.53	0	0	0	30	10
1	1978-07-07	245	230	150	60	57	2763.09	90	2	28	8345.53		1372.57	98.7081	1978-06-09	1390.53	0	0	15	35	40
1	1978-07-11	190	150	150	60	57	2763.09	90	3	32	8345.53		1372.57	98.7081	1978-06-09	1390.53	0	0	15	35	40
1	1978-06-09	215	180	151	42	40	1357.22	0	1	0	4102.61		0	0	1978-06-09	1357.22	0	0	0	0	0
1	1978-06-13	215	155	151	53	49	2100.02	0	2	4	6344.38		742.8	54.7293	1978-06-09	1357.22	0	0	0	0	0
1	1978-06-16	200	150	151	54	50	2183.19	0	2	7	6595.36		825.961	60.8566	1978-06-09	1357.22	0	0	0	0	0
1	1978-06-20	240	180	151	54	51	2225.37	0	2	11	6722.68		868.147	63.9649	1978-06-09	1357.22	0	0	0	0	0
1	1978-06-23	190	170	151	55	51	2267.96	0	2	14	6851.21		910.737	67.1029	1978-06-09	1357.22	0	0	0	0	0
1	1978-06-27	190	150	151	55	51	2267.96	2	2	18	6851.21		910.737	67.1029	1978-06-09	1357.22	0	0	0	2	0
1	1978-06-30	210	170	151	56	51	2310.96	5	2	21	6980.97		953.731	70.2707	1978-06-09	1357.22	0	0	0	5	0
1	1978-07-04	230	225	151	56	51	2310.96	35	2	25	6980.97		953.731	70.2707	1978-06-09	1357.22	0	0	0	25	10
1	1978-07-07	245	230	151	56	51	2310.96	100	2	28	6980.97		953.731	70.2707	1978-06-09	1357.22	0	0	0	45	55
1	1978-07-11	190	150	151	56	51	2310.96	100	3	32	6980.97		953.731	70.2707	1978-06-09	1357.22	0	0	0	45	55
1	1978-06-09	215	180	152	44	40	1424.24	0	1	0	4304.86		0	0	1978-06-09	1424.24	0	0	0	0	0
1	1978-06-13	215	155	152	51	46	1899.19	0	2	4	5738.25		474.948	33.3475	1978-06-09	1424.24	0	0	0	0	0
1	1978-06-16	200	150	152	51	47	1938.55	0	2	7	5857.04		514.308	36.1111	1978-06-09	1424.24	0	0	0	0	0
1	1978-06-20	240	180	152	51	47	1938.55	0	2	11	5857.04		514.308	36.1111	1978-06-09	1424.24	0	0	0	0	0
1	1978-06-23	190	170	152	53	48	2059.05	0	2	14	6220.72		634.811	44.572	1978-06-09	1424.24	0	0	0	0	0
1	1978-06-27	190	150	152	53	49	2100.02	0	2	18	6344.38		675.786	47.449	1978-06-09	1424.24	0	0	0	0	0
1	1978-06-30	210	170	152	56	51	2310.96	5	2	21	6980.97		886.717	62.2591	1978-06-09	1424.24	0	0	0	5	0
1	1978-07-04	230	225	152	56	51	2310.96	100	2	25	6980.97		886.717	62.2591	1978-06-09	1424.24	0	0	0	15	85
1	1978-07-07	245	230	152	56	51	2310.96	100	2	28	6980.97		886.717	62.2591	1978-06-09	1424.24	0	0	0	40	60
1	1978-07-11	190	150	152	56	51	2310.96	100	3	32	6980.97		886.717	62.2591	1978-06-09	1424.24	0	0	0	40	60
1	1978-06-09	215	180	153	39	32	1017.51	0	1	0	3077.37		0	0	1978-06-09	1017.51	0	0	0	0	0
1	1978-06-13	215	155	153	42	36	1228.04	0	2	4	3712.74		210.527	20.6903	1978-06-09	1017.51	0	0	0	0	0
1	1978-06-16	200	150	153	44	39	1390.53	0	2	7	4203.12		373.015	36.6594	1978-06-09	1017.51	0	0	0	0	0
1	1978-06-20	240	180	153	44	39	1390.53	0	2	11	4203.12		373.015	36.6594	1978-06-09	1017.51	0	0	0	0	0
1	1978-06-23	190	170	153	44	39	1390.53	0	2	14	4203.12		373.015	36.6594	1978-06-09	1017.51	0	0	0	0	0
1	1978-06-27	190	150	153	44	40	1424.24	0	2	18	4304.86		406.723	39.9722	1978-06-09	1017.51	0	0	0	0	0
1	1978-06-30	210	170	153	44	40	1424.24	0	3	21	4304.86		406.723	39.9722	1978-06-09	1017.51	0	0	0	0	0
1	1978-06-09	215	180	154	47	45	1708.44	0	1	0	5162.58		0	0	1978-06-09	1708.44	0	0	0	0	0
1	1978-06-13	215	155	154	47	45	1708.44	0	2	4	5162.58		0	0	1978-06-09	1708.44	0	0	0	0	0
1	1978-06-16	200	150	154	48	48	1860.23	0	2	7	5620.68		151.79	8.88469	1978-06-09	1708.44	0	0	0	0	0
1	1978-06-20	240	180	154	48	48	1860.23	0	2	11	5620.68		151.79	8.88469	1978-06-09	1708.44	0	0	0	0	0
1	1978-06-23	190	170	154	48	48	1860.23	0	2	14	5620.68		151.79	8.88469	1978-06-09	1708.44	0	0	0	0	0
1	1978-06-27	190	150	154	48	48	1860.23	0	2	18	5620.68		151.79	8.88469	1978-06-09	1708.44	0	0	0	0	0
1	1978-06-30	210	170	154	48	48	1860.23	0	2	21	5620.68		151.79	8.88469	1978-06-09	1708.44	0	0	0	0	0
1	1978-07-04	230	225	154	48	48	1860.23	0	2	25	5620.68		151.79	8.88469	1978-06-09	1708.44	0	0	0	0	0
1	1978-07-07	245	230	154	48	48	1860.23	100	2	28	5620.68		151.79	8.88469	1978-06-09	1708.44	0	0	0	1	99
1	1978-07-11	190	150	154	48	48	1860.23	100	2	32	5620.68		151.79	8.88469	1978-06-09	1708.44	0	0	0	20	80
1	1978-07-14	250	155	154	48	48	1860.23	100	2	35	5620.68		151.79	8.88469	1978-06-09	1708.44	0	0	0	80	20
1	1978-07-18	255	160	154	48	48	1860.23	100	3	39	5620.68		151.79	8.88469	1978-06-09	1708.44	0	0	0	80	20
1	1978-06-09	215	180	155	53	46	1978.31	0	1	0	5977.05		0	0	1978-06-09	1978.31	0	0	0	0	0
1	1978-06-13	215	155	155	68	53	2955.25	0	2	4	8925.46		976.943	49.3827	1978-06-09	1978.31	0	0	0	0	0
1	1978-06-16	200	150	155	69	54	3053.76	0	2	7	9222.74		1075.45	54.3618	1978-06-09	1978.31	0	0	0	0	0
1	1978-06-20	240	180	155	71	56	3255.6	0	2	11	9831.92		1277.29	64.5648	1978-06-09	1978.31	0	0	0	0	0
1	1978-06-23	190	170	155	71	57	3307.07	0	2	14	9987.26		1328.76	67.1666	1978-06-09	1978.31	0	0	0	0	0
1	1978-06-27	190	150	155	71	58	3358.95	0	2	18	10143.8		1380.64	69.7888	1978-06-09	1978.31	0	0	0	0	0
1	1978-06-30	210	170	155	72	57	3358.95	0	2	21	10143.8		1380.64	69.7888	1978-06-09	1978.31	0	0	0	0	0
1	1978-07-04	230	225	155	72	58	3411.23	0	2	25	10301.6		1432.92	72.4314	1978-06-09	1978.31	0	0	0	0	0
1	1978-07-07	245	230	155	72	58	3411.23	10	2	28	10301.6		1432.92	72.4314	1978-06-09	1978.31	0	0	0	0	10
1	1978-07-11	190	150	155	72	58	3411.23	40	2	32	10301.6		1432.92	72.4314	1978-06-09	1978.31	0	0	0	20	20
1	1978-07-14	250	155	155	72	58	3411.23	100	2	35	10301.6		1432.92	72.4314	1978-06-09	1978.31	0	0	50	40	10
1	1978-07-18	255	160	155	72	58	3411.23	100	3	39	10301.6		1432.92	72.4314	1978-06-09	1978.31	0	0	50	40	10
1	1978-06-09	215	180	156	40	37	1196.76	0	1	0	3618.31		0	0	1978-06-09	1196.76	0	0	0	0	0
1	1978-06-13	215	155	156	48	40	1563.11	0	2	4	4723.97		366.354	30.6122	1978-06-09	1196.76	0	0	0	0	0
1	1978-06-16	200	150	156	51	42	1745.78	0	2	7	5275.27		549.026	45.8762	1978-06-09	1196.76	0	0	0	0	0
1	1978-06-20	240	180	156	51	42	1745.78	0	2	11	5275.27		549.026	45.8762	1978-06-09	1196.76	0	0	0	0	0
1	1978-06-23	190	170	156	54	45	1978.31	0	2	14	5977.05		781.555	65.3061	1978-06-09	1196.76	0	0	0	0	0
1	1978-06-27	190	150	156	55	48	2141.4	0	2	18	6469.26		944.648	78.9341	1978-06-09	1196.76	0	0	0	0	0
1	1978-06-30	210	170	156	56	50	2267.96	0	2	21	6851.21		1071.21	89.5092	1978-06-09	1196.76	0	0	0	0	0
1	1978-07-04	230	225	156	56	50	2267.96	100	2	25	6851.21		1071.21	89.5092	1978-06-09	1196.76	0	0	0	1	99
1	1978-07-07	245	230	156	56	50	2267.96	100	2	28	6851.21		1071.21	89.5092	1978-06-09	1196.76	0	0	5	20	75
1	1978-07-11	190	150	156	56	50	2267.96	100	2	32	6851.21		1071.21	89.5092	1978-06-09	1196.76	0	0	10	65	25
1	1978-07-14	250	155	156	56	50	2267.96	100	3	35	6851.21		1071.21	89.5092	1978-06-09	1196.76	0	0	10	65	25
1	1978-06-13	215	155	157	56	47	2141.4	0	1	0	6469.26		0	0	1978-06-13	2141.4	0	0	0	0	0
1	1978-06-16	200	150	157	62	52	2623.21	0	2	3	7923.37		481.811	22.4998	1978-06-13	2141.4	0	0	0	0	0
1	1978-06-20	240	180	157	62	53	2669.44	0	2	7	8062.87		528.034	24.6583	1978-06-13	2141.4	0	0	0	0	0
1	1978-06-23	190	170	157	63	53	2716.06	0	2	10	8203.59		574.661	26.8357	1978-06-13	2141.4	0	0	0	0	0
1	1978-06-27	190	150	157	63	53	2716.06	0	2	14	8203.59		574.661	26.8357	1978-06-13	2141.4	0	0	0	0	0
1	1978-06-30	210	170	157	63	54	2763.09	0	2	17	8345.53		621.691	29.032	1978-06-13	2141.4	0	0	0	0	0
1	1978-07-04	230	225	157	63	54	2763.09	20	2	21	8345.53		621.691	29.032	1978-06-13	2141.4	0	0	0	0	20
1	1978-07-07	245	230	157	63	55	2810.53	100	2	24	8488.68		669.125	31.2471	1978-06-13	2141.4	0	0	0	2	98
1	1978-07-11	190	150	157	63	55	2810.53	100	3	28	8488.68		669.125	31.2471	1978-06-13	2141.4	0	0	0	2	98
1	1978-06-13	215	155	158	49	47	1860.23	0	1	0	5620.68		0	0	1978-06-13	1860.23	0	0	0	0	0
1	1978-06-16	200	150	158	54	50	2183.19	0	2	3	6595.36		322.956	17.3611	1978-06-13	1860.23	0	0	0	0	0
1	1978-06-20	240	180	158	55	50	2225.37	0	2	7	6722.68		365.143	19.6289	1978-06-13	1860.23	0	0	0	0	0
1	1978-06-23	190	170	158	55	50	2225.37	0	2	10	6722.68		365.143	19.6289	1978-06-13	1860.23	0	0	0	0	0
1	1978-06-27	190	150	158	55	50	2225.37	0	2	14	6722.68		365.143	19.6289	1978-06-13	1860.23	0	0	0	0	0
1	1978-06-30	210	170	158	55	50	2225.37	0	2	17	6722.68		365.143	19.6289	1978-06-13	1860.23	0	0	0	0	0
1	1978-07-04	230	225	158	55	50	2225.37	100	2	21	6722.68		365.143	19.6289	1978-06-13	1860.23	0	0	0	1	99
1	1978-07-07	245	230	158	56	52	2354.35	100	2	24	7111.94		494.123	26.5625	1978-06-13	1860.23	0	0	0	15	85
1	1978-07-11	190	150	158	56	52	2354.35	100	3	28	7111.94		494.123	26.5625	1978-06-13	1860.23	0	0	0	15	85
1	1978-06-13	215	155	159	47	44	1671.5	0	1	0	5051.1		0	0	1978-06-13	1671.5	0	0	0	0	0
1	1978-06-16	200	150	159	55	53	2354.35	0	2	3	7111.94		682.851	40.8526	1978-06-13	1671.5	0	0	0	0	0
1	1978-06-20	240	180	159	60	57	2763.09	0	2	7	8345.53		1091.59	65.3061	1978-06-13	1671.5	0	0	0	0	0
1	1978-06-23	190	170	159	60	57	2763.09	0	2	10	8345.53		1091.59	65.3061	1978-06-13	1671.5	0	0	0	0	0
1	1978-06-27	190	150	159	61	57	2810.53	0	2	14	8488.68		1139.03	68.1439	1978-06-13	1671.5	0	0	0	0	0
1	1978-06-30	210	170	159	61	58	2858.37	0	2	17	8633.06		1186.87	71.0059	1978-06-13	1671.5	0	0	0	0	0
1	1978-07-04	230	225	159	63	58	2955.25	0	2	21	8925.46		1283.75	76.8023	1978-06-13	1671.5	0	0	0	0	0
1	1978-07-07	245	230	159	63	58	2955.25	20	2	24	8925.46		1283.75	76.8023	1978-06-13	1671.5	0	0	0	20	0
1	1978-07-11	190	150	159	63	58	2955.25	100	2	28	8925.46		1283.75	76.8023	1978-06-13	1671.5	0	0	0	30	70
1	1978-07-14	250	155	159	63	58	2955.25	100	3	31	8925.46		1283.75	76.8023	1978-06-13	1671.5	0	0	0	30	70
1	1978-06-13	215	155	160	55	48	2141.4	0	1	0	6469.26		0	0	1978-06-13	2141.4	0	0	0	0	0
1	1978-06-16	200	150	160	57	50	2310.96	0	2	3	6980.97		169.552	7.91781	1978-06-13	2141.4	0	0	0	0	0
1	1978-06-20	240	180	160	59	50	2398.15	0	2	7	7244.13		256.75	11.9898	1978-06-13	2141.4	0	0	0	0	0
1	1978-06-23	190	170	160	59	50	2398.15	0	2	10	7244.13		256.75	11.9898	1978-06-13	2141.4	0	0	0	0	0
1	1978-06-27	190	150	160	60	51	2486.97	1	2	14	7512.17		345.563	16.1372	1978-06-13	2141.4	0	0	0	1	0
1	1978-06-30	210	170	160	60	51	2486.97	0	2	17	7512.17		345.563	16.1372	1978-06-13	2141.4	0	0	0	0	0
1	1978-07-04	230	225	160	60	52	2531.98	0	2	21	7648.02		390.575	18.2392	1978-06-13	2141.4	0	0	0	0	0
1	1978-07-07	245	230	160	60	53	2577.39	100	2	24	7785.08		435.991	20.3601	1978-06-13	2141.4	0	0	0	5	95
1	1978-07-11	190	150	160	60	53	2577.39	100	2	28	7785.08		435.991	20.3601	1978-06-13	2141.4	0	0	0	40	60
1	1978-07-14	250	155	160	60	53	2577.39	100	2	31	7785.08		435.991	20.3601	1978-06-13	2141.4	0	0	0	80	20
1	1978-07-18	255	160	160	60	53	2577.39	100	3	35	7785.08		435.991	20.3601	1978-06-13	2141.4	0	0	0	80	20
1	1978-06-13	215	155	161	68	60	3307.07	0	1	0	9987.26		0	0	1978-06-13	3307.07	0	0	0	0	0
1	1978-06-16	200	150	161	73	64	3788.48	0	2	3	11440.1		481.407	14.5569	1978-06-13	3307.07	0	0	0	0	0
1	1978-06-20	240	180	161	74	64	3843.99	0	2	7	11607.7		536.915	16.2354	1978-06-13	3307.07	0	0	0	0	0
1	1978-06-23	190	170	161	74	64	3843.99	0	2	10	11607.7		536.915	16.2354	1978-06-13	3307.07	0	0	0	0	0
1	1978-06-27	190	150	161	74	64	3843.99	0	2	14	11607.7		536.915	16.2354	1978-06-13	3307.07	0	0	0	0	0
1	1978-06-30	210	170	161	74	65	3899.9	25	2	17	11776.4		592.827	17.926	1978-06-13	3307.07	0	0	0	5	20
1	1978-07-04	230	225	161	77	66	4127.59	90	2	21	12463.6		820.511	24.8108	1978-06-13	3307.07	0	0	25	15	50
1	1978-07-07	245	230	161	77	66	4127.59	100	2	24	12463.6		820.511	24.8108	1978-06-13	3307.07	0	0	40	40	20
1	1978-07-11	190	150	161	77	66	4127.59	100	3	28	12463.6		820.511	24.8108	1978-06-13	3307.07	0	0	40	40	20
1	1978-06-13	215	155	162	54	59	2577.39	0	1	0	7785.08		0	0	1978-06-13	2577.39	0	0	0	0	0
1	1978-06-16	200	150	162	65	60	3153.87	0	2	3	9524.89		576.477	22.3667	1978-06-13	2577.39	0	0	0	0	0
1	1978-06-20	240	180	162	67	62	3358.95	0	2	7	10143.8		781.555	30.3234	1978-06-13	2577.39	0	0	0	0	0
1	1978-06-23	190	170	162	68	63	3463.91	0	2	10	10460.6		886.516	34.3958	1978-06-13	2577.39	0	0	0	0	0
1	1978-06-27	190	150	162	68	65	3570.49	0	2	14	10782.2		993.091	38.5308	1978-06-13	2577.39	0	0	0	0	0
1	1978-06-30	210	170	162	69	66	3678.68	1	2	17	11108.8		1101.28	42.7285	1978-06-13	2577.39	0	0	0	1	0
1	1978-07-04	230	225	162	71	66	3788.48	10	2	21	11440.1		1211.09	46.9888	1978-06-13	2577.39	0	0	0	10	0
1	1978-07-07	245	230	162	71	66	3788.48	100	2	24	11440.1		1211.09	46.9888	1978-06-13	2577.39	0	0	0	25	75
1	1978-07-11	190	150	162	71	66	3788.48	100	2	28	11440.1		1211.09	46.9888	1978-06-13	2577.39	0	0	0	85	15
1	1978-07-14	250	155	162	71	66	3788.48	100	3	31	11440.1		1211.09	46.9888	1978-06-13	2577.39	0	0	0	85	15
1	1978-06-13	215	155	163	55	49	2183.19	0	1	0	6595.36		0	0	1978-06-13	2183.19	0	0	0	0	0
1	1978-06-16	200	150	163	58	53	2486.97	0	2	3	7512.17		303.781	13.9146	1978-06-13	2183.19	0	0	0	0	0
1	1978-06-20	240	180	163	59	54	2577.39	0	2	7	7785.08		394.209	18.0566	1978-06-13	2183.19	0	0	0	0	0
1	1978-06-23	190	170	163	60	54	2623.21	0	2	10	7923.37		440.028	20.1553	1978-06-13	2183.19	0	0	0	0	0
1	1978-06-27	190	150	163	60	54	2623.21	0	2	14	7923.37		440.028	20.1553	1978-06-13	2183.19	0	0	0	0	0
1	1978-06-30	210	170	163	60	54	2623.21	3	2	17	7923.37		440.028	20.1553	1978-06-13	2183.19	0	0	0	1	2
1	1978-07-04	230	225	163	60	54	2623.21	25	2	21	7923.37		440.028	20.1553	1978-06-13	2183.19	0	0	0	5	20
1	1978-07-07	245	230	163	60	54	2623.21	100	2	24	7923.37		440.028	20.1553	1978-06-13	2183.19	0	0	25	6	69
1	1978-07-11	190	150	163	60	54	2623.21	100	3	28	7923.37		440.028	20.1553	1978-06-13	2183.19	0	0	25	6	69
1	1978-06-13	215	155	164	51	49	2018.48	0	1	0	6098.27		0	0	1978-06-13	2018.48	0	0	0	0	0
1	1978-06-16	200	150	164	52	49	2059.05	0	2	3	6220.72		40.5714	2.01	1978-06-13	2018.48	0	0	0	0	0
1	1978-06-20	240	180	164	53	50	2141.4	0	2	7	6469.26		122.925	6.09	1978-06-13	2018.48	0	0	0	0	0
1	1978-06-23	190	170	164	53	50	2141.4	0	2	10	6469.26		122.925	6.09	1978-06-13	2018.48	0	0	0	0	0
1	1978-06-27	190	150	164	53	50	2141.4	0	2	14	6469.26		122.925	6.09	1978-06-13	2018.48	0	0	0	0	0
1	1978-06-30	210	170	164	53	50	2141.4	100	2	17	6469.26		122.925	6.09	1978-06-13	2018.48	0	0	0	0	100
1	1978-07-04	230	225	164	53	50	2141.4	100	2	21	6469.26		122.925	6.09	1978-06-13	2018.48	0	0	90	0	10
1	1978-07-07	245	230	164	53	50	2141.4	100	3	24	6469.26		122.925	6.09	1978-06-13	2018.48	0	0	90	0	10
1	1978-06-13	215	155	165	47	40	1527.79	0	1	0	4617.36		0	0	1978-06-13	1527.79	0	0	0	0	0
1	1978-06-16	200	150	165	49	41	1634.97	0	2	3	4940.84		107.181	7.01546	1978-06-13	1527.79	0	0	0	0	0
1	1978-06-20	240	180	165	51	42	1745.78	0	2	7	5275.27		217.996	14.2687	1978-06-13	1527.79	0	0	0	0	0
1	1978-06-23	190	170	165	51	42	1745.78	0	2	10	5275.27		217.996	14.2687	1978-06-13	1527.79	0	0	0	0	0
1	1978-06-27	190	150	165	51	42	1745.78	1	2	14	5275.27		217.996	14.2687	1978-06-13	1527.79	0	0	0	1	0
1	1978-06-30	210	170	165	51	43	1783.53	25	2	17	5389.19		255.741	16.7393	1978-06-13	1527.79	0	0	0	10	15
1	1978-07-04	230	225	165	51	43	1783.53	75	2	21	5389.19		255.741	16.7393	1978-06-13	1527.79	0	0	15	20	40
1	1978-07-07	245	230	165	51	43	1783.53	75	3	24	5389.19		255.741	16.7393	1978-06-13	1527.79	0	0	15	20	40
1	1978-06-13	215	155	166	49	42	1671.5	0	1	0	5051.1		0	0	1978-06-13	1671.5	0	0	0	0	0
1	1978-06-16	200	150	166	51	44	1821.68	0	2	3	5504.33		150.175	8.98442	1978-06-13	1671.5	0	0	0	0	0
1	1978-06-20	240	180	166	55	46	2059.05	0	2	7	6220.72		387.548	23.1856	1978-06-13	1671.5	0	0	0	0	0
1	1978-06-23	190	170	166	59	48	2310.96	0	2	10	6980.97		639.454	38.2562	1978-06-13	1671.5	0	0	0	0	0
1	1978-06-27	190	150	166	61	49	2442.36	0	2	14	7377.54		770.857	46.1176	1978-06-13	1671.5	0	0	0	0	0
1	1978-06-30	210	170	166	61	50	2486.97	20	2	17	7512.17		815.465	48.7864	1978-06-13	1671.5	0	0	0	0	20
1	1978-07-04	230	225	166	61	50	2486.97	100	2	21	7512.17		815.465	48.7864	1978-06-13	1671.5	0	0	0	0	100
1	1978-07-07	245	230	166	62	50	2531.98	100	2	24	7648.02		860.477	51.4793	1978-06-13	1671.5	0	0	0	0	100
1	1978-07-11	190	150	166	62	50	2531.98	100	2	28	7648.02		860.477	51.4793	1978-06-13	1671.5	0	0	10	5	85
1	1978-07-14	250	155	166	62	50	2531.98	100	2	31	7648.02		860.477	51.4793	1978-06-13	1671.5	0	0	30	20	50
1	1978-07-18	255	160	166	62	50	2531.98	100	3	35	7648.02		860.477	51.4793	1978-06-13	1671.5	0	0	30	20	50
1	1978-06-13	215	155	167	26	24	504.62	0	1	0	1529.45		0	0	1978-06-13	504.62	0	0	0	0	0
1	1978-06-16	200	150	167	26	25	525.006	0	2	3	1590.97		20.3866	4.04	1978-06-13	504.62	0	0	0	0	0
1	1978-06-20	240	180	167	30	27	655.804	0	2	7	1985.72		151.184	29.96	1978-06-13	504.62	0	0	0	0	0
1	1978-06-23	190	170	167	33	30	801.134	0	2	10	2424.33		296.514	58.76	1978-06-13	504.62	0	0	0	0	0
1	1978-06-27	190	150	167	34	33	906.095	0	2	14	2741.1		401.475	79.56	1978-06-13	504.62	0	0	0	0	0
1	1978-06-30	210	170	167	34	33	906.095	60	2	17	2741.1		401.475	79.56	1978-06-13	504.62	0	0	0	0	60
1	1978-07-04	230	225	167	35	33	933.344	100	2	21	2823.34		428.725	84.96	1978-06-13	504.62	0	0	0	0	100
1	1978-07-07	245	230	167	35	34	960.997	100	2	24	2906.8		456.378	90.44	1978-06-13	504.62	0	0	1	0	99
1	1978-07-11	190	150	167	35	34	960.997	100	2	28	2906.8		456.378	90.44	1978-06-13	504.62	0	0	40	0	60
1	1978-07-14	250	155	167	35	34	960.997	100	3	31	2906.8		456.378	90.44	1978-06-13	504.62	0	0	40	0	60
1	1978-06-13	215	155	168	62	54	2716.06	0	1	0	8203.59		0	0	1978-06-13	2716.06	0	0	0	0	0
1	1978-06-16	200	150	168	62	55	2763.09	0	2	3	8345.53		47.0305	1.73157	1978-06-13	2716.06	0	0	0	0	0
1	1978-06-20	240	180	168	62	56	2810.53	0	2	7	8488.68		94.4648	3.478	1978-06-13	2716.06	0	0	0	0	0
1	1978-06-23	190	170	168	62	57	2858.37	0	2	10	8633.06		142.303	5.2393	1978-06-13	2716.06	0	0	0	0	0
1	1978-06-27	190	150	168	62	57	2858.37	0	2	14	8633.06		142.303	5.2393	1978-06-13	2716.06	0	0	0	0	0
1	1978-06-30	210	170	168	62	57	2858.37	0	2	17	8633.06		142.303	5.2393	1978-06-13	2716.06	0	0	0	0	0
1	1978-07-04	230	225	168	62	57	2858.37	75	2	21	8633.06		142.303	5.2393	1978-06-13	2716.06	0	0	0	0	75
1	1978-07-07	245	230	168	62	57	2858.37	81	2	24	8633.06		142.303	5.2393	1978-06-13	2716.06	0	0	0	1	80
1	1978-07-11	190	150	168	62	57	2858.37	81	3	28	8633.06		142.303	5.2393	1978-06-13	2716.06	0	0	0	1	80
1	1978-06-16	200	150	169	52	52	2183.19	0	1	0	6595.36		0	0	1978-06-16	2183.19	0	0	0	0	0
1	1978-06-20	240	180	169	57	54	2486.97	0	2	4	7512.17		303.781	13.9146	1978-06-16	2183.19	0	0	0	0	0
1	1978-06-23	190	170	169	61	59	2906.61	0	2	7	8778.65		723.423	33.1361	1978-06-16	2183.19	0	0	0	0	0
1	1978-06-27	190	150	169	64	60	3103.61	0	2	11	9373.21		920.426	42.1598	1978-06-16	2183.19	0	0	0	0	0
1	1978-06-30	210	170	169	66	63	3358.95	1	2	14	10143.8		1175.76	53.8554	1978-06-16	2183.19	0	0	0	1	0
1	1978-07-04	230	225	169	66	63	3358.95	5	2	18	10143.8		1175.76	53.8554	1978-06-16	2183.19	0	0	0	5	0
1	1978-07-07	245	230	169	68	63	3463.91	15	2	21	10460.6		1280.72	58.6631	1978-06-16	2183.19	0	0	0	15	0
1	1978-07-11	190	150	169	68	64	3517	100	2	25	10620.8		1333.81	61.0947	1978-06-16	2183.19	0	0	0	30	70
1	1978-07-14	250	155	169	68	64	3517	100	2	28	10620.8		1333.81	61.0947	1978-06-16	2183.19	0	0	0	50	50
1	1978-07-18	255	160	169	68	64	3517	100	3	32	10620.8		1333.81	61.0947	1978-06-16	2183.19	0	0	0	50	50
1	1978-06-16	200	150	170	50	45	1821.68	0	1	0	5504.33		0	0	1978-06-16	1821.68	0	0	0	0	0
1	1978-06-20	240	180	170	55	49	2183.19	0	2	4	6595.36		361.509	19.8449	1978-06-16	1821.68	0	0	0	0	0
1	1978-06-23	190	170	170	56	49	2225.37	0	2	7	6722.68		403.696	22.1607	1978-06-16	1821.68	0	0	0	0	0
1	1978-06-27	190	150	170	56	50	2267.96	0	2	11	6851.21		446.285	24.4986	1978-06-16	1821.68	0	0	0	0	0
1	1978-06-30	210	170	170	57	51	2354.35	0	2	14	7111.94		532.676	29.241	1978-06-16	1821.68	0	0	0	0	0
1	1978-07-04	230	225	170	57	51	2354.35	100	2	18	7111.94		532.676	29.241	1978-06-16	1821.68	0	0	0	5	95
1	1978-07-07	245	230	170	57	51	2354.35	100	2	21	7111.94		532.676	29.241	1978-06-16	1821.68	0	0	0	15	85
1	1978-07-11	190	150	170	57	51	2354.35	100	2	25	7111.94		532.676	29.241	1978-06-16	1821.68	0	0	0	30	70
1	1978-07-14	250	155	170	57	51	2354.35	100	3	28	7111.94		532.676	29.241	1978-06-16	1821.68	0	0	0	30	70
1	1978-06-16	200	150	171	53	45	1938.55	0	1	0	5857.04		0	0	1978-06-16	1938.55	0	0	0	0	0
1	1978-06-20	240	180	171	59	42	2059.05	0	2	4	6220.72		120.503	6.21616	1978-06-16	1938.55	0	0	0	0	0
1	1978-06-23	190	170	171	61	49	2442.36	0	2	7	7377.54		503.812	25.9892	1978-06-16	1938.55	0	0	0	0	0
1	1978-06-27	190	150	171	63	51	2623.21	0	2	11	7923.37		684.668	35.3186	1978-06-16	1938.55	0	0	0	0	0
1	1978-06-30	210	170	171	63	53	2716.06	0	2	14	8203.59		777.518	40.1083	1978-06-16	1938.55	0	0	0	0	0
1	1978-07-04	230	225	171	64	54	2810.53	0	2	18	8488.68		871.982	44.9813	1978-06-16	1938.55	0	0	0	0	0
1	1978-07-07	245	230	171	64	56	2906.61	100	2	21	8778.65		968.062	49.9375	1978-06-16	1938.55	0	0	0	15	85
1	1978-07-11	190	150	171	64	56	2906.61	100	3	25	8778.65		968.062	49.9375	1978-06-16	1938.55	0	0	0	15	85
1	1978-06-16	200	150	172	46	42	1563.11	0	1	0	4723.97		0	0	1978-06-16	1563.11	0	0	0	0	0
1	1978-06-20	240	180	172	50	46	1860.23	0	2	4	5620.68		297.12	19.0083	1978-06-16	1563.11	0	0	0	0	0
1	1978-06-23	190	170	172	54	49	2141.4	0	2	7	6469.26		578.294	36.9964	1978-06-16	1563.11	0	0	0	0	0
1	1978-06-27	190	150	172	57	52	2398.15	0	2	11	7244.13		835.044	53.422	1978-06-16	1563.11	0	0	0	0	0
1	1978-06-30	210	170	172	59	51	2442.36	0	2	14	7377.54		879.249	56.25	1978-06-16	1563.11	0	0	0	0	0
1	1978-07-04	230	225	172	61	52	2577.39	1	2	18	7785.08		1014.29	64.8889	1978-06-16	1563.11	0	0	0	1	0
1	1978-07-07	245	230	172	61	52	2577.39	25	2	21	7785.08		1014.29	64.8889	1978-06-16	1563.11	0	0	0	25	0
1	1978-07-11	190	150	172	61	52	2577.39	65	2	25	7785.08		1014.29	64.8889	1978-06-16	1563.11	0	0	0	50	15
1	1978-07-14	250	155	172	61	52	2577.39	65	3	28	7785.08		1014.29	64.8889	1978-06-16	1563.11	0	0	0	50	15
1	1978-06-16	200	150	173	53	49	2100.02	0	1	0	6344.38		0	0	1978-06-16	2100.02	0	0	0	0	0
1	1978-06-20	240	180	173	58	51	2398.15	0	2	4	7244.13		298.129	14.1965	1978-06-16	2100.02	0	0	0	0	0
1	1978-06-23	190	170	173	59	53	2531.98	0	2	7	7648.02		431.954	20.569	1978-06-16	2100.02	0	0	0	0	0
1	1978-06-27	190	150	173	59	53	2531.98	0	2	11	7648.02		431.954	20.569	1978-06-16	2100.02	0	0	0	0	0
1	1978-06-30	210	170	173	60	54	2623.21	0	2	14	7923.37		523.189	24.9135	1978-06-16	2100.02	0	0	0	0	0
1	1978-07-04	230	225	173	60	55	2669.44	0	2	18	8062.87		569.413	27.1146	1978-06-16	2100.02	0	0	0	0	0
1	1978-07-07	245	230	173	61	55	2716.06	1	2	21	8203.59		616.039	29.3349	1978-06-16	2100.02	0	0	0	1	0
1	1978-07-11	190	150	173	61	55	2716.06	100	2	25	8203.59		616.039	29.3349	1978-06-16	2100.02	0	0	0	15	85
1	1978-07-14	250	155	173	61	55	2716.06	100	2	28	8203.59		616.039	29.3349	1978-06-16	2100.02	0	0	0	40	60
1	1978-07-18	255	160	173	61	55	2716.06	100	2	32	8203.59		616.039	29.3349	1978-06-16	2100.02	0	0	45	45	10
1	1978-07-24	270	170	173	61	55	2716.06	100	3	38	8203.59		616.039	29.3349	1978-06-16	2100.02	0	0	45	45	10
1	1978-06-16	200	150	174	41	35	1165.87	0	1	0	3525.11		0	0	1978-06-16	1165.87	0	0	0	0	0
1	1978-06-20	240	180	174	47	39	1492.87	0	2	4	4511.98		326.993	28.0471	1978-06-16	1165.87	0	0	0	0	0
1	1978-06-23	190	170	174	51	42	1745.78	0	2	7	5275.27		579.909	49.7403	1978-06-16	1165.87	0	0	0	0	0
1	1978-06-27	190	150	174	53	43	1860.23	0	2	11	5620.68		694.356	59.5568	1978-06-16	1165.87	0	0	0	0	0
1	1978-06-30	210	170	174	53	46	1978.31	0	2	14	5977.05		812.437	69.6849	1978-06-16	1165.87	0	0	0	0	0
1	1978-07-04	230	225	174	55	46	2059.05	0	2	18	6220.72		893.177	76.6101	1978-06-16	1165.87	0	0	0	0	0
1	1978-07-07	245	230	174	54	46	2018.48	2	2	21	6098.27		852.605	73.1302	1978-06-16	1165.87	0	0	0	2	0
1	1978-07-11	190	150	174	54	46	2018.48	50	2	25	6098.27		852.605	73.1302	1978-06-16	1165.87	0	0	0	40	10
1	1978-07-14	250	155	174	54	46	2018.48	50	3	28	6098.27		852.605	73.1302	1978-06-16	1165.87	0	0	0	40	10
1	1978-06-16	200	150	175	43	43	1492.87	0	1	0	4511.98		0	0	1978-06-16	1492.87	0	0	0	0	0
1	1978-06-20	240	180	175	48	47	1821.68	0	2	4	5504.33		328.81	22.0254	1978-06-16	1492.87	0	0	0	0	0
1	1978-06-23	190	170	175	53	53	2267.96	0	2	7	6851.21		775.096	51.92	1978-06-16	1492.87	0	0	0	0	0
1	1978-06-27	190	150	175	53	53	2267.96	0	2	11	6851.21		775.096	51.92	1978-06-16	1492.87	0	0	0	0	0
1	1978-06-30	210	170	175	53	53	2267.96	0	2	14	6851.21		775.096	51.92	1978-06-16	1492.87	0	0	0	0	0
1	1978-07-04	230	225	175	53	53	2267.96	22	2	18	6851.21		775.096	51.92	1978-06-16	1492.87	0	0	0	2	20
1	1978-07-07	245	230	175	53	53	2267.96	60	2	21	6851.21		775.096	51.92	1978-06-16	1492.87	0	0	0	30	30
1	1978-07-11	190	150	175	53	53	2267.96	60	3	25	6851.21		775.096	51.92	1978-06-16	1492.87	0	0	0	30	30
1	1978-06-16	200	150	176	47	39	1492.87	0	1	0	4511.98		0	0	1978-06-16	1492.87	0	0	0	0	0
1	1978-06-20	240	180	176	49	41	1634.97	0	2	4	4940.84		142.101	9.51866	1978-06-16	1492.87	0	0	0	0	0
1	1978-06-23	190	170	176	49	41	1634.97	0	2	7	4940.84		142.101	9.51866	1978-06-16	1492.87	0	0	0	0	0
1	1978-06-27	190	150	176	49	41	1634.97	0	2	11	4940.84		142.101	9.51866	1978-06-16	1492.87	0	0	0	0	0
1	1978-06-30	210	170	176	49	43	1708.44	50	2	14	5162.58		215.573	14.4402	1978-06-16	1492.87	0	0	0	0	50
1	1978-07-04	230	225	176	49	43	1708.44	50	2	18	5162.58		215.573	14.4402	1978-06-16	1492.87	0	0	0	0	50
1	1978-07-07	245	230	176	49	43	1708.44	60	2	21	5162.58		215.573	14.4402	1978-06-16	1492.87	0	0	0	10	50
1	1978-07-11	190	150	176	49	43	1708.44	100	2	25	5162.58		215.573	14.4402	1978-06-16	1492.87	0	0	0	20	80
1	1978-07-14	250	155	176	49	43	1708.44	100	2	28	5162.58		215.573	14.4402	1978-06-16	1492.87	0	0	30	50	20
1	1978-07-18	255	160	176	49	43	1708.44	100	3	32	5162.58		215.573	14.4402	1978-06-16	1492.87	0	0	30	50	20
1	1978-06-20	240	180	177	48	44	1708.44	0	1	0	5162.58		0	0	1978-06-20	1708.44	0	0	0	0	0
1	1978-06-23	190	170	177	49	44	1745.78	0	2	3	5275.27		37.3418	2.18573	1978-06-20	1708.44	0	0	0	0	0
1	1978-06-27	190	150	177	49	44	1745.78	0	2	7	5275.27		37.3418	2.18573	1978-06-20	1708.44	0	0	0	0	0
1	1978-06-30	210	170	177	49	45	1783.53	0	2	10	5389.19		75.0874	4.39509	1978-06-20	1708.44	0	0	0	0	0
1	1978-07-04	230	225	177	54	49	2141.4	0	2	14	6469.26		432.964	25.3426	1978-06-20	1708.44	0	0	0	0	0
1	1978-07-07	245	230	177	57	51	2354.35	0	2	17	7111.94		645.913	37.8072	1978-06-20	1708.44	0	0	0	0	0
1	1978-07-11	190	150	177	58	52	2442.36	0	2	21	7377.54		733.919	42.9584	1978-06-20	1708.44	0	0	0	0	0
1	1978-07-14	250	155	177	58	52	2442.36	100	2	24	7377.54		733.919	42.9584	1978-06-20	1708.44	0	0	0	25	75
1	1978-07-18	255	160	177	58	52	2442.36	100	3	28	7377.54		733.919	42.9584	1978-06-20	1708.44	0	0	0	25	75
1	1978-06-20	240	180	178	48	47	1821.68	0	1	0	5504.33		0	0	1978-06-20	1821.68	0	0	0	0	0
1	1978-06-23	190	170	178	48	47	1821.68	0	2	3	5504.33		0	0	1978-06-20	1821.68	0	0	0	0	0
1	1978-06-27	190	150	178	48	47	1821.68	0	2	7	5504.33		0	0	1978-06-20	1821.68	0	0	0	0	0
1	1978-06-30	210	170	178	48	48	1860.23	0	2	10	5620.68		38.5529	2.11634	1978-06-20	1821.68	0	0	0	0	0
1	1978-07-04	230	225	178	51	50	2059.05	0	2	14	6220.72		237.373	13.0305	1978-06-20	1821.68	0	0	0	0	0
1	1978-07-07	245	230	178	52	50	2100.02	0	2	17	6344.38		278.348	15.2798	1978-06-20	1821.68	0	0	0	0	0
1	1978-07-11	190	150	178	52	50	2100.02	30	2	21	6344.38		278.348	15.2798	1978-06-20	1821.68	0	0	0	30	0
1	1978-07-14	250	155	178	52	50	2100.02	70	2	24	6344.38		278.348	15.2798	1978-06-20	1821.68	0	0	0	40	30
1	1978-07-18	255	160	178	52	50	2100.02	70	3	28	6344.38		278.348	15.2798	1978-06-20	1821.68	0	0	0	40	30
1	1978-06-20	240	180	179	47	45	1708.44	0	1	0	5162.58		0	0	1978-06-20	1708.44	0	0	0	0	0
1	1978-06-23	190	170	179	48	46	1783.53	0	2	3	5389.19		75.0874	4.39509	1978-06-20	1708.44	0	0	0	0	0
1	1978-06-27	190	150	179	48	46	1783.53	0	2	7	5389.19		75.0874	4.39509	1978-06-20	1708.44	0	0	0	0	0
1	1978-06-30	210	170	179	48	46	1783.53	0	2	10	5389.19		75.0874	4.39509	1978-06-20	1708.44	0	0	0	0	0
1	1978-07-04	230	225	179	52	50	2100.02	0	2	14	6344.38		391.585	22.9206	1978-06-20	1708.44	0	0	0	0	0
1	1978-07-07	245	230	179	52	50	2100.02	0	2	17	6344.38		391.585	22.9206	1978-06-20	1708.44	0	0	0	0	0
1	1978-07-11	190	150	179	52	50	2100.02	5	2	21	6344.38		391.585	22.9206	1978-06-20	1708.44	0	0	0	5	0
1	1978-07-14	250	155	179	52	50	2100.02	45	2	24	6344.38		391.585	22.9206	1978-06-20	1708.44	0	0	0	25	20
1	1978-07-18	255	160	179	52	50	2100.02	45	3	28	6344.38		391.585	22.9206	1978-06-20	1708.44	0	0	0	25	20
1	1978-06-20	240	180	180	44	39	1390.53	0	1	0	4203.12		0	0	1978-06-20	1390.53	0	0	0	0	0
1	1978-06-23	190	170	180	46	40	1492.87	0	2	3	4511.98		102.337	7.35956	1978-06-20	1390.53	0	0	0	0	0
1	1978-06-27	190	150	180	46	40	1492.87	0	2	7	4511.98		102.337	7.35956	1978-06-20	1390.53	0	0	0	0	0
1	1978-06-30	210	170	180	46	40	1492.87	0	2	10	4511.98		102.337	7.35956	1978-06-20	1390.53	0	0	0	0	0
1	1978-07-04	230	225	180	48	43	1671.5	0	2	14	5051.1		280.972	20.2061	1978-06-20	1390.53	0	0	0	0	0
1	1978-07-07	245	230	180	48	44	1708.44	0	2	17	5162.58		317.91	22.8625	1978-06-20	1390.53	0	0	0	0	0
1	1978-07-11	190	150	180	48	44	1708.44	5	2	21	5162.58		317.91	22.8625	1978-06-20	1390.53	0	0	0	5	0
1	1978-07-14	250	155	180	48	44	1708.44	100	2	24	5162.58		317.91	22.8625	1978-06-20	1390.53	0	0	0	20	80
1	1978-07-18	255	160	180	48	45	1745.78	100	2	28	5275.27		355.252	25.548	1978-06-20	1390.53	0	0	30	40	30
1	1978-07-24	270	170	180	48	45	1745.78	100	3	34	5275.27		355.252	25.548	1978-06-20	1390.53	0	0	30	40	30
1	1978-06-20	240	180	181	60	54	2623.21	0	1	0	7923.37		0	0	1978-06-20	2623.21	0	0	0	0	0
1	1978-06-23	190	170	181	60	55	2669.44	0	2	3	8062.87		46.2231	1.76208	1978-06-20	2623.21	0	0	0	0	0
1	1978-06-27	190	150	181	61	55	2716.06	0	2	7	8203.59		92.85	3.53955	1978-06-20	2623.21	0	0	0	0	0
1	1978-06-30	210	170	181	61	55	2716.06	0	2	10	8203.59		92.85	3.53955	1978-06-20	2623.21	0	0	0	0	0
1	1978-07-04	230	225	181	61	57	2810.53	0	2	14	8488.68		187.315	7.14066	1978-06-20	2623.21	0	0	0	0	0
1	1978-07-07	245	230	181	62	57	2858.37	0	2	17	8633.06		235.153	8.9643	1978-06-20	2623.21	0	0	0	0	0
1	1978-07-11	190	150	181	62	58	2906.61	10	2	21	8778.65		283.394	10.8033	1978-06-20	2623.21	0	0	0	10	0
1	1978-07-14	250	155	181	62	58	2906.61	100	2	24	8778.65		283.394	10.8033	1978-06-20	2623.21	0	0	0	20	80
1	1978-07-18	255	160	181	62	58	2906.61	100	2	28	8778.65		283.394	10.8033	1978-06-20	2623.21	0	10	20	30	40
1	1978-07-24	270	170	181	62	58	2906.61	100	3	34	8778.65		283.394	10.8033	1978-06-20	2623.21	0	10	20	30	40
1	1978-06-20	240	180	182	33	35	933.344	0	1	0	2823.34		0	0	1978-06-20	933.344	0	0	0	0	0
1	1978-06-23	190	170	182	33	35	933.344	0	2	3	2823.34		0	0	1978-06-20	933.344	0	0	0	0	0
1	1978-06-27	190	150	182	33	36	960.997	0	2	7	2906.8		27.6531	2.9628	1978-06-20	933.344	0	0	0	0	0
1	1978-06-30	210	170	182	34	38	1046.38	0	2	10	3164.48		113.035	12.1107	1978-06-20	933.344	0	0	0	0	0
1	1978-07-04	230	225	182	38	42	1291.83	0	2	14	3905.24		358.482	38.4083	1978-06-20	933.344	0	0	0	0	0
1	1978-07-07	245	230	182	38	42	1291.83	0	2	17	3905.24		358.482	38.4083	1978-06-20	933.344	0	0	0	0	0
1	1978-07-11	190	150	182	38	43	1324.32	0	2	21	4003.31		390.979	41.8901	1978-06-20	933.344	0	0	0	0	0
1	1978-07-14	250	155	182	38	43	1324.32	10	2	24	4003.31		390.979	41.8901	1978-06-20	933.344	0	0	0	10	0
1	1978-07-18	255	160	182	38	43	1324.32	100	2	28	4003.31		390.979	41.8901	1978-06-20	933.344	0	0	0	30	70
1	1978-07-24	270	170	182	38	43	1324.32	100	3	34	4003.31		390.979	41.8901	1978-06-20	933.344	0	0	0	30	70
1	1978-06-20	240	180	183	41	37	1228.04	0	1	0	3712.74		0	0	1978-06-20	1228.04	0	0	0	0	0
1	1978-06-23	190	170	183	41	38	1259.73	0	2	3	3808.38		31.6901	2.58054	1978-06-20	1228.04	0	0	0	0	0
1	1978-06-27	190	150	183	42	38	1291.83	0	2	7	3905.24		63.7839	5.19395	1978-06-20	1228.04	0	0	0	0	0
1	1978-06-30	210	170	183	52	48	2018.48	0	2	10	6098.27		790.436	64.3655	1978-06-20	1228.04	0	0	0	0	0
1	1978-07-04	230	225	183	52	48	2018.48	0	2	14	6098.27		790.436	64.3655	1978-06-20	1228.04	0	0	0	0	0
1	1978-07-07	245	230	183	54	50	2183.19	0	2	17	6595.36		955.144	77.7778	1978-06-20	1228.04	0	0	0	0	0
1	1978-07-11	190	150	183	56	51	2310.96	0	2	21	6980.97		1082.91	88.1821	1978-06-20	1228.04	0	0	0	0	0
1	1978-07-14	250	155	183	56	51	2310.96	10	2	24	6980.97		1082.91	88.1821	1978-06-20	1228.04	0	0	0	10	0
1	1978-07-18	255	160	183	56	51	2310.96	50	2	28	6980.97		1082.91	88.1821	1978-06-20	1228.04	0	0	0	30	20
1	1978-07-24	270	170	183	56	51	2310.96	50	3	34	6980.97		1082.91	88.1821	1978-06-20	1228.04	0	0	0	30	20
1	1978-06-20	240	180	184	51	47	1938.55	0	1	0	5857.04		0	0	1978-06-20	1938.55	0	0	0	0	0
1	1978-06-23	190	170	184	55	48	2141.4	0	2	3	6469.26		202.857	10.4644	1978-06-20	1938.55	0	0	0	0	0
1	1978-06-27	190	150	184	57	49	2267.96	0	2	7	6851.21		329.416	16.9929	1978-06-20	1938.55	0	0	0	0	0
1	1978-06-30	210	170	184	57	49	2267.96	0	2	10	6851.21		329.416	16.9929	1978-06-20	1938.55	0	0	0	0	0
1	1978-07-04	230	225	184	59	50	2398.15	0	2	14	7244.13		459.607	23.7089	1978-06-20	1938.55	0	0	0	0	0
1	1978-07-07	245	230	184	59	51	2442.36	0	2	17	7377.54		503.812	25.9892	1978-06-20	1938.55	0	0	0	0	0
1	1978-07-11	190	150	184	60	51	2486.97	10	2	21	7512.17		548.42	28.2903	1978-06-20	1938.55	0	0	0	10	0
1	1978-07-14	250	155	184	60	51	2486.97	10	3	24	7512.17		548.42	28.2903	1978-06-20	1938.55	0	0	0	10	0
1	1978-06-20	240	180	185	56	55	2486.97	0	1	0	7512.17		0	0	1978-06-20	2486.97	0	0	0	0	0
1	1978-06-23	190	170	185	56	55	2486.97	0	2	3	7512.17		0	0	1978-06-20	2486.97	0	0	0	0	0
1	1978-06-27	190	150	185	57	55	2531.98	0	2	7	7648.02		45.0121	1.80992	1978-06-20	2486.97	0	0	0	0	0
1	1978-06-30	210	170	185	58	55	2577.39	0	2	10	7785.08		90.4278	3.63607	1978-06-20	2486.97	0	0	0	0	0
1	1978-07-04	230	225	185	58	55	2577.39	0	2	14	7785.08		90.4278	3.63607	1978-06-20	2486.97	0	0	0	0	0
1	1978-07-07	245	230	185	58	57	2669.44	0	2	17	8062.87		182.47	7.33707	1978-06-20	2486.97	0	0	0	0	0
1	1978-07-11	190	150	185	59	57	2716.06	10	2	21	8203.59		229.097	9.21191	1978-06-20	2486.97	0	0	0	10	0
1	1978-07-14	250	155	185	59	57	2716.06	40	2	24	8203.59		229.097	9.21191	1978-06-20	2486.97	0	0	0	20	20
1	1978-07-18	255	160	185	59	57	2716.06	100	2	28	8203.59		229.097	9.21191	1978-06-20	2486.97	0	10	25	25	40
1	1978-07-24	270	170	185	59	57	2716.06	100	3	34	8203.59		229.097	9.21191	1978-06-20	2486.97	0	10	25	25	40
1	1978-06-20	240	180	186	49	47	1860.23	0	1	0	5620.68		0	0	1978-06-20	1860.23	0	0	0	0	0
1	1978-06-23	190	170	186	49	47	1860.23	0	2	3	5620.68		0	0	1978-06-20	1860.23	0	0	0	0	0
1	1978-06-27	190	150	186	51	48	1978.31	0	2	7	5977.05		118.081	6.34766	1978-06-20	1860.23	0	0	0	0	0
1	1978-06-30	210	170	186	51	48	1978.31	0	2	10	5977.05		118.081	6.34766	1978-06-20	1860.23	0	0	0	0	0
1	1978-07-04	230	225	186	51	50	2059.05	0	2	14	6220.72		198.82	10.6879	1978-06-20	1860.23	0	0	0	0	0
1	1978-07-07	245	230	186	51	50	2059.05	2	2	17	6220.72		198.82	10.6879	1978-06-20	1860.23	0	0	0	2	0
1	1978-07-11	190	150	186	51	50	2059.05	100	2	21	6220.72		198.82	10.6879	1978-06-20	1860.23	0	0	0	15	85
1	1978-07-14	250	155	186	51	50	2059.05	100	2	24	6220.72		198.82	10.6879	1978-06-20	1860.23	0	0	0	30	70
1	1978-07-18	255	160	186	51	50	2059.05	100	3	28	6220.72		198.82	10.6879	1978-06-20	1860.23	0	0	0	30	70
1	1978-06-20	240	180	187	70	67	3788.48	0	1	0	11440.1		0	0	1978-06-20	3788.48	0	0	0	0	0
1	1978-06-23	190	170	187	71	67	3843.99	0	2	3	11607.7		55.5081	1.46518	1978-06-20	3788.48	0	0	0	0	0
1	1978-06-27	190	150	187	71	67	3843.99	0	2	7	11607.7		55.5081	1.46518	1978-06-20	3788.48	0	0	0	0	0
1	1978-06-30	210	170	187	71	68	3899.9	0	2	10	11776.4		111.42	2.94102	1978-06-20	3788.48	0	0	0	0	0
1	1978-07-04	230	225	187	72	69	4012.94	0	2	14	12117.5		224.455	5.92466	1978-06-20	3788.48	0	0	0	0	0
1	1978-07-07	245	230	187	72	69	4012.94	10	2	17	12117.5		224.455	5.92466	1978-06-20	3788.48	0	0	0	10	0
1	1978-07-11	190	150	187	72	69	4012.94	70	2	21	12117.5		224.455	5.92466	1978-06-20	3788.48	0	0	0	50	20
1	1978-07-14	250	155	187	72	69	4012.94	70	3	24	12117.5		224.455	5.92466	1978-06-20	3788.48	0	0	0	50	20
1	1978-06-20	240	180	188	58	57	2669.44	0	1	0	8062.87		0	0	1978-06-20	2669.44	0	0	0	0	0
1	1978-06-23	190	170	188	58	57	2669.44	0	2	3	8062.87		0	0	1978-06-20	2669.44	0	0	0	0	0
1	1978-06-27	190	150	188	58	57	2669.44	0	2	7	8062.87		0	0	1978-06-20	2669.44	0	0	0	0	0
1	1978-06-30	210	170	188	58	57	2669.44	0	2	10	8062.87		0	0	1978-06-20	2669.44	0	0	0	0	0
1	1978-07-04	230	225	188	60	57	2763.09	0	2	14	8345.53		93.6574	3.50851	1978-06-20	2669.44	0	0	0	0	0
1	1978-07-07	245	230	188	60	57	2763.09	0	2	17	8345.53		93.6574	3.50851	1978-06-20	2669.44	0	0	0	0	0
1	1978-07-11	190	150	188	62	57	2858.37	10	2	21	8633.06		188.93	7.0775	1978-06-20	2669.44	0	0	0	10	0
1	1978-07-14	250	155	188	62	57	2858.37	35	2	24	8633.06		188.93	7.0775	1978-06-20	2669.44	0	0	0	25	10
1	1978-07-18	255	160	188	62	57	2858.37	100	2	28	8633.06		188.93	7.0775	1978-06-20	2669.44	0	0	10	40	50
1	1978-07-24	270	170	188	62	57	2858.37	100	3	34	8633.06		188.93	7.0775	1978-06-20	2669.44	0	0	10	40	50
1	1978-06-20	240	180	189	50	47	1899.19	0	1	0	5738.25		0	0	1978-06-20	1899.19	0	0	0	0	0
1	1978-06-23	190	170	189	51	48	1978.31	0	2	3	5977.05		79.1243	4.16622	1978-06-20	1899.19	0	0	0	0	0
1	1978-06-27	190	150	189	51	48	1978.31	0	2	7	5977.05		79.1243	4.16622	1978-06-20	1899.19	0	0	0	0	0
1	1978-06-30	210	170	189	51	48	1978.31	0	2	10	5977.05		79.1243	4.16622	1978-06-20	1899.19	0	0	0	0	0
1	1978-07-04	230	225	189	51	48	1978.31	0	2	14	5977.05		79.1243	4.16622	1978-06-20	1899.19	0	0	0	0	0
1	1978-07-07	245	230	189	53	49	2100.02	0	2	17	6344.38		200.839	10.575	1978-06-20	1899.19	0	0	0	0	0
1	1978-07-11	190	150	189	53	49	2100.02	10	2	21	6344.38		200.839	10.575	1978-06-20	1899.19	0	0	0	10	0
1	1978-07-14	250	155	189	53	49	2100.02	100	2	24	6344.38		200.839	10.575	1978-06-20	1899.19	0	0	0	20	80
1	1978-07-18	255	160	189	53	50	2141.4	100	2	28	6469.26		242.217	12.7537	1978-06-20	1899.19	0	0	25	25	50
1	1978-07-24	270	170	189	53	50	2141.4	100	3	34	6469.26		242.217	12.7537	1978-06-20	1899.19	0	0	25	25	50
1	1978-06-20	240	180	190	45	45	1634.97	0	1	0	4940.84		0	0	1978-06-20	1634.97	0	0	0	0	0
1	1978-06-23	190	170	190	45	45	1634.97	0	2	3	4940.84		0	0	1978-06-20	1634.97	0	0	0	0	0
1	1978-06-27	190	150	190	46	46	1708.44	0	2	7	5162.58		73.4726	4.49383	1978-06-20	1634.97	0	0	0	0	0
1	1978-06-30	210	170	190	46	46	1708.44	0	2	10	5162.58		73.4726	4.49383	1978-06-20	1634.97	0	0	0	0	0
1	1978-07-04	230	225	190	50	50	2018.48	0	2	14	6098.27		383.511	23.4568	1978-06-20	1634.97	0	0	0	0	0
1	1978-07-07	245	230	190	53	53	2267.96	0	2	17	6851.21		632.995	38.716	1978-06-20	1634.97	0	0	0	0	0
1	1978-07-11	190	150	190	54	54	2354.35	5	2	21	7111.94		719.386	44	1978-06-20	1634.97	0	0	0	5	0
1	1978-07-14	250	155	190	54	54	2354.35	100	2	24	7111.94		719.386	44	1978-06-20	1634.97	0	0	0	15	85
1	1978-07-18	255	160	190	54	54	2354.35	100	2	28	7111.94		719.386	44	1978-06-20	1634.97	0	0	0	30	70
1	1978-07-24	270	170	190	54	54	2354.35	100	3	34	7111.94		719.386	44	1978-06-20	1634.97	0	0	0	30	70
1	1978-06-20	240	180	191	58	56	2623.21	0	1	0	7923.37		0	0	1978-06-20	2623.21	0	0	0	0	0
1	1978-06-23	190	170	191	58	57	2669.44	0	2	3	8062.87		46.2231	1.76208	1978-06-20	2623.21	0	0	0	0	0
1	1978-06-27	190	150	191	58	57	2669.44	0	2	7	8062.87		46.2231	1.76208	1978-06-20	2623.21	0	0	0	0	0
1	1978-06-30	210	170	191	63	58	2955.25	0	2	10	8925.46		332.04	12.6577	1978-06-20	2623.21	0	0	0	0	0
1	1978-07-04	230	225	191	65	59	3103.61	0	2	14	9373.21		480.398	18.3133	1978-06-20	2623.21	0	0	0	0	0
1	1978-07-07	245	230	191	65	59	3103.61	5	2	17	9373.21		480.398	18.3133	1978-06-20	2623.21	0	0	0	5	0
1	1978-07-11	190	150	191	65	59	3103.61	15	2	21	9373.21		480.398	18.3133	1978-06-20	2623.21	0	0	0	15	0
1	1978-07-14	250	155	191	65	59	3103.61	45	2	24	9373.21		480.398	18.3133	1978-06-20	2623.21	0	0	0	25	20
1	1978-07-18	255	160	191	65	59	3103.61	100	2	28	9373.21		480.398	18.3133	1978-06-20	2623.21	0	0	0	40	60
1	1978-07-24	270	170	191	65	59	3103.61	100	3	34	9373.21		480.398	18.3133	1978-06-20	2623.21	0	0	0	40	60
1	1978-06-23	190	170	192	50	46	1860.23	0	1	0	5620.68		0	0	1978-06-23	1860.23	0	0	0	0	0
1	1978-06-27	190	150	192	51	47	1938.55	0	2	4	5857.04		78.3169	4.21007	1978-06-23	1860.23	0	0	0	0	0
1	1978-06-30	210	170	192	51	47	1938.55	0	2	7	5857.04		78.3169	4.21007	1978-06-23	1860.23	0	0	0	0	0
1	1978-07-04	230	225	192	51	48	1978.31	0	2	11	5977.05		118.081	6.34766	1978-06-23	1860.23	0	0	0	0	0
1	1978-07-07	245	230	192	51	51	2100.02	10	2	14	6344.38		239.795	12.8906	1978-06-23	1860.23	0	0	0	10	0
1	1978-07-11	190	150	192	51	51	2100.02	10	2	18	6344.38		239.795	12.8906	1978-06-23	1860.23	0	0	0	10	0
1	1978-07-14	250	155	192	51	52	2141.4	50	2	21	6469.26		281.174	15.115	1978-06-23	1860.23	0	0	0	20	30
1	1978-07-18	255	160	192	51	52	2141.4	55	2	25	6469.26		281.174	15.115	1978-06-23	1860.23	0	0	0	35	20
1	1978-07-24	270	170	192	51	52	2141.4	55	3	31	6469.26		281.174	15.115	1978-06-23	1860.23	0	0	0	35	20
1	1978-06-23	190	170	193	45	43	1563.11	0	1	0	4723.97		0	0	1978-06-23	1563.11	0	0	0	0	0
1	1978-06-27	190	150	193	45	43	1563.11	0	2	4	4723.97		0	0	1978-06-23	1563.11	0	0	0	0	0
1	1978-06-30	210	170	193	45	43	1563.11	0	2	7	4723.97		0	0	1978-06-23	1563.11	0	0	0	0	0
1	1978-07-04	230	225	193	52	47	1978.31	0	2	11	5977.05		415.201	26.5625	1978-06-23	1563.11	0	0	0	0	0
1	1978-07-07	245	230	193	55	50	2225.37	0	2	14	6722.68		662.263	42.3683	1978-06-23	1563.11	0	0	0	0	0
1	1978-07-11	190	150	193	56	51	2310.96	0	2	18	6980.97		747.846	47.8435	1978-06-23	1563.11	0	0	0	0	0
1	1978-07-14	250	155	193	56	51	2310.96	5	2	21	6980.97		747.846	47.8435	1978-06-23	1563.11	0	0	0	5	0
1	1978-07-18	255	160	193	56	51	2310.96	30	2	25	6980.97		747.846	47.8435	1978-06-23	1563.11	0	0	0	20	10
1	1978-07-24	270	170	193	56	51	2310.96	30	3	31	6980.97		747.846	47.8435	1978-06-23	1563.11	0	0	0	20	10
1	1978-06-23	190	170	194	48	46	1783.53	0	1	0	5389.19		0	0	1978-06-23	1783.53	0	0	0	0	0
1	1978-06-27	190	150	194	48	46	1783.53	0	2	4	5389.19		0	0	1978-06-23	1783.53	0	0	0	0	0
1	1978-06-30	210	170	194	50	47	1899.19	0	2	7	5738.25		115.659	6.48483	1978-06-23	1783.53	0	0	0	0	0
1	1978-07-04	230	225	194	50	47	1899.19	0	2	11	5738.25		115.659	6.48483	1978-06-23	1783.53	0	0	0	0	0
1	1978-07-07	245	230	194	50	48	1938.55	1	2	14	5857.04		155.019	8.69172	1978-06-23	1783.53	0	0	0	1	0
1	1978-07-11	190	150	194	50	48	1938.55	100	2	18	5857.04		155.019	8.69172	1978-06-23	1783.53	0	0	0	25	75
1	1978-07-14	250	155	194	50	48	1938.55	100	3	21	5857.04		155.019	8.69172	1978-06-23	1783.53	0	0	0	25	75
1	1978-06-23	190	170	195	48	44	1708.44	0	1	0	5162.58		0	0	1978-06-23	1708.44	0	0	0	0	0
1	1978-06-27	190	150	195	48	44	1708.44	0	2	4	5162.58		0	0	1978-06-23	1708.44	0	0	0	0	0
1	1978-06-30	210	170	195	49	44	1745.78	0	2	7	5275.27		37.3418	2.18573	1978-06-23	1708.44	0	0	0	0	0
1	1978-07-04	230	225	195	49	44	1745.78	0	2	11	5275.27		37.3418	2.18573	1978-06-23	1708.44	0	0	0	0	0
1	1978-07-07	245	230	195	49	45	1783.53	5	2	14	5389.19		75.0874	4.39509	1978-06-23	1708.44	0	0	0	5	0
1	1978-07-11	190	150	195	49	45	1783.53	40	2	18	5389.19		75.0874	4.39509	1978-06-23	1708.44	0	0	0	40	0
1	1978-07-14	250	155	195	49	45	1783.53	100	2	21	5389.19		75.0874	4.39509	1978-06-23	1708.44	0	10	0	50	40
1	1978-07-18	255	160	195	49	45	1783.53	100	3	25	5389.19		75.0874	4.39509	1978-06-23	1708.44	0	10	0	50	40
1	1978-06-23	190	170	196	49	44	1745.78	0	1	0	5275.27		0	0	1978-06-23	1745.78	0	0	0	0	0
1	1978-06-27	190	150	196	49	45	1783.53	0	2	4	5389.19		37.7455	2.1621	1978-06-23	1745.78	0	0	0	0	0
1	1978-06-30	210	170	196	49	45	1783.53	0	2	7	5389.19		37.7455	2.1621	1978-06-23	1745.78	0	0	0	0	0
1	1978-07-04	230	225	196	50	45	1821.68	0	2	11	5504.33		75.8948	4.34732	1978-06-23	1745.78	0	0	0	0	0
1	1978-07-07	245	230	196	51	46	1899.19	0	2	14	5738.25		153.404	8.78714	1978-06-23	1745.78	0	0	0	0	0
1	1978-07-11	190	150	196	51	46	1899.19	0	2	18	5738.25		153.404	8.78714	1978-06-23	1745.78	0	0	0	0	0
1	1978-07-14	250	155	196	51	46	1899.19	10	2	21	5738.25		153.404	8.78714	1978-06-23	1745.78	0	0	0	10	0
1	1978-07-18	255	160	196	51	46	1899.19	35	2	25	5738.25		153.404	8.78714	1978-06-23	1745.78	0	0	0	20	15
1	1978-07-24	270	170	196	51	46	1899.19	35	3	31	5738.25		153.404	8.78714	1978-06-23	1745.78	0	0	0	20	15
1	1978-06-23	190	170	197	43	44	1527.79	0	1	0	4617.36		0	0	1978-06-23	1527.79	0	0	0	0	0
1	1978-06-27	190	150	197	44	44	1563.11	0	2	4	4723.97		35.3234	2.31206	1978-06-23	1527.79	0	0	0	0	0
1	1978-06-30	210	170	197	44	44	1563.11	0	2	7	4723.97		35.3234	2.31206	1978-06-23	1527.79	0	0	0	0	0
1	1978-07-04	230	225	197	44	44	1563.11	0	2	11	4723.97		35.3234	2.31206	1978-06-23	1527.79	0	0	0	0	0
1	1978-07-07	245	230	197	45	45	1634.97	1	2	14	4940.84		107.181	7.01546	1978-06-23	1527.79	1	0	0	0	0
1	1978-07-11	190	150	197	45	45	1634.97	100	2	18	4940.84		107.181	7.01546	1978-06-23	1527.79	1	0	0	5	94
1	1978-07-14	250	155	197	45	45	1634.97	100	2	21	4940.84		107.181	7.01546	1978-06-23	1527.79	1	0	0	20	79
1	1978-07-18	255	160	197	45	45	1634.97	100	2	25	4940.84		107.181	7.01546	1978-06-23	1527.79	0	0	25	35	40
1	1978-07-24	270	170	197	45	45	1634.97	100	3	31	4940.84		107.181	7.01546	1978-06-23	1527.79	0	0	25	35	40
1	1978-06-23	190	170	198	53	46	1978.31	0	1	0	5977.05		0	0	1978-06-23	1978.31	0	0	0	0	0
1	1978-06-27	190	150	198	53	46	1978.31	0	2	4	5977.05		0	0	1978-06-23	1978.31	0	0	0	0	0
1	1978-06-30	210	170	198	54	46	2018.48	0	2	7	6098.27		40.1677	2.03041	1978-06-23	1978.31	0	0	0	0	0
1	1978-07-04	230	225	198	54	46	2018.48	0	2	11	6098.27		40.1677	2.03041	1978-06-23	1978.31	0	0	0	0	0
1	1978-07-07	245	230	198	54	46	2018.48	0	2	14	6098.27		40.1677	2.03041	1978-06-23	1978.31	0	0	0	0	0
1	1978-07-11	190	150	198	55	46	2059.05	0	2	18	6220.72		80.7391	4.08122	1978-06-23	1978.31	0	0	0	0	0
1	1978-07-14	250	155	198	55	46	2059.05	5	2	21	6220.72		80.7391	4.08122	1978-06-23	1978.31	0	0	0	5	0
1	1978-07-18	255	160	198	55	46	2059.05	35	2	25	6220.72		80.7391	4.08122	1978-06-23	1978.31	5	0	0	10	20
1	1978-07-24	270	170	198	55	46	2059.05	100	2	31	6220.72		80.7391	4.08122	1978-06-23	1978.31	0	10	0	60	30
1	1978-07-27	260	185	198	55	46	2059.05	100	3	34	6220.72		80.7391	4.08122	1978-06-23	1978.31	0	10	0	60	30
1	1978-06-23	190	170	199	54	50	2183.19	0	1	0	6595.36		0	0	1978-06-23	2183.19	0	0	0	0	0
1	1978-06-27	190	150	199	56	51	2310.96	0	2	4	6980.97		127.77	5.85244	1978-06-23	2183.19	0	0	0	0	0
1	1978-06-30	210	170	199	56	51	2310.96	0	2	7	6980.97		127.77	5.85244	1978-06-23	2183.19	0	0	0	0	0
1	1978-07-04	230	225	199	56	51	2310.96	30	2	11	6980.97		127.77	5.85244	1978-06-23	2183.19	0	0	0	0	30
1	1978-07-07	245	230	199	56	51	2310.96	100	2	14	6980.97		127.77	5.85244	1978-06-23	2183.19	0	0	5	0	95
1	1978-07-11	190	150	199	56	51	2310.96	100	3	18	6980.97		127.77	5.85244	1978-06-23	2183.19	0	0	5	0	95
1	1978-06-23	190	170	200	49	43	1708.44	0	1	0	5162.58		0	0	1978-06-23	1708.44	0	0	0	0	0
1	1978-06-27	190	150	200	49	44	1745.78	0	2	4	5275.27		37.3418	2.18573	1978-06-23	1708.44	0	0	0	0	0
1	1978-06-30	210	170	200	50	44	1783.53	0	2	7	5389.19		75.0874	4.39509	1978-06-23	1708.44	0	0	0	0	0
1	1978-07-04	230	225	200	51	44	1821.68	0	2	11	5504.33		113.237	6.62807	1978-06-23	1708.44	0	0	0	0	0
1	1978-07-07	245	230	200	51	44	1821.68	0	2	14	5504.33		113.237	6.62807	1978-06-23	1708.44	0	0	0	0	0
1	1978-07-11	190	150	200	51	44	1821.68	100	2	18	5504.33		113.237	6.62807	1978-06-23	1708.44	0	0	0	0	100
1	1978-07-14	250	155	200	51	45	1860.23	100	2	21	5620.68		151.79	8.88469	1978-06-23	1708.44	0	0	0	0	100
1	1978-07-18	255	160	200	51	45	1860.23	100	2	25	5620.68		151.79	8.88469	1978-06-23	1708.44	0	0	50	0	50
1	1978-07-24	270	170	200	51	45	1860.23	100	3	31	5620.68		151.79	8.88469	1978-06-23	1708.44	0	0	50	0	50
1	1978-06-23	190	170	201	53	50	2141.4	0	1	0	6469.26		0	0	1978-06-23	2141.4	0	0	0	0	0
1	1978-06-27	190	150	201	55	52	2310.96	0	2	4	6980.97		169.552	7.91781	1978-06-23	2141.4	0	0	0	0	0
1	1978-06-30	210	170	201	55	52	2310.96	0	2	7	6980.97		169.552	7.91781	1978-06-23	2141.4	0	0	0	0	0
1	1978-07-04	230	225	201	57	53	2442.36	0	2	11	7377.54		300.955	14.0541	1978-06-23	2141.4	0	0	0	0	0
1	1978-07-07	245	230	201	57	53	2442.36	15	2	14	7377.54		300.955	14.0541	1978-06-23	2141.4	0	0	0	15	0
1	1978-07-11	190	150	201	57	53	2442.36	100	2	18	7377.54		300.955	14.0541	1978-06-23	2141.4	0	0	0	75	25
1	1978-07-14	250	155	201	57	53	2442.36	100	3	21	7377.54		300.955	14.0541	1978-06-23	2141.4	0	0	0	75	25
1	1978-06-23	190	170	202	62	53	2669.44	0	1	0	8062.87		0	0	1978-06-23	2669.44	0	0	0	0	0
1	1978-06-27	190	150	202	63	53	2716.06	0	2	4	8203.59		46.6268	1.74669	1978-06-23	2669.44	0	0	0	0	0
1	1978-06-30	210	170	202	64	53	2763.09	0	2	7	8345.53		93.6574	3.50851	1978-06-23	2669.44	0	0	0	0	0
1	1978-07-04	230	225	202	64	53	2763.09	0	2	11	8345.53		93.6574	3.50851	1978-06-23	2669.44	0	0	0	0	0
1	1978-07-07	245	230	202	65	54	2858.37	0	2	14	8633.06		188.93	7.0775	1978-06-23	2669.44	0	0	0	0	0
1	1978-07-11	190	150	202	66	54	2906.61	5	2	18	8778.65		237.171	8.88469	1978-06-23	2669.44	0	0	0	5	0
1	1978-07-14	250	155	202	66	54	2906.61	30	2	21	8778.65		237.171	8.88469	1978-06-23	2669.44	0	0	0	20	10
1	1978-07-18	255	160	202	66	54	2906.61	100	2	25	8778.65		237.171	8.88469	1978-06-23	2669.44	0	0	25	25	50
1	1978-07-24	270	170	202	66	54	2906.61	100	3	31	8778.65		237.171	8.88469	1978-06-23	2669.44	0	0	25	25	50
1	1978-06-27	190	150	203	42	34	1165.87	0	1	0	3525.11		0	0	1978-06-27	1165.87	0	0	0	0	0
1	1978-06-30	210	170	203	42	40	1357.22	0	2	3	4102.61		191.352	16.4127	1978-06-27	1165.87	0	0	0	0	0
1	1978-07-04	230	225	203	44	40	1424.24	0	2	7	4304.86		258.365	22.1607	1978-06-27	1165.87	0	0	0	0	0
1	1978-07-07	245	230	203	44	40	1424.24	100	2	10	4304.86		258.365	22.1607	1978-06-27	1165.87	0	0	0	0	100
1	1978-07-11	190	150	203	45	41	1492.87	100	2	14	4511.98		326.993	28.0471	1978-06-27	1165.87	0	0	0	5	95
1	1978-07-14	250	155	203	45	41	1492.87	100	2	17	4511.98		326.993	28.0471	1978-06-27	1165.87	0	0	0	20	80
1	1978-07-18	255	160	203	45	41	1492.87	100	2	21	4511.98		326.993	28.0471	1978-06-27	1165.87	0	0	20	40	40
1	1978-07-24	270	170	203	45	41	1492.87	100	3	27	4511.98		326.993	28.0471	1978-06-27	1165.87	0	0	20	40	40
1	1978-06-27	190	150	204	63	56	2858.37	0	1	0	8633.06		0	0	1978-06-27	2858.37	0	0	0	0	0
1	1978-06-30	210	170	204	65	58	3053.76	0	2	3	9222.74		195.389	6.83568	1978-06-27	2858.37	0	0	0	0	0
1	1978-07-04	230	225	204	67	59	3204.54	0	2	7	9677.79		346.169	12.1107	1978-06-27	2858.37	0	0	0	0	0
1	1978-07-07	245	230	204	67	59	3204.54	0	2	10	9677.79		346.169	12.1107	1978-06-27	2858.37	0	0	0	0	0
1	1978-07-11	190	150	204	69	60	3358.95	5	2	14	10143.8		500.583	17.5129	1978-06-27	2858.37	0	0	0	5	0
1	1978-07-14	250	155	204	69	60	3358.95	15	2	17	10143.8		500.583	17.5129	1978-06-27	2858.37	0	0	0	15	0
1	1978-07-18	255	160	204	69	60	3358.95	100	2	21	10143.8		500.583	17.5129	1978-06-27	2858.37	0	0	0	25	75
1	1978-07-24	270	170	204	69	60	3358.95	100	2	27	10143.8		500.583	17.5129	1978-06-27	2858.37	0	20	0	50	30
1	1978-07-27	260	185	204	69	60	3358.95	100	3	30	10143.8		500.583	17.5129	1978-06-27	2858.37	0	20	0	50	30
1	1978-06-27	190	150	205	52	42	1783.53	0	1	0	5389.19		0	0	1978-06-27	1783.53	0	0	0	0	0
1	1978-06-30	210	170	205	53	46	1978.31	0	2	3	5977.05		194.783	10.9212	1978-06-27	1783.53	0	0	0	0	0
1	1978-07-04	230	225	205	54	46	2018.48	0	2	7	6098.27		234.951	13.1734	1978-06-27	1783.53	0	0	0	0	0
1	1978-07-07	245	230	205	54	47	2059.05	5	2	10	6220.72		275.522	15.4482	1978-06-27	1783.53	0	0	0	5	0
1	1978-07-11	190	150	205	54	47	2059.05	5	3	14	6220.72		275.522	15.4482	1978-06-27	1783.53	0	0	0	5	0
1	1978-06-27	190	150	206	57	55	2531.98	0	1	0	7648.02		0	0	1978-06-27	2531.98	0	0	0	0	0
1	1978-06-30	210	170	206	57	55	2531.98	0	2	3	7648.02		0	0	1978-06-27	2531.98	0	0	0	0	0
1	1978-07-04	230	225	206	58	56	2623.21	0	2	7	7923.37		91.2352	3.60332	1978-06-27	2531.98	0	0	0	0	0
1	1978-07-07	245	230	206	58	56	2623.21	0	2	10	7923.37		91.2352	3.60332	1978-06-27	2531.98	0	0	0	0	0
1	1978-07-11	190	150	206	59	58	2763.09	60	2	14	8345.53		231.116	9.12787	1978-06-27	2531.98	0	0	0	10	50
1	1978-07-14	250	155	206	60	58	2810.53	100	2	17	8488.68		278.55	11.0013	1978-06-27	2531.98	0	0	0	20	80
1	1978-07-18	255	160	206	60	58	2810.53	100	2	21	8488.68		278.55	11.0013	1978-06-27	2531.98	0	0	25	25	50
1	1978-07-24	270	170	206	60	58	2810.53	100	3	27	8488.68		278.55	11.0013	1978-06-27	2531.98	0	0	25	25	50
1	1978-06-27	190	150	207	60	58	2810.53	0	1	0	8488.68		0	0	1978-06-27	2810.53	0	0	0	0	0
1	1978-06-30	210	170	207	60	58	2810.53	0	2	3	8488.68		0	0	1978-06-27	2810.53	0	0	0	0	0
1	1978-07-04	230	225	207	60	58	2810.53	0	2	7	8488.68		0	0	1978-06-27	2810.53	0	0	0	0	0
1	1978-07-07	245	230	207	61	58	2858.37	0	2	10	8633.06		47.8379	1.7021	1978-06-27	2810.53	0	0	0	0	0
1	1978-07-11	190	150	207	61	58	2858.37	10	2	14	8633.06		47.8379	1.7021	1978-06-27	2810.53	0	0	0	10	0
1	1978-07-14	250	155	207	61	58	2858.37	25	2	17	8633.06		47.8379	1.7021	1978-06-27	2810.53	0	0	0	25	0
1	1978-07-18	255	160	207	61	58	2858.37	100	2	21	8633.06		47.8379	1.7021	1978-06-27	2810.53	0	0	0	30	70
1	1978-07-24	270	170	207	61	58	2858.37	100	3	27	8633.06		47.8379	1.7021	1978-06-27	2810.53	0	0	0	30	70
1	1978-06-27	190	150	208	64	52	2716.06	0	1	0	8203.59		0	0	1978-06-27	2716.06	0	0	0	0	0
1	1978-06-30	210	170	208	65	53	2810.53	0	2	3	8488.68		94.4648	3.478	1978-06-27	2716.06	0	0	0	0	0
1	1978-07-04	230	225	208	65	54	2858.37	0	2	7	8633.06		142.303	5.2393	1978-06-27	2716.06	0	0	0	0	0
1	1978-07-07	245	230	208	66	55	2955.25	1	2	10	8925.46		239.19	8.80648	1978-06-27	2716.06	0	0	0	1	0
1	1978-07-11	190	150	208	66	55	2955.25	100	2	14	8925.46		239.19	8.80648	1978-06-27	2716.06	0	0	0	20	80
1	1978-07-14	250	155	208	66	55	2955.25	100	2	17	8925.46		239.19	8.80648	1978-06-27	2716.06	0	10	0	30	60
1	1978-07-18	255	160	208	66	55	2955.25	100	3	21	8925.46		239.19	8.80648	1978-06-27	2716.06	0	10	0	30	60
1	1978-06-27	190	150	209	50	49	1978.31	0	1	0	5977.05		0	0	1978-06-27	1978.31	0	0	0	0	0
1	1978-06-30	210	170	209	52	50	2100.02	0	2	3	6344.38		121.714	6.15243	1978-06-27	1978.31	0	0	0	0	0
1	1978-07-04	230	225	209	52	50	2100.02	100	2	7	6344.38		121.714	6.15243	1978-06-27	1978.31	0	0	0	0	100
1	1978-07-07	245	230	209	52	50	2100.02	100	2	10	6344.38		121.714	6.15243	1978-06-27	1978.31	0	0	5	0	95
1	1978-07-11	190	150	209	52	50	2100.02	100	3	14	6344.38		121.714	6.15243	1978-06-27	1978.31	0	0	5	0	95
1	1978-06-27	190	150	210	40	43	1390.53	0	1	0	4203.12		0	0	1978-06-27	1390.53	0	0	0	0	0
1	1978-06-30	210	170	210	41	44	1458.35	0	2	3	4407.81		67.8209	4.87734	1978-06-27	1390.53	0	0	0	0	0
1	1978-07-04	230	225	210	43	48	1671.5	0	2	7	5051.1		280.972	20.2061	1978-06-27	1390.53	0	0	0	0	0
1	1978-07-07	245	230	210	44	49	1745.78	0	2	10	5275.27		355.252	25.548	1978-06-27	1390.53	0	0	0	0	0
1	1978-07-11	190	150	210	45	50	1821.68	0	2	14	5504.33		431.147	31.006	1978-06-27	1390.53	0	0	0	0	0
1	1978-07-14	250	155	210	45	50	1821.68	100	2	17	5504.33		431.147	31.006	1978-06-27	1390.53	0	0	0	0	100
1	1978-07-18	255	160	210	45	50	1821.68	100	2	21	5504.33		431.147	31.006	1978-06-27	1390.53	0	0	20	0	80
1	1978-07-24	270	170	210	45	50	1821.68	100	3	27	5504.33		431.147	31.006	1978-06-27	1390.53	0	0	20	0	80
1	1978-06-27	190	150	211	58	50	2354.35	0	1	0	7111.94		0	0	1978-06-27	2354.35	0	0	0	0	0
1	1978-06-30	210	170	211	58	51	2398.15	0	2	3	7244.13		43.801	1.86043	1978-06-27	2354.35	0	0	0	0	0
1	1978-07-04	230	225	211	61	52	2577.39	0	2	7	7785.08		223.042	9.47359	1978-06-27	2354.35	0	0	0	0	0
1	1978-07-07	245	230	211	61	52	2577.39	100	2	10	7785.08		223.042	9.47359	1978-06-27	2354.35	0	0	0	1	99
1	1978-07-11	190	150	211	61	52	2577.39	100	2	14	7785.08		223.042	9.47359	1978-06-27	2354.35	0	0	30	40	30
1	1978-07-14	250	155	211	61	52	2577.39	100	3	17	7785.08		223.042	9.47359	1978-06-27	2354.35	0	0	30	40	30
1	1978-06-27	190	150	212	49	47	1860.23	0	1	0	5620.68		0	0	1978-06-27	1860.23	0	0	0	0	0
1	1978-06-30	210	170	212	49	47	1860.23	0	2	3	5620.68		0	0	1978-06-27	1860.23	0	0	0	0	0
1	1978-07-04	230	225	212	51	49	2018.48	0	2	7	6098.27		158.249	8.50694	1978-06-27	1860.23	0	0	0	0	0
1	1978-07-07	245	230	212	51	49	2018.48	0	2	10	6098.27		158.249	8.50694	1978-06-27	1860.23	0	0	0	0	0
1	1978-07-11	190	150	212	51	50	2059.05	10	2	14	6220.72		198.82	10.6879	1978-06-27	1860.23	0	0	0	10	0
1	1978-07-14	250	155	212	51	50	2059.05	100	2	17	6220.72		198.82	10.6879	1978-06-27	1860.23	0	0	0	30	70
1	1978-07-18	255	160	212	51	50	2059.05	100	3	21	6220.72		198.82	10.6879	1978-06-27	1860.23	0	0	0	30	70
1	1978-06-30	210	170	213	44	39	1390.53	0	1	0	4203.12		0	0	1978-06-30	1390.53	0	0	0	0	0
1	1978-07-04	230	225	213	44	40	1424.24	0	2	4	4304.86		33.7086	2.42415	1978-06-30	1390.53	0	0	0	0	0
1	1978-07-07	245	230	213	45	42	1527.79	0	2	7	4617.36		137.257	9.87081	1978-06-30	1390.53	0	0	0	0	0
1	1978-07-11	190	150	213	45	45	1634.97	5	2	11	4940.84		244.438	17.5787	1978-06-30	1390.53	0	0	0	5	0
1	1978-07-14	250	155	213	45	45	1634.97	30	2	14	4940.84		244.438	17.5787	1978-06-30	1390.53	0	0	0	20	10
1	1978-07-18	255	160	213	45	45	1634.97	100	2	18	4940.84		244.438	17.5787	1978-06-30	1390.53	0	10	20	20	50
1	1978-07-24	270	170	213	45	45	1634.97	100	3	24	4940.84		244.438	17.5787	1978-06-30	1390.53	0	10	20	20	50
1	1978-06-30	210	170	214	54	49	2141.4	0	1	0	6469.26		0	0	1978-06-30	2141.4	0	0	0	0	0
1	1978-07-04	230	225	214	54	50	2183.19	0	2	4	6595.36		41.7825	1.95117	1978-06-30	2141.4	0	0	0	0	0
1	1978-07-07	245	230	214	54	50	2183.19	0	2	7	6595.36		41.7825	1.95117	1978-06-30	2141.4	0	0	0	0	0
1	1978-07-11	190	150	214	54	50	2183.19	5	2	11	6595.36		41.7825	1.95117	1978-06-30	2141.4	0	0	0	5	0
1	1978-07-14	250	155	214	54	50	2183.19	35	2	14	6595.36		41.7825	1.95117	1978-06-30	2141.4	0	0	0	15	20
1	1978-07-18	255	160	214	54	50	2183.19	60	2	18	6595.36		41.7825	1.95117	1978-06-30	2141.4	0	0	0	40	20
1	1978-07-24	270	170	214	54	50	2183.19	60	3	24	6595.36		41.7825	1.95117	1978-06-30	2141.4	0	0	0	40	20
1	1978-06-30	210	170	215	57	49	2267.96	0	1	0	6851.21		0	0	1978-06-30	2267.96	0	0	0	0	0
1	1978-07-04	230	225	215	58	51	2398.15	0	2	4	7244.13		130.192	5.74048	1978-06-30	2267.96	0	0	0	0	0
1	1978-07-07	245	230	215	58	51	2398.15	0	2	7	7244.13		130.192	5.74048	1978-06-30	2267.96	0	0	0	0	0
1	1978-07-11	190	150	215	59	51	2442.36	1	2	11	7377.54		174.396	7.68957	1978-06-30	2267.96	0	0	0	1	0
1	1978-07-14	250	155	215	59	51	2442.36	15	2	14	7377.54		174.396	7.68957	1978-06-30	2267.96	0	0	0	15	0
1	1978-07-18	255	160	215	59	51	2442.36	70	2	18	7377.54		174.396	7.68957	1978-06-30	2267.96	0	0	0	50	20
1	1978-07-24	270	170	215	59	51	2442.36	70	3	24	7377.54		174.396	7.68957	1978-06-30	2267.96	0	0	0	50	20
1	1978-06-30	210	170	216	52	48	2018.48	0	1	0	6098.27		0	0	1978-06-30	2018.48	0	0	0	0	0
1	1978-07-04	230	225	216	53	49	2100.02	0	2	4	6344.38		81.5465	4.04	1978-06-30	2018.48	0	0	0	0	0
1	1978-07-07	245	230	216	53	49	2100.02	0	2	7	6344.38		81.5465	4.04	1978-06-30	2018.48	0	0	0	0	0
1	1978-07-11	190	150	216	53	49	2100.02	1	2	11	6344.38		81.5465	4.04	1978-06-30	2018.48	0	0	0	1	0
1	1978-07-14	250	155	216	54	49	2141.4	15	2	14	6469.26		122.925	6.09	1978-06-30	2018.48	0	0	0	15	0
1	1978-07-18	255	160	216	54	49	2141.4	45	2	18	6469.26		122.925	6.09	1978-06-30	2018.48	0	5	0	40	0
1	1978-07-24	270	170	216	54	49	2141.4	45	3	24	6469.26		122.925	6.09	1978-06-30	2018.48	0	5	0	40	0
1	1978-06-30	210	170	217	53	42	1821.68	0	1	0	5504.33		0	0	1978-06-30	1821.68	0	0	0	0	0
1	1978-07-04	230	225	217	54	42	1860.23	0	2	4	5620.68		38.5529	2.11634	1978-06-30	1821.68	0	0	0	0	0
1	1978-07-07	245	230	217	55	48	2141.4	0	2	7	6469.26		319.727	17.5512	1978-06-30	1821.68	0	0	0	0	0
1	1978-07-11	190	150	217	55	48	2141.4	20	2	11	6469.26		319.727	17.5512	1978-06-30	1821.68	0	0	0	10	10
1	1978-07-14	250	155	217	55	48	2141.4	40	2	14	6469.26		319.727	17.5512	1978-06-30	1821.68	0	0	0	25	15
1	1978-07-18	255	160	217	55	48	2141.4	100	2	18	6469.26		319.727	17.5512	1978-06-30	1821.68	0	10	30	40	20
1	1978-07-24	270	170	217	55	48	2141.4	100	3	24	6469.26		319.727	17.5512	1978-06-30	1821.68	0	10	30	40	20
1	1978-06-30	210	170	218	68	64	3517	0	1	0	10620.8		0	0	1978-06-30	3517	0	0	0	0	0
1	1978-07-04	230	225	218	69	65	3624.38	0	2	4	10944.9		107.383	3.05326	1978-06-30	3517	0	0	0	0	0
1	1978-07-07	245	230	218	69	65	3624.38	0	2	7	10944.9		107.383	3.05326	1978-06-30	3517	0	0	0	0	0
1	1978-07-11	190	150	218	69	65	3624.38	30	2	11	10944.9		107.383	3.05326	1978-06-30	3517	0	0	0	15	15
1	1978-07-14	250	155	218	69	65	3624.38	50	2	14	10944.9		107.383	3.05326	1978-06-30	3517	0	0	0	30	20
1	1978-07-18	255	160	218	69	65	3624.38	100	2	18	10944.9		107.383	3.05326	1978-06-30	3517	0	0	20	40	40
1	1978-07-24	270	170	218	69	65	3624.38	100	3	24	10944.9		107.383	3.05326	1978-06-30	3517	0	0	20	40	40
1	1978-06-30	210	170	219	43	39	1357.22	0	1	0	4102.61		0	0	1978-06-30	1357.22	0	0	0	0	0
1	1978-07-04	230	225	219	43	39	1357.22	0	3	4	4102.61		0	0	1978-06-30	1357.22	0	0	0	0	0
1	1978-06-30	210	170	220	62	56	2810.53	0	1	0	8488.68		0	0	1978-06-30	2810.53	0	0	0	0	0
1	1978-07-04	230	225	220	64	56	2906.61	0	2	4	8778.65		96.0796	3.41856	1978-06-30	2810.53	0	0	0	0	0
1	1978-07-07	245	230	220	65	57	3004.3	0	2	7	9073.49		193.774	6.89457	1978-06-30	2810.53	0	0	0	0	0
1	1978-07-11	190	150	220	65	57	3004.3	100	2	11	9073.49		193.774	6.89457	1978-06-30	2810.53	0	0	0	1	99
1	1978-07-14	250	155	220	65	57	3004.3	100	2	14	9073.49		193.774	6.89457	1978-06-30	2810.53	0	0	0	20	80
1	1978-07-18	255	160	220	65	57	3004.3	100	2	18	9073.49		193.774	6.89457	1978-06-30	2810.53	0	0	0	30	70
1	1978-07-24	270	170	220	65	57	3004.3	100	3	24	9073.49		193.774	6.89457	1978-06-30	2810.53	0	0	0	30	70
1	1978-06-30	210	170	221	56	55	2486.97	0	1	0	7512.17		0	0	1978-06-30	2486.97	0	0	0	0	0
1	1978-07-04	230	225	221	56	55	2486.97	3	2	4	7512.17		0	0	1978-06-30	2486.97	3	0	0	0	0
1	1978-07-07	245	230	221	58	57	2669.44	3	2	7	8062.87		182.47	7.33707	1978-06-30	2486.97	3	0	0	0	0
1	1978-07-11	190	150	221	58	57	2669.44	3	2	11	8062.87		182.47	7.33707	1978-06-30	2486.97	3	0	0	0	0
1	1978-07-14	250	155	221	58	57	2669.44	100	2	14	8062.87		182.47	7.33707	1978-06-30	2486.97	3	0	0	5	92
1	1978-07-18	255	160	221	58	57	2669.44	100	3	18	8062.87		182.47	7.33707	1978-06-30	2486.97	3	0	0	5	92
1	1978-06-30	210	170	222	55	52	2310.96	0	1	0	6980.97		0	0	1978-06-30	2310.96	0	0	0	0	0
1	1978-07-04	230	225	222	57	53	2442.36	0	2	4	7377.54		131.403	5.68609	1978-06-30	2310.96	0	0	0	0	0
1	1978-07-07	245	230	222	57	53	2442.36	0	2	7	7377.54		131.403	5.68609	1978-06-30	2310.96	0	0	0	0	0
1	1978-07-11	190	150	222	59	54	2577.39	0	2	11	7785.08		266.439	11.5294	1978-06-30	2310.96	0	0	0	0	0
1	1978-07-14	250	155	222	59	54	2577.39	10	2	14	7785.08		266.439	11.5294	1978-06-30	2310.96	0	0	0	10	0
1	1978-07-18	255	160	222	59	54	2577.39	50	2	18	7785.08		266.439	11.5294	1978-06-30	2310.96	0	0	0	30	20
1	1978-07-24	270	170	222	59	54	2577.39	50	3	24	7785.08		266.439	11.5294	1978-06-30	2310.96	0	0	0	30	20
1	1978-06-30	210	170	223	48	44	1708.44	0	1	0	5162.58		0	0	1978-06-30	1708.44	0	0	0	0	0
1	1978-07-04	230	225	223	52	47	1978.31	0	2	4	5977.05		269.871	15.7963	1978-06-30	1708.44	0	0	0	0	0
1	1978-07-07	245	230	223	52	48	2018.48	0	2	7	6098.27		310.038	18.1474	1978-06-30	1708.44	0	0	0	0	0
1	1978-07-11	190	150	223	53	48	2059.05	1	2	11	6220.72		350.61	20.5222	1978-06-30	1708.44	0	0	0	1	0
1	1978-07-14	250	155	223	53	48	2059.05	10	2	14	6220.72		350.61	20.5222	1978-06-30	1708.44	0	0	0	10	0
1	1978-07-18	255	160	223	53	48	2059.05	60	2	18	6220.72		350.61	20.5222	1978-06-30	1708.44	0	0	0	20	40
1	1978-07-24	270	170	223	53	48	2059.05	60	3	24	6220.72		350.61	20.5222	1978-06-30	1708.44	0	0	0	20	40
1	1978-07-04	230	225	224	47	46	1745.78	0	1	0	5275.27		0	0	1978-07-04	1745.78	0	0	0	0	0
1	1978-07-07	245	230	224	50	49	1978.31	0	2	3	5977.05		232.529	13.3195	1978-07-04	1745.78	0	0	0	0	0
1	1978-07-11	190	150	224	54	51	2225.37	0	2	7	6722.68		479.59	27.4714	1978-07-04	1745.78	0	0	0	0	0
1	1978-07-14	250	155	224	54	52	2267.96	0	2	10	6851.21		522.18	29.911	1978-07-04	1745.78	0	0	0	0	0
1	1978-07-18	255	160	224	54	52	2267.96	20	2	14	6851.21		522.18	29.911	1978-07-04	1745.78	0	0	0	20	0
1	1978-07-24	270	170	224	54	52	2267.96	40	2	20	6851.21		522.18	29.911	1978-07-04	1745.78	0	0	0	40	0
1	1978-07-27	260	185	224	54	52	2267.96	70	2	23	6851.21		522.18	29.911	1978-07-04	1745.78	0	0	0	70	0
1	1978-08-02	275	170	224	54	52	2267.96	70	3	29	6851.21		522.18	29.911	1978-07-04	1745.78	0	0	0	70	0
1	1978-07-04	230	225	225	51	51	2100.02	0	1	0	6344.38		0	0	1978-07-04	2100.02	0	0	0	0	0
1	1978-07-07	245	230	225	54	54	2354.35	0	2	3	7111.94		254.328	12.1107	1978-07-04	2100.02	0	0	0	0	0
1	1978-07-11	190	150	225	54	55	2398.15	5	2	7	7244.13		298.129	14.1965	1978-07-04	2100.02	0	0	0	5	0
1	1978-07-14	250	155	225	54	55	2398.15	35	2	10	7244.13		298.129	14.1965	1978-07-04	2100.02	0	0	0	25	10
1	1978-07-18	255	160	225	54	55	2398.15	100	2	14	7244.13		298.129	14.1965	1978-07-04	2100.02	0	10	0	30	60
1	1978-07-24	270	170	225	54	55	2398.15	100	3	20	7244.13		298.129	14.1965	1978-07-04	2100.02	0	10	0	30	60
1	1978-07-04	230	225	226	63	54	2763.09	0	1	0	8345.53		0	0	1978-07-04	2763.09	0	0	0	0	0
1	1978-07-07	245	230	226	65	55	2906.61	0	2	3	8778.65		143.514	5.19395	1978-07-04	2763.09	0	0	0	0	0
1	1978-07-11	190	150	226	67	56	3053.76	0	2	7	9222.74		290.661	10.5194	1978-07-04	2763.09	0	0	0	0	0
1	1978-07-14	250	155	226	67	56	3053.76	10	2	10	9222.74		290.661	10.5194	1978-07-04	2763.09	0	0	0	10	0
1	1978-07-18	255	160	226	67	56	3053.76	30	2	14	9222.74		290.661	10.5194	1978-07-04	2763.09	0	0	0	30	0
1	1978-07-24	270	170	226	67	56	3053.76	30	3	20	9222.74		290.661	10.5194	1978-07-04	2763.09	0	0	0	30	0
1	1978-07-04	230	225	227	42	41	1390.53	0	1	0	4203.12		0	0	1978-07-04	1390.53	0	0	0	0	0
1	1978-07-07	245	230	227	44	43	1527.79	0	2	3	4617.36		137.257	9.87081	1978-07-04	1390.53	0	0	0	0	0
1	1978-07-11	190	150	227	49	48	1899.19	0	2	7	5738.25		508.656	36.5801	1978-07-04	1390.53	0	0	0	0	0
1	1978-07-14	250	155	227	50	48	1938.55	10	2	10	5857.04		548.017	39.4107	1978-07-04	1390.53	0	0	0	10	0
1	1978-07-18	255	160	227	50	48	1938.55	100	2	14	5857.04		548.017	39.4107	1978-07-04	1390.53	0	0	0	30	70
1	1978-07-24	270	170	227	50	48	1938.55	100	3	20	5857.04		548.017	39.4107	1978-07-04	1390.53	0	0	0	30	70
1	1978-07-04	230	225	228	65	59	3103.61	0	1	0	9373.21		0	0	1978-07-04	3103.61	0	0	0	0	0
1	1978-07-07	245	230	228	66	60	3204.54	20	2	3	9677.79		100.924	3.25182	1978-07-04	3103.61	0	0	0	20	0
1	1978-07-11	190	150	228	68	62	3411.23	100	2	7	10301.6		307.616	9.91155	1978-07-04	3103.61	0	0	0	25	75
1	1978-07-14	250	155	228	68	62	3411.23	100	2	10	10301.6		307.616	9.91155	1978-07-04	3103.61	0	20	0	40	40
1	1978-07-18	255	160	228	68	62	3411.23	100	2	14	10301.6		307.616	9.91155	1978-07-04	3103.61	0	10	25	45	20
1	1978-07-24	270	170	228	68	62	3411.23	100	3	20	10301.6		307.616	9.91155	1978-07-04	3103.61	0	10	25	45	20
1	1978-07-04	230	225	229	40	38	1228.04	0	1	0	3712.74		0	0	1978-07-04	1228.04	0	0	0	0	0
1	1978-07-07	245	230	229	41	39	1291.83	0	2	3	3905.24		63.7839	5.19395	1978-07-04	1228.04	0	0	0	0	0
1	1978-07-11	190	150	229	41	39	1291.83	0	2	7	3905.24		63.7839	5.19395	1978-07-04	1228.04	0	0	0	0	0
1	1978-07-14	250	155	229	41	39	1291.83	0	2	10	3905.24		63.7839	5.19395	1978-07-04	1228.04	0	0	0	0	0
1	1978-07-18	255	160	229	41	39	1291.83	1	2	14	3905.24		63.7839	5.19395	1978-07-04	1228.04	0	0	0	1	0
1	1978-07-24	270	170	229	41	39	1291.83	10	2	20	3905.24		63.7839	5.19395	1978-07-04	1228.04	0	0	0	10	0
1	1978-07-27	260	185	229	41	39	1291.83	25	2	23	3905.24		63.7839	5.19395	1978-07-04	1228.04	0	0	0	20	5
1	1978-08-02	275	170	229	41	39	1291.83	100	2	29	3905.24		63.7839	5.19395	1978-07-04	1228.04	0	60	0	20	20
1	1978-08-07	245	180	229	41	39	1291.83	100	3	34	3905.24		63.7839	5.19395	1978-07-04	1228.04	0	60	0	20	20
1	1978-07-04	230	225	230	64	56	2906.61	0	1	0	8778.65		0	0	1978-07-04	2906.61	0	0	0	0	0
1	1978-07-07	245	230	230	64	56	2906.61	0	2	3	8778.65		0	0	1978-07-04	2906.61	0	0	0	0	0
1	1978-07-11	190	150	230	66	57	3053.76	0	2	7	9222.74		147.147	5.0625	1978-07-04	2906.61	0	0	0	0	0
1	1978-07-14	250	155	230	66	58	3103.61	5	2	10	9373.21		197.003	6.77778	1978-07-04	2906.61	0	0	0	5	0
1	1978-07-18	255	160	230	67	58	3153.87	25	2	14	9524.89		247.264	8.50694	1978-07-04	2906.61	0	0	0	20	5
1	1978-07-24	270	170	230	67	58	3153.87	25	3	20	9524.89		247.264	8.50694	1978-07-04	2906.61	0	0	0	20	5
1	1978-07-04	230	225	231	44	40	1424.24	0	1	0	4304.86		0	0	1978-07-04	1424.24	0	0	0	0	0
1	1978-07-07	245	230	231	44	40	1424.24	0	2	3	4304.86		0	0	1978-07-04	1424.24	0	0	0	0	0
1	1978-07-11	190	150	231	48	42	1634.97	1	2	7	4940.84		210.729	14.7959	1978-07-04	1424.24	0	0	0	1	0
1	1978-07-14	250	155	231	48	42	1634.97	15	2	10	4940.84		210.729	14.7959	1978-07-04	1424.24	0	0	0	15	0
1	1978-07-18	255	160	231	48	43	1671.5	50	2	14	5051.1		247.264	17.3611	1978-07-04	1424.24	0	0	0	40	10
1	1978-07-24	270	170	231	48	43	1671.5	50	3	20	5051.1		247.264	17.3611	1978-07-04	1424.24	0	0	0	40	10
1	1978-07-04	230	225	232	32	30	775.903	0	1	0	2348.18		0	0	1978-07-04	775.903	0	0	0	0	0
1	1978-07-07	245	230	232	32	30	775.903	0	2	3	2348.18		0	0	1978-07-04	775.903	0	0	0	0	0
1	1978-07-11	190	150	232	35	31	879.249	0	2	7	2660.08		103.346	13.3195	1978-07-04	775.903	0	0	0	0	0
[truncated: 2,604 more rows]

## Sheet: Description
CT1 1978
A	leaf type: 1=normal, 2=from flower stem
B	date
C	maximum temperature
D	minimum temperature
E	leaf number
F	length
G	width
H	surface; H = 1.028*3.1416*((F+G)/4)*((F+G)/4)
I	% total damage; I = R+S+T+U+V
J	status: 1=first observation and first occurrence, 2=next observation, 3=last observation; J = IF(E(x)=E(x+1),(IF(AND(E(x)<>E(x-1),B(x)<>28636.5), 1,2)),3)
K	age; K = B-P
L	potential biomass / month; L = (3.018+H)+6.506
M	potential biomass - overall; TODO???
N	absolute growth since day of first occurrence; N = H-Q
O	relative growth since day of first occurrence; O = (H-Q)/Q*100
P	date of first occurrence / creation date; P = IF(E(x)=E(x-1),P(x-1),B(x))
Q	begin surface; Q = IF(E(x)=E(x-1),Q(x-1),H(x))
R	% damage Cataclysta
S	% damage snails
T	% danage microbial decay
U	% damage Septoria villarsiae Desm.
V	% damage autolysis
W
X
Y
Z
Leaf type	Date	Max temp	Min temp	Leaf #	Length	Width	Surface	Tot % dam	Status	Age	Pot Biom/m	Pot Biom/a	Abs grow	Rel grow	Crea date	Begin surf	Cataclysta %	Rem dam %	Micr dec %	Septoria %	Autolysis %
